# Supplementary material for: Diabetes risk loci-associated pathways are shared across metabolic tissues
Source: BMC Genomics. 2022 May 14;23:368. doi: 10.1186/s12864-022-08587-5 (PMC9107144; doi:10.1186/s12864-022-08587-5)
Supplement: Supplementary file 3 — Additional file 3: Table S2. eQTLs associated with T2D SNPs. [file 12864_2022_8587_MOESM3_ESM.xlsx]

## Sheet: Sheet 1
Table S2 eQTLs associated with T2D SNPs
SNP	tissue	gencodeId	gene	tStatistic	nes	error	pValue	pValueThreshold	H4.PP
rs1061810	Thyroid	ENSG00000149084.12	HSD17B12	-35.2841707024148	-0.782741	0.0221839	2.85197e-138	0.000196901	1.17725e-12
rs4281707	Thyroid	ENSG00000103479.15	RBL2	-35.2478099001259	0.688726	0.0195395	4.12926e-138	0.000164353	3.48717e-150
rs1061810	Whole_Blood	ENSG00000149084.12	HSD17B12	-32.9197322708299	-0.672251	0.0204209	1.4902e-136	0.000159937	0.935542
rs4932265	Thyroid	ENSG00000157823.16	AP3S2	-33.4222395532121	0.733005	0.0219317	5.95728e-130	0.000167492	1.30401e-38
rs1061810	Adipose_Subcutaneous	ENSG00000149084.12	HSD17B12	-32.1631745008361	-0.800096	0.0248762	6.77405e-125	0.000172929	2.55853e-09
rs1061810	Adipose_Subcutaneous	ENSG00000283375.1	RP11-613D13.10	-31.1494036616589	-0.849716	0.0272787	3.48568e-120	0.000162572	1.41429e-06
rs1061810	Thyroid	ENSG00000283375.1	RP11-613D13.10	-30.81741902799	-0.824489	0.026754	5.13267e-118	0.000187916	0.999964
rs4932265	Adipose_Subcutaneous	ENSG00000157823.16	AP3S2	-29.686317838463	0.686105	0.0231118	2.66645e-113	0.000146911	1.72822e-18
rs13737	Whole_Blood	ENSG00000140400.16	MAN2C1	27.6728441097512	-0.563417	0.0203599	2.93973e-109	0.000313775	3.87358e-233
rs1061810	Adipose_Visceral_Omentum	ENSG00000149084.12	HSD17B12	-30.2534136135075	-0.774018	0.0255845	2.48804e-105	9.59386e-05	5.54796e-07
rs13737	Thyroid	ENSG00000140400.16	MAN2C1	27.1782924603283	-0.678036	0.0249477	7.91822e-101	0.000423111	5.04004e-303
rs4932265	Adipose_Visceral_Omentum	ENSG00000157823.16	AP3S2	-28.0100532332716	0.687678	0.0245511	3.03613e-96	9.84191e-05	2.57218e-46
rs1061810	Adipose_Visceral_Omentum	ENSG00000283375.1	RP11-613D13.10	-27.7182455065278	-0.862298	0.0311094	4.81448e-95	0.000102916	0.000426555
rs13737	Adipose_Subcutaneous	ENSG00000140400.16	MAN2C1	25.319500009882	-0.767399	0.0303086	2.93182e-92	0.000359851	1.36393e-285
rs1061810	Muscle_Skeletal	ENSG00000149084.12	HSD17B12	-22.71884930449	-0.553488	0.0243625	4.10707e-84	0.000165765	0.993308
rs1061810	Colon_Transverse	ENSG00000149084.12	HSD17B12	-26.0651316485322	-0.681536	0.0261474	7.60054e-79	7.22839e-05	1.9535e-14
rs601945	Muscle_Skeletal	ENSG00000237541.3	HLA-DQA2	21.6560827300383	1.18676	0.0548005	2.49539e-78	0.000280692	7.42314e-18
rs13737	Adipose_Visceral_Omentum	ENSG00000140400.16	MAN2C1	23.3480253418615	-0.902858	0.0386696	1.24417e-76	0.000208826	1.55322e-247
rs8046545	Whole_Blood	ENSG00000178952.10	TUFM	-21.0891497101141	0.481135	0.0228144	2.74502e-74	0.000194613	1.17685e-78
rs1061810	Colon_Transverse	ENSG00000283375.1	RP11-613D13.10	-24.1669525190236	-0.633237	0.0262026	3.4167e-72	8.50142e-05	6.86729e-07
rs2581787	Thyroid	ENSG00000163933.9	RFT1	-20.6205049089749	-0.549223	0.0266348	5.8562e-69	0.000328174	0.0683299
rs601945	Whole_Blood	ENSG00000237541.3	HLA-DQA2	19.989205271775	1.07945	0.0540015	1.6306e-68	0.000173958	1.25401e-14
rs8046545	Whole_Blood	ENSG00000197165.10	SULT1A2	-19.8822958885972	0.799306	0.0402019	5.89571e-68	0.000193108	2.94143e-53
rs1061810	Stomach	ENSG00000149084.12	HSD17B12	-23.6416148982304	-0.618528	0.0261627	1.26776e-67	5.29615e-05	7.97052e-09
rs62007683	Thyroid	ENSG00000075413.17	MARK3	20.2149081633908	-0.556763	0.0275422	5.50371e-67	0.000205455	1.77789e-34
rs4281707	Adipose_Subcutaneous	ENSG00000103479.15	RBL2	-19.9388155934443	0.360648	0.0180877	7.38836e-66	0.000144015	1.26806e-20
rs2581787	Colon_Sigmoid	ENSG00000163933.9	RFT1	-23.0032990876806	-0.925587	0.0402372	6.4451e-65	0.000151586	0.0276609
rs4281707	Colon_Transverse	ENSG00000103479.15	RBL2	-21.5818957614808	0.519471	0.0240697	7.36275e-63	6.92989e-05	6.08421e-31
rs601945	Adipose_Subcutaneous	ENSG00000237541.3	HLA-DQA2	19.1061186791437	1.24989	0.0654181	8.3681e-62	0.000263398	4.48684e-12
rs576123	Muscle_Skeletal	ENSG00000175164.13	ABO	-18.5512484624831	0.714814	0.0385319	9.87563e-62	0.000102415
rs11642430	Adipose_Subcutaneous	ENSG00000090238.11	YPEL3	18.6634717320257	0.365681	0.0195934	1.1659e-59	0.000323285	3.27078e-06
rs4281707	Pancreas	ENSG00000103479.15	RBL2	-20.9565242339867	0.627552	0.0299454	5.63179e-57	5.47323e-05	2.54543e-35
rs4932265	Stomach	ENSG00000157823.16	AP3S2	-20.518912831921	0.941289	0.0458742	5.85082e-57	5.68414e-05	1.34326e-17
rs1061810	Colon_Sigmoid	ENSG00000149084.12	HSD17B12	-20.6287693894055	-0.699587	0.0339132	6.77675e-57	7.91474e-05	3.33925e-06
rs601945	Thyroid	ENSG00000237541.3	HLA-DQA2	18.1125343827304	1.13654	0.062749	7.66146e-57	0.000268064	8.28272e-17
rs3772071	Adipose_Subcutaneous	ENSG00000115221.10	ITGB6	-18.0398995167512	-0.782204	0.0433596	1.17733e-56	0.000347744	2.3177e-22
rs7124681	Adipose_Subcutaneous	ENSG00000172247.3	C1QTNF4	-18.019938303303	-0.533365	0.0295986	1.46798e-56	0.000761798	1.13792e-10
rs4688760	Whole_Blood	ENSG00000004534.14	RBM6	-17.4489321327817	-0.458494	0.0262763	1.88587e-55	0.000742038	0.994291
rs13737	Colon_Transverse	ENSG00000140400.16	MAN2C1	19.3937007513422	-0.768553	0.039629	9.26473e-55	0.000162854	1.38964e-152
rs4932265	Pancreas	ENSG00000157823.16	AP3S2	-19.6785985199801	0.701998	0.0356732	1.0318e-52	6.08608e-05	1.65884e-14
rs1061810	Stomach	ENSG00000283375.1	RP11-613D13.10	-19.2713609511272	-0.620206	0.0321828	1.37762e-52	5.07058e-05	3.79507e-06
rs601945	Adipose_Visceral_Omentum	ENSG00000237541.3	HLA-DQA2	17.3612128072474	1.2823	0.07386	1.06892e-50	0.000163516	2.66477e-09
rs1061810	Muscle_Skeletal	ENSG00000283375.1	RP11-613D13.10	-15.9961757160507	-0.514197	0.032145	1.17974e-48	0.000164807	0.428707
rs576123	Adipose_Visceral_Omentum	ENSG00000175164.13	ABO	-16.7416009346759	0.639099	0.0381743	4.92129e-48	6.44194e-05
rs1580278	Thyroid	ENSG00000164039.14	BDH2	16.1540021927252	-0.494245	0.0305958	1.31557e-47	0.000272617	0.000335667
rs1061810	Pancreas	ENSG00000149084.12	HSD17B12	-18.1427901170585	-0.630466	0.0347502	1.6464e-47	7.68381e-05	7.85505e-05
rs13737	Colon_Sigmoid	ENSG00000140400.16	MAN2C1	17.5982997992699	-0.72507	0.0412011	2.40106e-46	0.000160733	1.17581e-119
rs1061810	Colon_Sigmoid	ENSG00000283375.1	RP11-613D13.10	-17.5305960550164	-0.706328	0.0402911	4.15744e-46	7.49919e-05	1.62869e-07
rs3115960	Thyroid	ENSG00000261783.1	RP11-252K23.2	-15.7937884216317	0.696179	0.0440793	6.08858e-46	0.000196468	6.39928e-28
rs4932265	Colon_Sigmoid	ENSG00000157823.16	AP3S2	-17.4127311372442	0.789989	0.0453685	1.08163e-45	7.99617e-05	2.27288e-18
rs4281707	Colon_Sigmoid	ENSG00000103479.15	RBL2	-17.3777671859718	0.466713	0.0268569	1.43649e-45	6.60362e-05	1.80003e-11
rs13737	Stomach	ENSG00000140400.16	MAN2C1	17.2822035673687	-0.762758	0.0441355	1.58485e-45	0.000113297	4.3866e-93
rs2028150	Thyroid	ENSG00000234255.8	AC012370.3	-15.5912660981604	0.698111	0.0447758	5.19308e-45	0.000161038	0.00016808
rs4932265	Whole_Blood	ENSG00000157823.16	AP3S2	-15.2269913684961	0.307864	0.0202183	1.6533e-44	0.000132304	0.000532558
rs4281707	Stomach	ENSG00000103479.15	RBL2	-16.8213441874992	0.507287	0.0301574	7.00814e-44	4.41979e-05	2.70006e-15
rs4932265	Pituitary	ENSG00000157823.16	AP3S2	-18.0992750032775	1.11512	0.0616115	9.08366e-44	5.07254e-05	6.60269e-22
rs2581787	Adipose_Subcutaneous	ENSG00000163933.9	RFT1	-15.2445125943228	-0.46011	0.030182	1.59614e-43	0.000327267	9.31153e-07
rs1061810	Whole_Blood	ENSG00000283375.1	RP11-613D13.10	-14.9564839839673	-0.502905	0.0336246	3.22884e-43	0.00012639	0.134313
rs4281707	Adipose_Visceral_Omentum	ENSG00000103479.15	RBL2	-15.5788576872224	0.372441	0.0239069	4.3832e-43	7.63725e-05	9.89445e-26
rs1580278	Muscle_Skeletal	ENSG00000164039.14	BDH2	14.7632244990924	-0.476795	0.0322961	1.25316e-42	0.000299614	1.05266e-06
rs96844	Muscle_Skeletal	ENSG00000155542.11	SETD9	14.7598820155627	-0.552931	0.0374617	1.30028e-42	0.000161187	5.61965e-24
rs2581787	Adipose_Visceral_Omentum	ENSG00000163933.9	RFT1	-15.3878896670739	-0.461291	0.0299776	2.8006e-42	0.000179782	1.38059e-07
rs2581787	Colon_Transverse	ENSG00000163933.9	RFT1	-15.8334072829261	-0.565538	0.035718	2.14066e-41	0.000169057	2.40103e-10
rs2249105	Colon_Sigmoid	ENSG00000011523.13	CEP68	-16.1864131161403	0.423906	0.026189	2.31251e-41	6.59921e-05	0.215091
rs2581787	Muscle_Skeletal	ENSG00000163933.9	RFT1	-14.4748731471868	-0.392727	0.0271317	2.9826e-41	0.000273773	0.00203879
rs1580278	Adipose_Subcutaneous	ENSG00000164039.14	BDH2	14.7021222438448	-0.362702	0.02467	4.62605e-41	0.000276712	3.34113e-08
rs1061810	Pancreas	ENSG00000283375.1	RP11-613D13.10	-16.1913702895309	-0.78323	0.0483733	8.18598e-41	6.14006e-05	0.0790913
rs4688760	Thyroid	ENSG00000004534.14	RBM6	-14.4338032927954	-0.383757	0.0265874	8.94383e-40	0.00103493	0.999764
rs7124681	Muscle_Skeletal	ENSG00000172247.3	C1QTNF4	-14.1250179651654	-0.507505	0.0359295	1.33847e-39	0.000733789	0.387294
rs96844	Whole_Blood	ENSG00000155542.11	SETD9	14.1820557212781	-0.610255	0.0430301	1.39647e-39	0.00011875	9.95232e-11
rs13737	Pancreas	ENSG00000140400.16	MAN2C1	15.6810867363925	-0.660906	0.0421467	4.69616e-39	0.000161635	1.92725e-114
rs3751837	Thyroid	ENSG00000103351.12	CLUAP1	14.0358324473012	0.511516	0.0364436	5.18562e-38	0.000176091	0.00191138
rs11642430	Thyroid	ENSG00000169592.14	INO80E	-13.9381448490451	-0.399994	0.0286978	1.39452e-37	0.000409181	0.0602818
rs649961	Liver	ENSG00000221955.10	SLC12A8	16.4555881487864	-0.842655	0.0512078	7.3892e-37	4.57746e-05	0.403735
rs8046545	Muscle_Skeletal	ENSG00000197165.10	SULT1A2	-13.4850669855807	0.620178	0.04599	1.24112e-36	0.000235224	1.96114e-13
rs340874	Thyroid	ENSG00000274895.1	RP11-478J18.2	13.7043299578115	0.503232	0.0367207	1.47027e-36	0.000178914	0.198123
rs2249105	Adipose_Subcutaneous	ENSG00000011523.13	CEP68	-13.632949786967	0.298773	0.0219155	2.57326e-36	0.00015356	1.085e-10
rs4281707	Pituitary	ENSG00000103479.15	RBL2	-15.6101741958878	0.564939	0.0361905	2.7547e-36	4.86035e-05	1.26163e-29
rs3115960	Adipose_Subcutaneous	ENSG00000261783.1	RP11-252K23.2	-13.6118043439038	0.630994	0.0463564	3.18232e-36	0.000178993	1.27622e-12
rs13737	Adipose_Subcutaneous	ENSG00000260274.1	RP11-817O13.8	13.5835483928313	-0.417615	0.0307442	4.22595e-36	0.000377062	1.55949e-20
rs113414093	Muscle_Skeletal	ENSG00000115596.3	WNT6	13.3508401253175	1.15345	0.0863953	5.09057e-36	0.000191929
rs11642430	Thyroid	ENSG00000090238.11	YPEL3	13.5083329733565	0.235595	0.0174407	1.04457e-35	0.000401625	0.0016227
rs17122772	Thyroid	ENSG00000155465.18	SLC7A7	-13.5074053015233	-0.441961	0.0327199	1.05427e-35	0.000126882	0.214166
rs601945	Colon_Sigmoid	ENSG00000237541.3	HLA-DQA2	14.5058113534438	1.18414	0.0816318	1.97256e-35	0.000112269	7.75206e-06
rs1061810	Pituitary	ENSG00000149084.12	HSD17B12	-15.1995402997834	-0.577126	0.03797	4.91281e-35	5.33486e-05	0.344636
rs601945	Colon_Transverse	ENSG00000237541.3	HLA-DQA2	14.0164429101646	1.02651	0.0732359	1.24543e-34	0.000135215	2.47274e-07
rs96844	Thyroid	ENSG00000155542.11	SETD9	13.1074711968213	-0.611572	0.0466583	5.53084e-34	0.000198328	1.11607e-14
rs4688760	Adipose_Subcutaneous	ENSG00000004534.14	RBM6	-13.0699769343235	-0.38909	0.0297698	6.97919e-34	0.00087082	0.99437
rs601945	Stomach	ENSG00000237541.3	HLA-DQA2	13.9343315643937	1.03315	0.0741446	1.35956e-33	8.14619e-05	7.8393e-07
rs2872246	Whole_Blood	ENSG00000114770.16	ABCC5	-12.8495166572121	0.331937	0.0258327	1.48345e-33	0.000136148	0.0930253
rs2581787	Pituitary	ENSG00000163933.9	RFT1	-14.7005994762958	-0.594323	0.0404285	1.64279e-33	0.000105773	0.00141829
rs3115960	Adipose_Visceral_Omentum	ENSG00000261783.1	RP11-252K23.2	-13.2115514606774	0.714549	0.0540852	2.61176e-33	0.000114038	1.59661e-27
rs62007683	Muscle_Skeletal	ENSG00000256053.7	APOPT1	-12.7281061661556	0.275659	0.0216575	3.20095e-33	0.000165057	0.00128103
rs1260326	Muscle_Skeletal	ENSG00000115234.10	SNX17	-12.5910952228156	-0.318472	0.0252934	1.29016e-32	0.000335109	0.483319
rs12640250	Adipose_Subcutaneous	ENSG00000163257.10	DCAF16	-12.7217623632711	-0.348294	0.0273778	2.10782e-32	0.000192604	0.418069
rs113414093	Adipose_Subcutaneous	ENSG00000115596.3	WNT6	12.5272782825649	0.896434	0.0715586	1.38563e-31	0.000176473
rs12719778	Whole_Blood	ENSG00000160972.9	PPP1R16A	-12.302846354829	0.289699	0.0235473	3.53783e-31	0.000164716	4.33769e-07
rs2249105	Adipose_Visceral_Omentum	ENSG00000011523.13	CEP68	-12.5425878645515	0.300841	0.0239856	1.18881e-30	8.54622e-05	5.30433e-05
rs8046545	Whole_Blood	ENSG00000169682.17	SPNS1	-12.166075873363	0.228674	0.0187961	1.36198e-30	0.000212077	5.03663e-12
rs13737	Pituitary	ENSG00000140400.16	MAN2C1	13.6496391082606	-0.687582	0.0503736	2.71313e-30	0.000142223	3.5478e-59
rs96844	Colon_Transverse	ENSG00000155542.11	SETD9	12.7792966392735	-0.50685	0.0396618	4.07926e-30	7.07772e-05	2.73223e-19
rs1061810	Pituitary	ENSG00000283375.1	RP11-613D13.10	-13.5385187743382	-0.645198	0.0476565	5.93971e-30	5.98746e-05	0.0311008
rs8046545	Adipose_Subcutaneous	ENSG00000251417.2	RP11-1348G14.4	12.0960282645573	-0.593667	0.0490795	8.53961e-30	0.000236099	1.36094e-06
rs3772071	Adipose_Visceral_Omentum	ENSG00000115221.10	ITGB6	-12.3091104193743	-0.71944	0.0584478	9.75673e-30	0.000211786	6.82784e-12
rs2767036	Thyroid	ENSG00000149089.12	APIP	12.0843325422554	-0.634167	0.0524784	1.05909e-29	0.000183045	0.0026325
rs11642430	Adipose_Subcutaneous	ENSG00000169592.14	INO80E	-11.9872086244032	-0.353441	0.0294848	2.38637e-29	0.000349298	0.0214714
rs3751837	Muscle_Skeletal	ENSG00000103351.12	CLUAP1	11.7950011494229	0.432894	0.0367015	3.54522e-29	0.000112835	3.74467e-05
rs4932265	Liver	ENSG00000157823.16	AP3S2	-13.681530200402	0.784643	0.0573505	4.1052e-29	3.34679e-05	0.000197157
rs4281707	Small_Intestine_Terminal_Ileum	ENSG00000103479.15	RBL2	-14.4346505934633	0.74017	0.0512773	4.45774e-29	3.14503e-05	1.84696e-15
rs4148856	Adipose_Subcutaneous	ENSG00000111328.6	CDK2AP1	11.8052900647542	0.371275	0.0314499	1.31485e-28	0.000309105	3.33147e-22
rs3751837	Adipose_Subcutaneous	ENSG00000103351.12	CLUAP1	11.7912452485426	0.524857	0.0445124	1.49911e-28	0.00013012	1.94079e-07
rs4932265	Small_Intestine_Terminal_Ileum	ENSG00000157823.16	AP3S2	-14.1812265707738	0.581891	0.0410325	1.88392e-28	3.69162e-05	0.000429872
rs13737	Small_Intestine_Terminal_Ileum	ENSG00000140400.16	MAN2C1	14.1559124664681	-0.836629	0.0591011	2.17631e-28	8.92853e-05	7.31194e-40
rs3111316	Muscle_Skeletal	ENSG00000179115.10	FARSA	-11.5337906126916	-0.153158	0.0132791	4.44164e-28	0.000164454	0.00787811
rs2249105	Muscle_Skeletal	ENSG00000011523.13	CEP68	-11.4597746028783	0.253251	0.0220991	9.03213e-28	0.000136331	1.46385e-10
rs11642430	Adipose_Visceral_Omentum	ENSG00000169592.14	INO80E	-11.7693109886131	-0.341897	0.0290499	1.1843e-27	0.00019787	0.000551051
rs601945	Pancreas	ENSG00000237541.3	HLA-DQA2	12.1607934995562	1.02599	0.084369	4.86861e-27	9.1217e-05	5.21962e-09
rs4932265	Colon_Transverse	ENSG00000157823.16	AP3S2	-11.8428451815395	0.347859	0.029373	8.91388e-27	8.26172e-05	0.0248775
rs6884702	Thyroid	ENSG00000272335.1	RP11-53O19.3	-11.2944236635889	-0.287248	0.0254327	1.59164e-26	0.000549087	1.05058e-09
rs96844	Colon_Sigmoid	ENSG00000155542.11	SETD9	11.9297711412222	-0.702929	0.0589223	1.63929e-26	7.03009e-05	6.26813e-14
rs7978610	Adipose_Visceral_Omentum	ENSG00000119242.8	CCDC92	11.4574260414293	-0.335909	0.029318	1.80974e-26	9.71667e-05	0.00226127
rs1061810	Small_Intestine_Terminal_Ileum	ENSG00000149084.12	HSD17B12	-13.3808559898954	-0.518747	0.0387678	1.84796e-26	4.75152e-05	0.0229503
rs96844	Stomach	ENSG00000155542.11	SETD9	11.8339965312072	-0.727473	0.0614731	2.72318e-26	5.40927e-05	0.000110965
rs11257655	Whole_Blood	ENSG00000183049.12	CAMK1D	11.116705449706	0.285107	0.0256467	3.10613e-26	7.26131e-05	1
rs601945	Liver	ENSG00000237541.3	HLA-DQA2	12.6339720954775	1.21798	0.096405	3.77838e-26	5.23473e-05	2.30265e-05
rs113414093	Thyroid	ENSG00000115596.3	WNT6	11.1709317631207	1.03867	0.0929795	4.86855e-26	0.000199616
rs1061810	Small_Intestine_Terminal_Ileum	ENSG00000283375.1	RP11-613D13.10	-13.1554309961245	-0.587588	0.044665	6.77961e-26	3.74026e-05	0.000794871
rs8046545	Adipose_Visceral_Omentum	ENSG00000197165.10	SULT1A2	-11.2386753583993	0.487986	0.0434203	1.19906e-25	0.00015631	9.9049e-10
rs2581787	Small_Intestine_Terminal_Ileum	ENSG00000163933.9	RFT1	-13.0516434561145	-0.632117	0.048432	1.23472e-25	7.22077e-05	0.00058052
rs11496066	Stomach	ENSG00000128606.12	LRRC17	11.6277014918972	-0.459151	0.0394877	1.36557e-25	7.2248e-05	0.3256
rs2052261	Colon_Sigmoid	ENSG00000011523.13	CEP68	11.6118645985027	0.359759	0.030982	1.93437e-25	6.59921e-05	3.16216e-22
rs1580278	Adipose_Visceral_Omentum	ENSG00000164039.14	BDH2	11.1825060448375	-0.293103	0.0262109	1.94281e-25	0.00016271	0.635385
rs4688760	Muscle_Skeletal	ENSG00000004534.14	RBM6	-10.8745324978763	-0.302284	0.0277974	2.22482e-25	0.000890503	0.999923
rs2249105	Whole_Blood	ENSG00000011523.13	CEP68	-10.8951110229453	0.318145	0.0292007	2.40221e-25	0.0001283	0.333319
rs11070332	Colon_Transverse	ENSG00000103932.11	RPAP1	-11.4217078451741	-0.349189	0.0305724	2.65294e-25	0.000151542	0.999059
rs113414093	Adipose_Visceral_Omentum	ENSG00000115596.3	WNT6	11.1267459904362	0.825681	0.0742069	3.13302e-25	0.000114205
rs3111316	Pituitary	ENSG00000105607.12	GCDH	-11.9835805636228	-0.555035	0.0463163	3.28699e-25	5.83388e-05	0.534773
rs12920022	Muscle_Skeletal	ENSG00000167526.13	RPL13	-10.8297254633419	-0.262652	0.0242529	3.36481e-25	0.000199634
rs4925109	Muscle_Skeletal	ENSG00000197815.4	RP1-253P7.4	10.8120091228661	-0.356651	0.0329866	3.96152e-25	0.000267324	0.963006
rs8046545	Thyroid	ENSG00000178952.10	TUFM	-10.9188181305253	0.227097	0.0207987	4.66511e-25	0.000281668	3.55856e-18
rs8046545	Thyroid	ENSG00000196502.11	SULT1A1	10.916205700394	-0.482957	0.0442422	4.77488e-25	0.000242577	6.7732e-05
rs3751837	Pituitary	ENSG00000103351.12	CLUAP1	11.8797587275761	0.687079	0.0578361	6.78017e-25	4.51264e-05	1
rs2727301	Adipose_Subcutaneous	ENSG00000108592.16	FTSJ3	10.8590113612934	-0.469156	0.0432043	7.38199e-25	0.000301088	0.000309478
rs4148856	Thyroid	ENSG00000090975.12	PITPNM2	-10.8374604130161	-0.406785	0.0375351	9.60981e-25	0.000454392	2.58951e-10
rs3751837	Adipose_Visceral_Omentum	ENSG00000103351.12	CLUAP1	10.9105891804251	0.440589	0.0403818	1.9743e-24	7.1607e-05	0.00914799
rs2052261	Adipose_Subcutaneous	ENSG00000011523.13	CEP68	10.7415339801086	0.265042	0.0246745	2.092e-24	0.00015356	4.22684e-18
rs13737	Thyroid	ENSG00000260274.1	RP11-817O13.8	10.7398673999201	-0.386748	0.0360105	2.27677e-24	0.000412174	3.06633e-13
rs601945	Pituitary	ENSG00000237541.3	HLA-DQA2	11.6961302264419	1.05098	0.0898573	2.4342e-24	8.34663e-05	0.246266
rs10937721	Thyroid	ENSG00000109501.13	WFS1	10.6905286601949	0.270637	0.0253156	3.51491e-24	9.959e-05	2.05397e-09
rs96844	Adipose_Visceral_Omentum	ENSG00000155542.11	SETD9	10.8045234482386	-0.388056	0.0359161	4.83828e-24	9.60192e-05	2.78843e-09
rs576123	Pituitary	ENSG00000175164.13	ABO	-11.5902311726938	0.501376	0.0432585	5.07977e-24	3.89218e-05
rs3115960	Colon_Transverse	ENSG00000261783.1	RP11-252K23.2	-10.9930075840836	0.671591	0.0610926	7.99774e-24	8.54986e-05	4.50613e-11
rs2052261	Adipose_Visceral_Omentum	ENSG00000011523.13	CEP68	10.7124628109047	0.274233	0.0255995	1.04937e-23	8.54622e-05	6.67095e-12
rs576123	Thyroid	ENSG00000175164.13	ABO	-10.5360899071305	0.443477	0.0420912	1.35765e-23	0.000112132
rs576123	Adipose_Subcutaneous	ENSG00000175164.13	ABO	-10.4858109634317	0.436192	0.0415984	1.97136e-23	0.000108157
rs13737	Liver	ENSG00000140400.16	MAN2C1	11.6723803752116	-0.69085	0.0591867	1.97365e-23	8.23823e-05	7.65773e-21
rs3111316	Muscle_Skeletal	ENSG00000105607.12	GCDH	-10.3718330233653	-0.228165	0.0219986	2.15779e-23	0.00018715	0.0725585
rs291367	Adipose_Subcutaneous	ENSG00000162885.12	B3GALNT2	-10.4365947957658	-0.348418	0.0333842	3.02395e-23	0.000144007	0.133941
rs11642430	Colon_Transverse	ENSG00000090238.11	YPEL3	10.8214148212822	0.277275	0.0256228	3.08069e-23	0.000188977	4.29255e-07
rs62482405	Thyroid	ENSG00000161048.11	NAPEPLD	10.3803944169804	0.585969	0.0564496	5.23657e-23	0.000286859	0.00346759
rs1580278	Colon_Transverse	ENSG00000164039.14	BDH2	10.6732897015256	-0.439867	0.041212	9.7974e-23	0.000145937	0.0832413
rs11642430	Muscle_Skeletal	ENSG00000149922.10	TBX6	10.1943314694129	0.310542	0.0304622	1.04711e-22	0.000344551	0.0179431
rs4148856	Adipose_Visceral_Omentum	ENSG00000111328.6	CDK2AP1	10.3873719739973	0.31223	0.0300586	1.56943e-22	0.000187812	4.08058e-12
rs3111316	Whole_Blood	ENSG00000105607.12	GCDH	-10.1499975704553	-0.216885	0.021368	1.9064e-22	0.000133023	0.0892348
rs8046545	Adipose_Subcutaneous	ENSG00000197165.10	SULT1A2	-10.21480598865	0.436838	0.0427652	2.04647e-22	0.000201384	4.17141e-16
rs2028150	Thyroid	ENSG00000204929.12	AC074391.1	-10.2152876923098	0.49281	0.0482424	2.16131e-22	0.000178729	0.0373657
rs1061810	Adipose_Subcutaneous	ENSG00000246250.2	RP11-613D13.5	-10.1740770837355	-0.372511	0.0366138	2.8991e-22	0.00016893	0.719127
rs11642430	Whole_Blood	ENSG00000102882.11	MAPK3	-10.0995076436769	-0.149038	0.014757	2.96236e-22	0.000308955	0.0655531
rs7124681	Colon_Transverse	ENSG00000172247.3	C1QTNF4	-10.5285937857938	-0.334896	0.0318082	3.01338e-22	0.000391861	0.401171
rs4148856	Colon_Transverse	ENSG00000111328.6	CDK2AP1	10.5226338968967	0.25372	0.0241118	3.15566e-22	0.000158793	5.3089e-17
rs96844	Pancreas	ENSG00000155542.11	SETD9	10.6659387437991	-0.671652	0.0629717	3.90422e-22	7.15782e-05	3.48252e-08
rs7124681	Adipose_Visceral_Omentum	ENSG00000172247.3	C1QTNF4	-10.2600756204471	-0.407243	0.039692	4.46985e-22	0.000484177	0.108701
rs2727301	Thyroid	ENSG00000108592.16	FTSJ3	10.1272048210604	-0.332023	0.0327853	4.57712e-22	0.000334956	1.3123e-06
rs7978610	Thyroid	ENSG00000179195.15	ZNF664	-10.1052281729638	0.283367	0.0280416	5.51589e-22	0.000165532	0.0121619
rs12920022	Adipose_Subcutaneous	ENSG00000167526.13	RPL13	-10.0422434380504	-0.21343	0.0212533	8.89564e-22	0.000184045
rs8046545	Thyroid	ENSG00000251417.2	RP11-1348G14.4	10.0293698025456	-0.417737	0.0416514	1.04813e-21	0.000280997	0.000305497
rs11642430	Adipose_Visceral_Omentum	ENSG00000090238.11	YPEL3	10.1447548199516	0.235322	0.0231964	1.14642e-21	0.00020781	0.00438397
rs4776970	Thyroid	ENSG00000188779.10	SKOR1	-10.0184893287092	0.295205	0.029466	1.14893e-21	0.000205561	0.999987
rs576123	Pancreas	ENSG00000175164.13	ABO	-10.483053316726	0.741465	0.0707299	1.50284e-21	3.92038e-05
rs3768321	Adipose_Subcutaneous	ENSG00000090621.13	PABPC4	-9.96326465821449	-0.277337	0.027836	1.73339e-21	0.000195816	0.00235406
rs1580278	Pituitary	ENSG00000164039.14	BDH2	10.7177511817684	-0.526477	0.049122	2.06952e-21	9.13625e-05	0.238208
rs11642430	Muscle_Skeletal	ENSG00000149926.13	FAM57B	-9.84497163627825	-0.275918	0.0280263	2.21675e-21	0.000364899	0.0161357
rs7124681	Whole_Blood	ENSG00000172247.3	C1QTNF4	-9.81362997696814	-0.395797	0.0403314	3.49104e-21	0.000619769	2.89288e-09
rs2268382	Adipose_Subcutaneous	ENSG00000106484.14	MEST	-9.84633483282532	-0.243102	0.0246896	4.62453e-21	0.000157731	0.193551
rs1708302	Muscle_Skeletal	ENSG00000153814.11	JAZF1	9.75533914768242	-0.290547	0.0297834	4.79212e-21	0.000161924	0.0808208
rs4148856	Pancreas	ENSG00000111328.6	CDK2AP1	10.3212879010546	0.468297	0.045372	4.91519e-21	0.000141987	1.11093e-16
rs2727301	Pancreas	ENSG00000198231.12	DDX42	-10.3184141740754	0.369715	0.0358306	5.01943e-21	0.000125286	1.38445e-12
rs11070332	Adipose_Subcutaneous	ENSG00000103932.11	RPAP1	-9.82901663371798	-0.236345	0.0240457	5.34447e-21	0.000325638	0.885312
rs1580278	Colon_Sigmoid	ENSG00000164039.14	BDH2	10.2526054222443	-0.469068	0.0457511	5.71354e-21	0.00013778	0.975496
rs34855406	Adipose_Subcutaneous	ENSG00000037042.8	TUBG2	-9.7942980411348	-0.291412	0.0297533	7.1393e-21	0.0003251	4.27289e-06
rs862320	Thyroid	ENSG00000102908.20	NFAT5	-9.79043778565389	0.190968	0.0195055	7.75504e-21	0.000488977	0.0626726
rs3115960	Colon_Sigmoid	ENSG00000261783.1	RP11-252K23.2	-10.1915951190039	0.654926	0.0642614	8.96499e-21	9.25953e-05	2.21615e-09
rs601945	Whole_Blood	ENSG00000232629.8	HLA-DQB2	9.69789474464022	0.556177	0.0573502	9.3437e-21	0.000204881	0.0425499
rs8046545	Muscle_Skeletal	ENSG00000260442.5	ATP2A1-AS1	9.67273606188949	-0.335863	0.0347227	9.70794e-21	0.000247265	4.40985e-12
rs12578639	Muscle_Skeletal	ENSG00000176871.8	WSB2	9.66336865257527	-0.265828	0.0275088	1.05142e-20	0.000125493	0.0854508
rs7978610	Adipose_Subcutaneous	ENSG00000250091.2	DNAH10OS	9.73083873868799	-0.342604	0.0352081	1.20988e-20	0.000149699	7.61659e-09
rs96844	Adipose_Subcutaneous	ENSG00000155542.11	SETD9	9.73024853807412	-0.356384	0.0366264	1.21581e-20	0.000136326	2.07706e-07
rs13737	Whole_Blood	ENSG00000260274.1	RP11-817O13.8	9.64236060217067	-0.366994	0.0380606	1.49418e-20	0.000260284	3.30003e-11
rs3111316	Thyroid	ENSG00000161860.7	SYCE2	9.65064549544562	0.342335	0.0354727	2.46427e-20	0.000197431	0.512209
rs7978610	Colon_Sigmoid	ENSG00000250091.2	DNAH10OS	10.0355166213635	-0.457073	0.0455455	2.82374e-20	8.02933e-05	0.000450148
rs2052261	Muscle_Skeletal	ENSG00000011523.13	CEP68	9.43663531817787	0.231735	0.0245569	7.12871e-20	0.000136331	1.67053e-13
rs3111316	Muscle_Skeletal	ENSG00000105612.8	DNASE2	-9.42318028576687	-0.310956	0.0329991	7.97784e-20	0.000174069	0.00810863
rs291367	Whole_Blood	ENSG00000162885.12	B3GALNT2	-9.41271313607367	-0.306872	0.0326018	1.02005e-19	9.64563e-05	0.00108005
rs4688760	Adipose_Visceral_Omentum	ENSG00000004534.14	RBM6	-9.57102900236662	-0.296399	0.0309683	1.13274e-19	0.000601215	0.999568
rs2249105	Colon_Transverse	ENSG00000011523.13	CEP68	-9.71821184016117	0.173907	0.017895	1.42798e-19	6.63234e-05	0.00201385
rs13737	Thyroid	ENSG00000169375.15	SIN3A	9.42007735994121	-0.230644	0.0244843	1.61899e-19	0.00040842	4.06181e-12
rs62007683	Pituitary	ENSG00000075413.17	MARK3	10.0635561486986	-0.4839	0.0480844	1.73662e-19	6.41499e-05	0.000121479
rs2727301	Colon_Transverse	ENSG00000108592.16	FTSJ3	9.61021020363887	-0.465432	0.048431	3.18746e-19	0.000146128	0.00068193
rs3751837	Colon_Sigmoid	ENSG00000167984.17	NLRC3	-9.68662682911232	-0.722562	0.0745937	3.5688e-19	6.70744e-05	0.33705
rs1580278	Stomach	ENSG00000164039.14	BDH2	9.6679988695839	-0.467884	0.0483951	3.59765e-19	9.64446e-05	0.000132339
rs11496066	Stomach	ENSG00000161040.16	FBXL13	-9.65092196531417	0.400702	0.0415196	4.07158e-19	8.64209e-05	0.522644
rs11642430	Colon_Sigmoid	ENSG00000090238.11	YPEL3	9.65101549658328	0.276456	0.0286453	4.61309e-19	0.000170036	0.0165888
rs2767036	Colon_Transverse	ENSG00000149089.12	APIP	9.55391609461661	-0.586893	0.0614295	4.83536e-19	7.31778e-05	0.00685182
rs1061810	Liver	ENSG00000149084.12	HSD17B12	-10.099723582757	-0.419737	0.0415593	4.86105e-19	3.99794e-05	0.163563
rs80147536	Thyroid	ENSG00000234936.1	AC010883.5	9.28207519747073	-0.486107	0.0523705	4.92208e-19	0.000248347	0.274818
rs4688760	Colon_Transverse	ENSG00000004534.14	RBM6	-9.54992419609269	-0.39853	0.0417312	4.98015e-19	0.000469186	0.997988
rs7124681	Muscle_Skeletal	ENSG00000109919.9	MTCH2	9.19911627480884	0.163849	0.0178114	5.10757e-19	0.000726195	2.43535e-14
rs12811407	Whole_Blood	ENSG00000112787.12	FBRSL1	9.20340055133352	0.189432	0.0205829	5.70562e-19	0.000163707	2.21078e-05
rs2727301	Muscle_Skeletal	ENSG00000108592.16	FTSJ3	9.18186289436961	-0.252659	0.0275172	5.88446e-19	0.000297501	8.06629e-08
rs62007683	Pancreas	ENSG00000075413.17	MARK3	9.63644875511646	-0.335821	0.0348491	6.82924e-19	5.7475e-05	2.59496e-08
rs340874	Pancreas	ENSG00000274895.1	RP11-478J18.2	9.61860647869908	0.602267	0.0626148	7.75116e-19	7.43135e-05	0.999998
rs12642790	Pituitary	ENSG00000249242.7	TMEM150C	9.79013708878103	-0.478489	0.0488746	1.07932e-18	5.91964e-05
rs576123	Colon_Sigmoid	ENSG00000175164.13	ABO	-9.53217578859873	0.37337	0.0391695	1.08296e-18	4.34589e-05
rs3751837	Muscle_Skeletal	ENSG00000167984.17	NLRC3	-9.0614339584058	-0.368401	0.0406559	1.57228e-18	0.000129199	0.988423
rs3111316	Adipose_Subcutaneous	ENSG00000105607.12	GCDH	-9.12391521380581	-0.169846	0.0186155	1.66901e-18	0.000164139	0.0991675
rs4930091	Whole_Blood	ENSG00000110665.11	C11orf21	-9.06118858853672	-0.260922	0.0287956	1.80835e-18	9.14287e-05	0.000457153
rs62007683	Thyroid	ENSG00000126214.21	KLC1	9.10215306496378	-0.266611	0.029291	2.06238e-18	0.000196554	0.0785152
rs4281707	Whole_Blood	ENSG00000103479.15	RBL2	-9.02991977146306	0.127722	0.0141444	2.32629e-18	0.000118242	0.000315636
rs3751837	Colon_Sigmoid	ENSG00000103351.12	CLUAP1	9.36074681378027	0.468686	0.0500693	3.67659e-18	7.95682e-05	0.0256317
rs13737	Colon_Sigmoid	ENSG00000260274.1	RP11-817O13.8	9.35920637170688	-0.435365	0.0465173	3.71701e-18	0.000153982	1.51046e-11
rs3751837	Pituitary	ENSG00000167984.17	NLRC3	-9.60312326745186	-0.663875	0.0691312	3.73035e-18	4.9927e-05	0.996804
rs7124681	Whole_Blood	ENSG00000134571.10	MYBPC3	-8.94742881533301	-0.160849	0.0179771	4.50701e-18	0.000679383	0.00441181
rs4925109	Muscle_Skeletal	ENSG00000175662.17	TOM1L2	8.92895464024977	-0.208073	0.0233031	4.58333e-18	0.000270722	0.99198
rs4688760	Pancreas	ENSG00000004534.14	RBM6	-9.36238399848413	-0.440995	0.0471028	4.72147e-18	0.000374922	0.99035
rs2028150	Thyroid	ENSG00000281920.1	RP11-418H16.1	-8.99086468431225	0.439047	0.0488326	4.95447e-18	0.000204955	0.00275496
rs1708302	Pancreas	ENSG00000153814.11	JAZF1	9.35374731482028	-0.471737	0.050433	5.01603e-18	5.51112e-05	0.000632872
rs4688760	Whole_Blood	ENSG00000182179.12	UBA7	-8.92866373569474	-0.166746	0.0186753	5.23545e-18	0.000877088	0.999192
rs2249105	Pancreas	ENSG00000011523.13	CEP68	-9.32792607533296	0.441605	0.0473423	6.00998e-18	5.92776e-05	0.0117219
rs12640250	Thyroid	ENSG00000163257.10	DCAF16	-8.95585591854504	-0.214041	0.0238996	6.51712e-18	0.000286418	0.0437708
rs3751837	Whole_Blood	ENSG00000103351.12	CLUAP1	8.89363415939026	0.280599	0.0315506	6.92059e-18	0.00011664	0.999365
rs10937721	Muscle_Skeletal	ENSG00000109501.13	WFS1	8.86918824828164	0.308102	0.0347385	7.398e-18	7.5123e-05	0.000306123
rs13737	Colon_Transverse	ENSG00000260274.1	RP11-817O13.8	9.1738478693689	-0.374189	0.0407887	7.79518e-18	0.000165643	2.19801e-19
rs8046545	Liver	ENSG00000197272.2	IL27	-9.61108007869569	0.408398	0.0424925	1.05944e-17	4.29463e-05	6.47305e-07
rs1796330	Muscle_Skeletal	ENSG00000258053.1	CTD-2021H9.3	-8.82407559683794	0.332289	0.0376571	1.06015e-17	0.000197227	0.00706456
rs11642430	Colon_Transverse	ENSG00000169592.14	INO80E	-9.112399040847	-0.333306	0.0365772	1.21503e-17	0.000153057	0.0703512
rs7124681	Liver	ENSG00000172247.3	C1QTNF4	-9.55360686726274	-0.659374	0.0690184	1.5183e-17	0.000125436	1.07693e-07
rs11642430	Pituitary	ENSG00000090238.11	YPEL3	9.37411369973552	0.419239	0.044723	1.68426e-17	0.000132089	0.184161
rs2767036	Adipose_Subcutaneous	ENSG00000149089.12	APIP	8.81747441662522	-0.36083	0.0409221	1.84644e-17	0.000137551	0.00728284
rs3115960	Small_Intestine_Terminal_Ileum	ENSG00000261783.1	RP11-252K23.2	-9.80547064128444	0.759572	0.0774641	1.92487e-17	4.53413e-05	0.0170165
rs3751837	Colon_Transverse	ENSG00000103351.12	CLUAP1	9.04838300854863	0.269249	0.0297566	1.92599e-17	7.53246e-05	0.112748
rs6884702	Adipose_Subcutaneous	ENSG00000272335.1	RP11-53O19.3	-8.80672872205986	-0.252165	0.0286332	2.00669e-17	0.000502211	2.23503e-08
rs34855406	Thyroid	ENSG00000037042.8	TUBG2	-8.80494017618429	-0.225211	0.0255778	2.10643e-17	0.000361215	7.68102e-07
rs13737	Adipose_Visceral_Omentum	ENSG00000260274.1	RP11-817O13.8	8.87207791679196	-0.364329	0.0410646	2.44083e-17	0.000209901	3.28368e-19
rs8046545	Stomach	ENSG00000197165.10	SULT1A2	-9.04714716216885	0.574621	0.063514	3.02197e-17	8.375e-05	1.72375e-09
rs11070332	Muscle_Skeletal	ENSG00000103932.11	RPAP1	-8.67780606142108	-0.160006	0.0184385	3.37147e-17	0.000295414	0.831017
rs11926707	Thyroid	ENSG00000160796.16	NBEAL2	-8.73677524864818	-0.237737	0.0272111	3.5617e-17	0.000583043	0.36729
rs57235767	Thyroid	ENSG00000165325.13	DEUP1	8.70676925466454	-0.402695	0.0462508	4.48406e-17	0.000302006	0.29486
rs1316776	Colon_Sigmoid	ENSG00000145692.14	BHMT	8.99372446390041	-0.605905	0.0673697	4.85442e-17	7.75966e-05	0.00478216
rs7978610	Adipose_Subcutaneous	ENSG00000119242.8	CCDC92	8.68951970027102	-0.248187	0.0285617	4.95109e-17	0.000169734	0.0194134
rs3115960	Stomach	ENSG00000261783.1	RP11-252K23.2	-8.94284390307715	0.657885	0.0735655	6.27025e-17	6.33925e-05	1.05824e-11
rs13737	Muscle_Skeletal	ENSG00000140400.16	MAN2C1	8.59407555477903	-0.173933	0.0202388	6.49466e-17	0.000349323	0.000214794
rs62007683	Pancreas	ENSG00000166165.12	CKB	8.98152113607449	-0.440471	0.0490419	6.6408e-17	6.79318e-05	0.0476702
rs576123	Colon_Transverse	ENSG00000175164.13	ABO	-8.86351119590801	0.225093	0.0253954	7.21218e-17	4.75206e-05
rs7978610	Muscle_Skeletal	ENSG00000250091.2	DNAH10OS	8.55454752572113	-0.30224	0.0353309	8.83572e-17	0.000175859	6.3461e-06
rs4688760	Stomach	ENSG00000004534.14	RBM6	-8.87169794679359	-0.378903	0.0427092	1.029e-16	0.000321491	0.952631
rs601945	Muscle_Skeletal	ENSG00000179344.16	HLA-DQB1	-8.51681039800057	-0.499961	0.0587028	1.18421e-16	0.000297955	0.0359271
rs13737	Whole_Blood	ENSG00000169371.13	SNUPN	8.5195142162103	-0.21116	0.0247854	1.29464e-16	0.000301517	0.00177975
rs2249105	Thyroid	ENSG00000011523.13	CEP68	-8.56761684058689	0.211945	0.0247379	1.29497e-16	0.000189524	0.0150476
rs3115960	Pituitary	ENSG00000261783.1	RP11-252K23.2	-9.01507293828585	0.661304	0.0733553	1.74192e-16	6.34204e-05	6.8354e-12
rs5213	Thyroid	ENSG00000260196.1	RP1-239B22.5	8.52087761060112	-0.299511	0.0351502	1.84403e-16	0.000228051
rs601945	Small_Intestine_Terminal_Ileum	ENSG00000237541.3	HLA-DQA2	9.37225023355245	1.01939	0.108767	2.31996e-16	6.73795e-05	0.00557516
rs2972144	Adipose_Subcutaneous	ENSG00000169047.5	IRS1	-8.47336207653002	-0.300813	0.035501	2.55914e-16	0.000160937	0.0319015
rs11642430	Thyroid	ENSG00000149922.10	TBX6	8.46747309315111	0.231669	0.0273599	2.7569e-16	0.000435322	0.00667206
rs11070332	Adipose_Visceral_Omentum	ENSG00000103932.11	RPAP1	-8.53614028334523	-0.207389	0.0242954	2.94042e-16	0.000200394	0.916696
rs1061810	Liver	ENSG00000283375.1	RP11-613D13.10	-9.04550150624588	-0.585964	0.0647796	3.55679e-16	3.70432e-05	0.228651
rs2102278	Thyroid	ENSG00000109184.14	DCUN1D4	8.4115473095088	0.159364	0.0189458	4.19245e-16	0.000884059	2.18839e-05
rs10097617	Whole_Blood	ENSG00000164938.13	TP53INP1	-8.35991069010729	0.106633	0.0127553	4.38723e-16	0.000139679	0.116467
rs11642430	Stomach	ENSG00000090238.11	YPEL3	8.66100525359207	0.323513	0.0373528	4.40729e-16	0.00012687	0.0203673
rs12640250	Adipose_Visceral_Omentum	ENSG00000163257.10	DCAF16	-8.45949515773348	-0.254198	0.0300489	5.14208e-16	0.000129265	0.402018
rs8046545	Adipose_Subcutaneous	ENSG00000184110.14	EIF3C	-8.37217872525124	0.371607	0.044386	5.46437e-16	0.000222282	0.352491
rs3115960	Pancreas	ENSG00000261783.1	RP11-252K23.2	-8.6711998507229	0.666744	0.0768918	5.50013e-16	7.83717e-05	8.5031e-13
rs11642430	Whole_Blood	ENSG00000090238.11	YPEL3	8.28967168884264	0.124852	0.0150611	7.46492e-16	0.000251187	0.0586523
rs4148856	Adipose_Visceral_Omentum	ENSG00000130921.7	C12orf65	8.40783123491733	0.264973	0.031515	7.48044e-16	0.000188145	0.0223828
rs7022807	Adipose_Visceral_Omentum	ENSG00000147874.10	HAUS6	-8.33224662695961	-0.303153	0.0363831	1.29085e-15	7.95763e-05	0.000691263
rs5213	Adipose_Subcutaneous	ENSG00000188211.8	NCR3LG1	8.24398013482936	-0.280773	0.034058	1.41506e-15	0.000245327
rs340874	Pituitary	ENSG00000274895.1	RP11-478J18.2	8.66672102241266	0.380662	0.0439223	1.62328e-15	5.3854e-05	1
rs7978610	Adipose_Visceral_Omentum	ENSG00000250091.2	DNAH10OS	8.28559977287489	-0.422599	0.0510041	1.80462e-15	9.29143e-05	2.01589e-07
rs11070332	Muscle_Skeletal	ENSG00000137806.8	NDUFAF1	-8.15325872749853	-0.309864	0.0380049	1.88956e-15	0.000331328	0.748235
rs1580278	Pancreas	ENSG00000164039.14	BDH2	8.44237052290253	-0.473409	0.0560754	2.55139e-15	0.00011512	0.999893
rs6458354	Thyroid	ENSG00000283215.1	RP11-344J7.4	8.16149956749775	-0.439953	0.053906	2.66439e-15	0.000176235	0.0552399
rs3115960	Whole_Blood	ENSG00000261783.1	RP11-252K23.2	-8.11287983857101	0.390188	0.0480949	2.80154e-15	0.000124785	4.55578e-07
rs12719778	Whole_Blood	ENSG00000160959.7	LRRC14	-8.08990868356532	0.161798	0.02	3.32142e-15	0.000177045	0.378757
rs8046545	Adipose_Subcutaneous	ENSG00000178188.14	SH2B1	8.1210461797074	-0.175058	0.0215561	3.4883e-15	0.000261003	2.11984e-06
rs8046545	Whole_Blood	ENSG00000233232.6	NPIPB7	8.07734349498826	-0.351773	0.0435506	3.64497e-15	0.000181912	1.12177e-06
rs3111316	Thyroid	ENSG00000105607.12	GCDH	-8.11195390190625	-0.265777	0.0327636	3.82484e-15	0.00018176	0.435255
rs1796330	Colon_Transverse	ENSG00000258053.1	CTD-2021H9.3	-8.29127523361081	0.229829	0.0277194	3.88936e-15	0.000105456	0.184571
rs8046545	Adipose_Subcutaneous	ENSG00000178952.10	TUFM	-8.09128255332632	0.187644	0.0231909	4.33335e-15	0.000243966	3.09074e-08
rs2727301	Stomach	ENSG00000108592.16	FTSJ3	8.31592972798092	-0.374956	0.0450889	4.58079e-15	0.000103017	0.000917721
rs2727301	Colon_Sigmoid	ENSG00000108592.16	FTSJ3	8.28994600822165	-0.437121	0.0527291	5.88139e-15	0.000134505	0.000131709
rs7124681	Small_Intestine_Terminal_Ileum	ENSG00000172247.3	C1QTNF4	-8.76351898798297	-0.511447	0.0583609	7.38278e-15	0.000176644	0.0799052
rs825452	Adipose_Subcutaneous	ENSG00000119242.8	CCDC92	-8.0129732182206	-0.228821	0.0285564	7.64653e-15	0.000169734	0.0578427
rs7978610	Colon_Transverse	ENSG00000250091.2	DNAH10OS	8.17052706854563	-0.236231	0.0289125	8.84242e-15	8.90939e-05	2.38791e-07
rs11642430	Pancreas	ENSG00000090238.11	YPEL3	8.24134214088192	0.276007	0.0334906	9.64685e-15	0.000134162	0.000807549
rs2727301	Whole_Blood	ENSG00000108604.15	SMARCD2	7.93377871425642	-0.122861	0.0154858	1.04586e-14	0.000256588	1.4497e-08
rs5213	Adipose_Subcutaneous	ENSG00000260196.1	RP1-239B22.5	7.96945252690835	-0.305363	0.0383167	1.04655e-14	0.000183133
rs7115753	Whole_Blood	ENSG00000121653.11	MAPK8IP1	-7.92827827368412	0.320089	0.0403731	1.08864e-14	0.000223822	5.37438e-06
rs12920022	Thyroid	ENSG00000167526.13	RPL13	-7.96640897895016	-0.179444	0.0225251	1.09585e-14	0.000218852
rs9430095	Pancreas	ENSG00000266028.7	SRGAP2	8.21926053410295	0.33516	0.0407774	1.11525e-14	5.62778e-05	0.358332
rs601945	Whole_Blood	ENSG00000196126.11	HLA-DRB1	-7.91832136457419	-0.186414	0.0235421	1.17052e-14	0.000222789	0.351455
rs6600191	Adipose_Subcutaneous	ENSG00000167930.15	FAM234A	-7.95322083272951	0.211411	0.0265818	1.17612e-14	0.000145731	0.000651985
rs4148856	Thyroid	ENSG00000111328.6	CDK2AP1	7.94777697239892	0.222951	0.028052	1.25264e-14	0.000377784	1.20773e-07
rs7022807	Adipose_Subcutaneous	ENSG00000155875.13	SAXO1	-7.94362838688606	-0.390615	0.0491733	1.26e-14	0.000127843	0.00368463
rs4804833	Thyroid	ENSG00000142459.8	EVI5L	-7.93321219482523	0.192777	0.0243	1.39044e-14	0.000137232	0.0145692
rs291367	Adipose_Visceral_Omentum	ENSG00000162885.12	B3GALNT2	-7.99469181282504	-0.292576	0.0365963	1.41641e-14	8.78941e-05	0.36946
rs59944054	Muscle_Skeletal	ENSG00000171700.13	RGS19	-7.84732957585126	-0.307338	0.0391646	1.80592e-14	0.000198379	0.000539978
rs8046545	Pituitary	ENSG00000251417.2	RP11-1348G14.4	8.26752367024021	-0.473788	0.0573071	2.00005e-14	7.87856e-05	0.0629829
rs1316776	Muscle_Skeletal	ENSG00000132840.9	BHMT2	7.82975233484414	-0.339536	0.0433649	2.05174e-14	0.000186463	0.0287477
rs6600191	Muscle_Skeletal	ENSG00000076344.15	RGS11	7.8288065306098	-0.383478	0.048983	2.06586e-14	0.000126502	0.0369573
rs4925109	Pituitary	ENSG00000175662.17	TOM1L2	8.25741613602482	-0.448914	0.0543649	2.12989e-14	0.000107149	0.818966
rs649961	Pancreas	ENSG00000221955.10	SLC12A8	8.11636564413397	-0.337685	0.0416054	2.18598e-14	7.68389e-05	0.259325
rs1641523	Whole_Blood	ENSG00000239697.10	TNFSF12	7.81076476345284	-0.201401	0.0257851	2.55045e-14	0.000101677	0.00694577
rs4148856	Thyroid	ENSG00000051825.14	MPHOSPH9	-7.84759682748253	-0.230898	0.0294227	2.56054e-14	0.000417428	5.89157e-07
rs7178762	Muscle_Skeletal	ENSG00000197361.7	FBXL22	7.79796986041872	-0.18505	0.0237305	2.58278e-14	0.000226735	0.0108435
rs8046545	Colon_Sigmoid	ENSG00000251417.2	RP11-1348G14.4	8.05900811458539	-0.446086	0.0553525	2.70808e-14	0.000118453	0.329682
rs3751837	Pancreas	ENSG00000103351.12	CLUAP1	8.0428809585458	0.520275	0.0646877	3.52476e-14	5.43342e-05	0.032016
rs3111316	Pancreas	ENSG00000179115.10	FARSA	-8.03939012029229	-0.238846	0.0297094	3.60545e-14	7.4201e-05	0.510269
rs2767036	Colon_Sigmoid	ENSG00000149089.12	APIP	7.99465804425199	-0.573522	0.0717382	4.12611e-14	7.91628e-05	0.0285962
rs2727301	Adipose_Visceral_Omentum	ENSG00000108592.16	FTSJ3	7.83525645012913	-0.372294	0.0475153	4.28708e-14	0.000175125	7.10419e-05
rs3115960	Muscle_Skeletal	ENSG00000261783.1	RP11-252K23.2	-7.71503512078077	0.368263	0.0477332	4.69264e-14	0.000158394	2.05299e-05
rs4925109	Adipose_Subcutaneous	ENSG00000175662.17	TOM1L2	7.73185699252017	-0.184667	0.023884	5.67508e-14	0.000260937	0.650435
rs11926707	Thyroid	ENSG00000188086.13	PRSS45	-7.73148776646465	-0.335786	0.0434309	5.81428e-14	0.000483727	1
rs2767036	Stomach	ENSG00000149089.12	APIP	7.92809938689179	-0.49101	0.0619328	5.96383e-14	5.05392e-05	0.00722381
rs34855406	Pancreas	ENSG00000108797.11	CNTNAP1	7.91713014693032	0.529685	0.0669037	7.93815e-14	0.000138722	0.00431266
rs7124681	Thyroid	ENSG00000172247.3	C1QTNF4	-7.68029931840804	-0.282259	0.0367511	8.32223e-14	0.000747997	0.119995
rs8046545	Adipose_Visceral_Omentum	ENSG00000251417.2	RP11-1348G14.4	7.73207324130708	-0.389836	0.0504181	8.70568e-14	0.000149097	0.277783
rs1316776	Adipose_Subcutaneous	ENSG00000145692.14	BHMT	7.66472229254289	-0.339551	0.0443005	9.08604e-14	0.000176735	0.0284184
rs62007683	Colon_Transverse	ENSG00000075413.17	MARK3	7.81981048290996	-0.299244	0.0382675	9.21167e-14	8.87441e-05	0.000131971
rs2767036	Pancreas	ENSG00000149089.12	APIP	7.85768282328819	-0.54462	0.0693105	1.16225e-13	7.08475e-05	0.0156352
rs1316776	Thyroid	ENSG00000145692.14	BHMT	7.63178821979535	-0.375867	0.0492502	1.16711e-13	0.0002134	0.0149359
rs3772071	Colon_Sigmoid	ENSG00000115221.10	ITGB6	-7.82110134492691	-0.432254	0.0552676	1.27205e-13	0.000182529	9.73957e-05
rs96844	Small_Intestine_Terminal_Ileum	ENSG00000155542.11	SETD9	8.24825319676896	-0.704586	0.0854224	1.3197e-13	3.8118e-05	1.2797e-07
rs7022807	Adipose_Subcutaneous	ENSG00000147874.10	HAUS6	-7.6099478331824	-0.219115	0.0287932	1.33087e-13	0.000137531	0.00212268
rs2249105	Stomach	ENSG00000011523.13	CEP68	-7.79631428799067	0.261463	0.0335367	1.40322e-13	4.89786e-05	0.00132169
rs2581787	Adipose_Subcutaneous	ENSG00000163935.13	SFMBT1	7.59558805783956	0.319151	0.0420179	1.47043e-13	0.000289883	0.304736
rs601945	Adipose_Subcutaneous	ENSG00000179344.16	HLA-DQB1	-7.59405415720104	-0.50239	0.0661556	1.48616e-13	0.00022505	0.0253707
rs1317617	Liver	ENSG00000108179.13	PPIF	-8.04026981565288	0.495728	0.0616557	1.52711e-13	3.3605e-05	6.05088e-05
rs601945	Adipose_Subcutaneous	ENSG00000196735.11	HLA-DQA1	-7.58899128850084	-0.400608	0.0527881	1.53928e-13	0.000252106	0.110865
rs11642430	Whole_Blood	ENSG00000149922.10	TBX6	7.55707365881521	0.28451	0.0376482	1.54865e-13	0.000263744	0.0143734
rs1783541	Whole_Blood	ENSG00000168056.15	LTBP3	7.53045332915488	0.145931	0.0193788	1.86621e-13	0.000251701	0.148663
rs4688760	Pituitary	ENSG00000004534.14	RBM6	-7.8981888897079	-0.436879	0.0553139	1.94495e-13	0.00030241	0.623575
rs4776970	Adipose_Subcutaneous	ENSG00000188779.10	SKOR1	-7.54731242603017	0.23371	0.0309659	2.05387e-13	0.000175935	0.999381
rs2767036	Adipose_Visceral_Omentum	ENSG00000149089.12	APIP	7.58785755139893	-0.305723	0.040291	2.31699e-13	8.63874e-05	0.0235066
rs59944054	Pancreas	ENSG00000125510.15	OPRL1	-7.74197647152898	-0.58176	0.0751436	2.42951e-13	8.58989e-05	0.000107064
rs11642430	Pituitary	ENSG00000169592.14	INO80E	-7.84566773212253	-0.397617	0.0506798	2.6768e-13	0.000106536	7.90487e-05
rs2727301	Whole_Blood	ENSG00000108592.16	FTSJ3	7.46704405848645	-0.210307	0.0281647	2.90407e-13	0.000253942	0.000312224
rs59944054	Stomach	ENSG00000171700.13	RGS19	-7.68218251978815	-0.304299	0.039611	2.92357e-13	5.73166e-05	0.385138
rs3111316	Muscle_Skeletal	ENSG00000105610.4	KLF1	-7.45388268911079	-0.313678	0.0420825	2.97505e-13	0.000187024	0.0234644
rs4932265	Muscle_Skeletal	ENSG00000157823.16	AP3S2	-7.45191485831802	0.148119	0.0198767	3.01616e-13	0.000154266	0.0242668
rs2727301	Pituitary	ENSG00000108592.16	FTSJ3	7.80734309930974	-0.491936	0.0630094	3.3771e-13	9.00972e-05	0.000112504
rs8046545	Colon_Sigmoid	ENSG00000178952.10	TUFM	-7.66256514081245	0.265248	0.0346161	3.51217e-13	0.000127112	1.39272e-08
rs291367	Thyroid	ENSG00000162885.12	B3GALNT2	-7.46985041336455	-0.23732	0.0317704	3.56653e-13	0.000170887	0.309416
rs8107974	Whole_Blood	ENSG00000129933.20	MAU2	-7.42502090652846	-0.179008	0.0241087	3.88657e-13	0.000183209	0.117887
rs4688760	Adipose_Subcutaneous	ENSG00000186792.16	HYAL3	-7.44471115051266	-0.32826	0.0440931	4.15585e-13	0.000855764	0.745409
rs4688760	Adipose_Visceral_Omentum	ENSG00000186792.16	HYAL3	-7.49866902073273	-0.366658	0.0488964	4.21663e-13	0.000522057	0.0933683
rs1641523	Muscle_Skeletal	ENSG00000170175.10	CHRNB1	-7.39594177026582	0.227977	0.0308247	4.45075e-13	0.000119038	0.00237739
rs576123	Liver	ENSG00000175164.13	ABO	-7.85521623010763	0.680338	0.0866097	4.5198e-13	2.19574e-05
rs862320	Thyroid	ENSG00000157322.17	CLEC18A	7.43370688525043	-0.416728	0.0560592	4.56494e-13	0.000443265	0.0252987
rs3768321	Pancreas	ENSG00000228060.1	RP11-69E11.8	-7.63122311471438	-0.638677	0.0836926	4.89138e-13	8.2555e-05	0.997377
rs8046545	Whole_Blood	ENSG00000196502.11	SULT1A1	7.34928796470913	-0.254131	0.0345791	6.54951e-13	0.000187951	0.000419783
rs5213	Thyroid	ENSG00000188211.8	NCR3LG1	7.34620718492621	-0.193778	0.026378	8.26552e-13	0.000264323
rs12719778	Whole_Blood	ENSG00000161016.17	RPL8	7.31199556257533	-0.0966328	0.0132156	8.45529e-13	0.000237632	1.14869e-05
rs62007683	Adipose_Subcutaneous	ENSG00000075413.17	MARK3	7.33591752231892	-0.29161	0.0397509	8.70329e-13	0.000188156	0.0109713
rs4281707	Muscle_Skeletal	ENSG00000103479.15	RBL2	-7.29771029536391	0.120184	0.0164687	8.75981e-13	0.000125229	8.42283e-07
rs76895963	Muscle_Skeletal	ENSG00000118971.7	CCND2	7.28892776416739	-0.634359	0.0870305	9.30316e-13	9.58063e-05
rs4925109	Adipose_Visceral_Omentum	ENSG00000175662.17	TOM1L2	7.37283388219771	-0.188781	0.025605	9.72922e-13	0.000168538	0.608502
rs4688760	Thyroid	ENSG00000186792.16	HYAL3	-7.31324933465753	-0.324626	0.0443887	1.03223e-12	0.0010352	0.0334679
rs8046545	Colon_Transverse	ENSG00000251417.2	RP11-1348G14.4	7.44430942278648	-0.460186	0.0618172	1.05337e-12	0.000108309	0.00621077
rs8046545	Pancreas	ENSG00000178952.10	TUFM	-7.49430946154259	0.32572	0.0434623	1.15222e-12	0.000128358	4.09125e-07
rs4688760	Whole_Blood	ENSG00000186792.16	HYAL3	-7.25549280223461	-0.205458	0.0283175	1.24257e-12	0.00071319	0.747393
rs11496066	Muscle_Skeletal	ENSG00000228049.7	POLR2J2	-7.24507582838469	0.448891	0.0619581	1.2553e-12	0.000273261	0.0916126
rs12910825	Whole_Blood	ENSG00000184056.14	VPS33B	-7.21911385623419	-0.202214	0.028011	1.59007e-12	9.74827e-05	0.984586
rs10195252	Muscle_Skeletal	ENSG00000169507.9	SLC38A11	7.20779428283977	-0.347202	0.0481704	1.61758e-12	0.00029398	0.011674
rs4281707	Liver	ENSG00000103479.15	RBL2	-7.63044667694835	0.25106	0.0329024	1.6636e-12	2.86865e-05	0.00279357
rs1061810	Thyroid	ENSG00000246250.2	RP11-613D13.5	-7.23679157634273	-0.248482	0.0343359	1.72329e-12	0.000191371	0.0313105
rs2268382	Adipose_Visceral_Omentum	ENSG00000106484.14	MEST	-7.28565291625711	-0.223077	0.0306186	1.72595e-12	0.000120216	0.0306056
rs10406327	Adipose_Subcutaneous	ENSG00000124299.13	PEPD	-7.21761212712075	0.226388	0.0313661	1.92578e-12	0.000149813	0.998278
rs474513	Liver	ENSG00000146477.5	SLC22A3	7.57916062003729	-0.533952	0.0704501	2.2343e-12	4.60501e-05	0.0963661
rs1531583	Adipose_Subcutaneous	ENSG00000185619.18	PCGF3	-7.19315299167054	-0.616067	0.0856463	2.26659e-12	0.00019479	0.942191
rs61676547	Adipose_Visceral_Omentum	ENSG00000265055.1	AC145343.2	7.23636208040868	0.479179	0.0662183	2.38135e-12	9.35195e-05	0.000507587
rs3217860	Whole_Blood	ENSG00000118971.7	CCND2	-7.1494774081332	-0.134184	0.0187683	2.54218e-12	6.75216e-05	1
rs6518681	Adipose_Subcutaneous	ENSG00000227117.6	HORMAD2-AS1	7.17413269093544	0.539117	0.0751473	2.57202e-12	0.000312136	2.43329e-05
rs11642430	Colon_Sigmoid	ENSG00000169592.14	INO80E	-7.34155465798137	-0.287455	0.0391546	2.64089e-12	0.000176133	0.0899529
rs3217860	Whole_Blood	ENSG00000078237.6	TIGAR	-7.13514854577408	-0.195206	0.0273584	2.7986e-12	8.13415e-05	1
rs601945	Muscle_Skeletal	ENSG00000223534.1	HLA-DQB1-AS1	-7.10311383233297	-0.442256	0.0622623	3.2778e-12	0.000264787	0.553061
rs2727301	Adipose_Visceral_Omentum	ENSG00000198909.7	MAP3K3	7.17672244349086	-0.232539	0.0324018	3.50782e-12	0.00015614	6.29299e-10
rs3768321	Muscle_Skeletal	ENSG00000090621.13	PABPC4	-7.07627497610602	-0.218176	0.0308321	3.92312e-12	0.00022972	0.0407552
rs2727301	Thyroid	ENSG00000198909.7	MAP3K3	7.10483239388644	-0.180516	0.0254075	4.13269e-12	0.000272031	1.89241e-11
rs62492368	Thyroid	ENSG00000002726.20	AOC1	7.09323834553111	0.336253	0.0474048	4.46014e-12	0.000148152	0.990381
rs10096633	Whole_Blood	ENSG00000175445.14	LPL	7.06427819802926	-0.404794	0.0573015	4.49125e-12	9.75524e-05	0.0454421
rs11070332	Whole_Blood	ENSG00000103932.11	RPAP1	-7.05433269024333	-0.138758	0.0196699	4.79803e-12	0.000246692	0.484538
rs3768321	Thyroid	ENSG00000090621.13	PABPC4	-7.0815600807072	-0.226039	0.0319194	4.81572e-12	0.000255457	0.00178661
rs56337234	Thyroid	ENSG00000168936.10	TMEM129	7.07870975065932	-0.178374	0.0251986	4.90665e-12	0.000197986	0.0957939
rs11070332	Colon_Sigmoid	ENSG00000103932.11	RPAP1	-7.24038254396576	-0.29203	0.0403335	4.93226e-12	0.000164834	0.641972
rs1801212	Thyroid	ENSG00000109501.13	WFS1	7.06685529312518	0.212706	0.030099	5.3033e-12	9.959e-05	0.0132266
rs4148856	Colon_Sigmoid	ENSG00000111328.6	CDK2AP1	7.20848687029548	0.220347	0.0305677	5.99904e-12	0.000146946	5.60775e-09
rs34855406	Muscle_Skeletal	ENSG00000037042.8	TUBG2	-7.01005384602755	-0.220383	0.0314381	6.09777e-12	0.00031113	6.53023e-06
rs4148856	Colon_Transverse	ENSG00000150967.17	ABCB9	-7.16566699649914	-0.31492	0.0439485	6.10626e-12	0.000172885	0.789528
rs2268382	Adipose_Subcutaneous	ENSG00000270823.1	RP11-2E11.6	-7.039006190249	-0.243941	0.0346556	6.2665e-12	0.000175326	0.0406856
rs4736819	Muscle_Skeletal	ENSG00000029534.19	ANK1	6.9930612454327	0.102914	0.0147166	6.82469e-12	0.000243123	0.986539
rs1061810	Colon_Transverse	ENSG00000246250.2	RP11-613D13.5	-7.14508088738396	-0.33437	0.0467973	6.94048e-12	7.96669e-05	0.0096208
rs2767036	Pancreas	ENSG00000110435.11	PDHX	-7.19838855717288	0.42775	0.0594231	7.10877e-12	5.71882e-05	0.0928239
rs1531583	Muscle_Skeletal	ENSG00000185619.18	PCGF3	-6.98182539338807	-0.420457	0.0602217	7.35142e-12	0.000204384	0.965775
rs1061810	Pancreas	ENSG00000246250.2	RP11-613D13.5	-7.19239925495895	-0.468687	0.0651643	7.37202e-12	7.00266e-05	0.0893026
rs1260326	Adipose_Subcutaneous	ENSG00000115216.13	NRBP1	-7.01151168105561	-0.18718	0.0266961	7.49913e-12	0.000302736	0.984723
rs4148856	Colon_Sigmoid	ENSG00000130921.7	C12orf65	7.16826284359276	0.307493	0.0428964	7.67327e-12	0.000142616	0.00543553
rs4148856	Adipose_Subcutaneous	ENSG00000130921.7	C12orf65	6.9928469219582	0.244081	0.0349044	8.46866e-12	0.000310765	0.000505698
rs61676547	Adipose_Subcutaneous	ENSG00000265055.1	AC145343.2	6.99020291409956	0.436915	0.0625039	8.6156e-12	0.000147278	0.000194476
rs12719778	Muscle_Skeletal	ENSG00000160959.7	LRRC14	-6.95750293646294	0.193667	0.0278357	8.63217e-12	0.000255039	0.386616
rs1531583	Adipose_Visceral_Omentum	ENSG00000185619.18	PCGF3	-7.03351174848108	-0.669202	0.0951447	8.80571e-12	0.000123086	0.88224
rs60276348	Thyroid	ENSG00000224383.7	PRR29	6.97992795319185	0.256376	0.0367305	9.34875e-12	0.000338335	0.326088
rs11688682	Adipose_Subcutaneous	ENSG00000163083.5	INHBB	-6.9597427707319	0.244834	0.0351785	1.05001e-11	0.000143571
rs601945	Whole_Blood	ENSG00000179344.16	HLA-DQB1	-6.93354454524586	-0.321928	0.0464306	1.06401e-11	0.000219538	0.00282626
rs1316776	Muscle_Skeletal	ENSG00000132837.14	DMGDH	6.92188330221791	-0.290351	0.0419468	1.0912e-11	0.000165991	0.0444204
rs2280141	Thyroid	ENSG00000107679.14	PLEKHA1	-6.95476424879689	0.188308	0.0270761	1.10047e-11	0.000160335	0.306067
rs62007683	Whole_Blood	ENSG00000075413.17	MARK3	-6.92525463053965	0.141172	0.0203852	1.12333e-11	0.000159757	0.0564019
rs3768321	Adipose_Visceral_Omentum	ENSG00000090621.13	PABPC4	-6.98148230263336	-0.171496	0.0245644	1.22605e-11	0.000130618	0.00675823
rs3811978	Whole_Blood	ENSG00000152684.10	PELO	-6.90347450592731	-0.215429	0.0312058	1.29509e-11	0.000214317	0.5
rs1061810	Stomach	ENSG00000246250.2	RP11-613D13.5	-7.07033430917298	-0.312883	0.0442529	1.33232e-11	5.35292e-05	0.0868858
rs2052261	Whole_Blood	ENSG00000011523.13	CEP68	6.89586264419816	0.22109	0.0320612	1.361e-11	0.0001283	5.66086e-21
rs11642430	Pancreas	ENSG00000169592.14	INO80E	-7.09078839363064	-0.257474	0.036311	1.36222e-11	0.00014884	0.0595029
rs2052261	Pancreas	ENSG00000011523.13	CEP68	7.08061292643425	0.364573	0.0514889	1.44818e-11	5.92776e-05	5.43628e-13
rs3111316	Pancreas	ENSG00000105607.12	GCDH	-7.07324403827149	-0.280163	0.0396089	1.51374e-11	7.52372e-05	0.25331
rs10097617	Adipose_Visceral_Omentum	ENSG00000175305.17	CCNE2	6.94514013238317	-0.337185	0.0485498	1.54325e-11	0.000111546	0.0810959
rs3111316	Whole_Blood	ENSG00000179115.10	FARSA	-6.86676019110891	-0.101968	0.0148495	1.64475e-11	0.00013123	0.0453971
rs1708302	Adipose_Subcutaneous	ENSG00000153814.11	JAZF1	6.88662552738103	-0.173233	0.025155	1.68347e-11	0.000140819	0.13974
rs11642430	Colon_Transverse	ENSG00000149927.17	DOC2A	-6.99945801739129	-0.156814	0.0224037	1.70494e-11	0.000177476	0.058058
rs3111316	Whole_Blood	ENSG00000105612.8	DNASE2	-6.84465960361847	-0.218145	0.0318708	1.89831e-11	0.000113063	0.0745913
rs11496066	Thyroid	ENSG00000228049.7	POLR2J2	-6.86729537880561	0.479421	0.0698122	1.93284e-11	0.000316796	0.0645049
rs340874	Liver	ENSG00000274895.1	RP11-478J18.2	7.18731147113842	0.373896	0.0520216	2.06214e-11	3.65714e-05	1
rs7124681	Adipose_Subcutaneous	ENSG00000165916.8	PSMC3	6.8547854890125	0.150485	0.0219532	2.06511e-11	0.000809597	0.103823
rs3111316	Adipose_Subcutaneous	ENSG00000179115.10	FARSA	-6.84955910695214	-0.119305	0.0174179	2.13539e-11	0.000171843	0.0160062
rs62492368	Liver	ENSG00000002726.20	AOC1	-7.17056718057621	-0.62957	0.0877991	2.26469e-11	2.57338e-05	0.560698
rs11642430	Whole_Blood	ENSG00000169592.14	INO80E	-6.80688962541106	-0.162428	0.0238623	2.42327e-11	0.000281731	0.0317893
rs4688760	Adipose_Subcutaneous	ENSG00000164068.15	RNF123	6.81165227933251	0.194831	0.0286026	2.72041e-11	0.000810692	0.991586
rs2972144	Adipose_Visceral_Omentum	ENSG00000169047.5	IRS1	-6.8531402249541	-0.21758	0.031749	2.75212e-11	9.94661e-05	0.0249138
rs2727301	Pancreas	ENSG00000108592.16	FTSJ3	6.97304900229937	-0.475933	0.0682533	2.75577e-11	0.000126836	1.50187e-05
rs12719778	Thyroid	ENSG00000167702.11	KIFC2	6.7976673119043	-0.172154	0.0253255	3.01417e-11	0.000262191	0.000180353
rs2307111	Thyroid	ENSG00000152359.14	POC5	6.77236506644717	-0.277461	0.0409696	3.53921e-11	0.000230615	5.4573e-05
rs2233632	Muscle_Skeletal	ENSG00000065060.16	UHRF1BP1	-6.73801920382914	-0.197644	0.0293326	3.60122e-11	0.000271938	0.499354
rs825452	Adipose_Visceral_Omentum	ENSG00000119242.8	CCDC92	-6.80316290143986	-0.208237	0.0306089	3.75914e-11	9.71667e-05	0.1192
rs56348580	Adipose_Subcutaneous	ENSG00000157895.11	C12orf43	6.7450113606472	-0.243677	0.036127	4.15314e-11	0.000270943	0.222989
rs1260326	Thyroid	ENSG00000115226.9	FNDC4	6.74704588102632	0.212944	0.0315611	4.15417e-11	0.000366417	0.040642
rs8046545	Pancreas	ENSG00000197165.10	SULT1A2	-6.87915922062809	0.453942	0.065988	4.80739e-11	8.91787e-05	3.9048e-05
rs3751837	Thyroid	ENSG00000167984.17	NLRC3	-6.72177628277275	-0.240982	0.035851	4.87214e-11	0.000168776	0.0185048
rs11070332	Pancreas	ENSG00000103932.11	RPAP1	-6.86278649135042	-0.308441	0.0449439	5.29464e-11	0.00014141	0.96484
rs12920022	Adipose_Visceral_Omentum	ENSG00000167526.13	RPL13	-6.74743049437572	-0.176232	0.0261184	5.31156e-11	0.000109617
rs12920022	Whole_Blood	ENSG00000167526.13	RPL13	-6.68130734017819	-0.0942052	0.0140998	5.41376e-11	0.000127364
rs11699802	Adipose_Subcutaneous	ENSG00000231742.5	LINC01273	6.7026433547923	-0.325286	0.048531	5.42557e-11	0.000138811	0.0053495
rs13737	Stomach	ENSG00000169371.13	SNUPN	6.81915123584778	-0.283827	0.041622	6.02172e-11	0.000117549	0.16194
rs2268078	Thyroid	ENSG00000101460.12	MAP1LC3A	6.68571228708839	0.186258	0.0278591	6.11184e-11	0.000538521
rs6780171	Thyroid	ENSG00000073792.15	IGF2BP2	6.68509806509556	0.249207	0.037278	6.13543e-11	0.00021225	0.00193976
rs1493694	Pancreas	ENSG00000134250.19	NOTCH2	-6.83738128223646	-0.385792	0.0564239	6.14845e-11	0.000128313	0.000626366
rs7115753	Muscle_Skeletal	ENSG00000205106.4	DKFZp779M0652	-6.65267636192891	0.226067	0.0339813	6.21175e-11	0.000253221	0.000100435
rs13737	Thyroid	ENSG00000169371.13	SNUPN	6.68128170803546	-0.191456	0.0286555	6.28402e-11	0.000434482	2.61469e-05
rs12719778	Muscle_Skeletal	ENSG00000161016.17	RPL8	6.64911343235768	-0.124924	0.018788	6.35396e-11	0.000317264	2.30076e-05
rs80147536	Thyroid	ENSG00000279873.2	LINC01126	6.67200182143769	-0.325538	0.0487917	6.66024e-11	0.000252192	0.197266
rs7178762	Adipose_Visceral_Omentum	ENSG00000103657.13	HERC1	-6.7077712932642	0.196573	0.0293052	6.78405e-11	0.000177775	0.166319
rs576123	Whole_Blood	ENSG00000175164.13	ABO	6.64104430011266	-0.350674	0.052804	6.98704e-11	8.5485e-05
rs4776970	Muscle_Skeletal	ENSG00000188779.10	SKOR1	-6.6279165585535	0.203438	0.0306941	7.26836e-11	0.000181406	0.999884
rs9430095	Colon_Transverse	ENSG00000261000.1	RP11-534L20.5	-6.75529287897827	-0.355633	0.0526452	7.47799e-11	8.59466e-05	0.35833
rs8046545	Whole_Blood	ENSG00000168488.18	ATXN2L	6.6226544247869	-0.100858	0.0152292	7.8472e-11	0.000197494	0.219107
rs2238689	Adipose_Subcutaneous	ENSG00000125743.10	SNRPD2	-6.64084865100438	-0.112489	0.016939	7.99256e-11	0.000130444
rs11070332	Stomach	ENSG00000103932.11	RPAP1	-6.77020722869451	-0.250703	0.0370303	8.04526e-11	0.000100056	0.780459
rs12642790	Thyroid	ENSG00000249242.7	TMEM150C	6.64126966968046	-0.214672	0.032324	8.07079e-11	0.000195611
rs2052261	Stomach	ENSG00000011523.13	CEP68	6.76703652441842	0.245293	0.0362481	8.19728e-11	4.89786e-05	1.11992e-09
rs11642430	Small_Intestine_Terminal_Ileum	ENSG00000169592.14	INO80E	-7.04857251148576	-0.435976	0.0618531	8.64533e-11	8.3521e-05	0.106903
rs11642430	Whole_Blood	ENSG00000250616.2	RP11-455F5.3	6.60504606916683	0.15869	0.0240255	8.7677e-11	0.000307893	0.0794308
rs116913033	Liver	ENSG00000058404.19	CAMK2B	-6.92181364469413	0.48449	0.0699946	8.99143e-11	4.51566e-05	0.335986
rs4925109	Whole_Blood	ENSG00000072310.16	SREBF1	6.60093900478549	-0.231829	0.0351205	8.99717e-11	0.000183549	0.976211
rs340874	Pancreas	ENSG00000230461.8	PROX1-AS1	6.76384031618273	0.480687	0.0710672	9.45885e-11	7.5854e-05	0.999985
rs10195252	Thyroid	ENSG00000169507.9	SLC38A11	6.61561786802486	-0.321887	0.0486556	9.46925e-11	0.000319608	0.224653
rs96844	Pituitary	ENSG00000155542.11	SETD9	6.84441443902807	-0.499565	0.0729888	9.49878e-11	5.53063e-05	0.214336
rs2280141	Adipose_Visceral_Omentum	ENSG00000107679.14	PLEKHA1	-6.64735460729215	0.159993	0.0240687	9.82794e-11	9.1392e-05	0.614159
rs6600191	Muscle_Skeletal	ENSG00000242173.8	ARHGDIG	6.57908677511366	-0.347073	0.052754	9.89375e-11	0.000143177	0.0719763
rs4688760	Pituitary	ENSG00000186792.16	HYAL3	-6.83167324071566	-0.440141	0.0644265	1.02063e-10	0.000286182	0.852203
rs10097617	Adipose_Subcutaneous	ENSG00000156170.12	NDUFAF6	6.59925067401448	-0.235411	0.0356723	1.03571e-10	0.000159919	0.0609721
rs4148856	Muscle_Skeletal	ENSG00000183955.12	KMT5A	-6.56726100410052	-0.196935	0.0299874	1.06579e-10	0.000286896	0.00887596
rs28505901	Thyroid	ENSG00000148384.12	INPP5E	-6.59165637038818	0.211701	0.0321165	1.09888e-10	0.000108049	0.0777345
rs5758223	Muscle_Skeletal	ENSG00000231993.1	EP300-AS1	6.5577464214114	0.364899	0.055644	1.13144e-10	0.000581683	0.0281881
rs1580278	Small_Intestine_Terminal_Ileum	ENSG00000164039.14	BDH2	6.99659777932933	-0.291564	0.0416722	1.13471e-10	5.73904e-05	0.413641
rs3115960	Adipose_Subcutaneous	ENSG00000153774.8	CFDP1	-6.5689612778706	0.148241	0.0225669	1.24978e-10	0.000185423	5.95858e-08
rs12719778	Adipose_Visceral_Omentum	ENSG00000161016.17	RPL8	6.60077945523262	-0.122845	0.0186107	1.30557e-10	0.000175576	0.442468
rs10937721	Adipose_Subcutaneous	ENSG00000109501.13	WFS1	6.55955584808797	0.208262	0.0317495	1.32468e-10	7.45026e-05	0.00695101
rs59944054	Whole_Blood	ENSG00000125510.15	OPRL1	6.53838780345194	0.13648	0.0208737	1.33132e-10	0.000145265	0.0813118
rs13737	Small_Intestine_Terminal_Ileum	ENSG00000260274.1	RP11-817O13.8	6.96348325009722	-0.422141	0.0606221	1.34877e-10	8.17649e-05	8.29276e-08
rs11496066	Muscle_Skeletal	ENSG00000267368.1	UPK3BL	-6.52928783987337	0.388881	0.0595595	1.35237e-10	0.000291058	0.000220353
rs2307111	Thyroid	ENSG00000189045.13	ANKDD1B	-6.55265895206851	0.237826	0.0362946	1.39874e-10	0.000198109	0.000152666
rs1316776	Whole_Blood	ENSG00000152409.8	JMY	6.52687463051291	-0.103281	0.0158239	1.43041e-10	0.000127277	0.00782481
rs3774723	Whole_Blood	ENSG00000280620.1	SCAANT1	6.51677646180152	-0.38622	0.0592656	1.52324e-10	0.000122692	1.24937e-05
rs7124681	Colon_Sigmoid	ENSG00000172247.3	C1QTNF4	-6.66023838839155	-0.341695	0.0513037	1.59014e-10	0.000392413	0.0232603
rs3115960	Muscle_Skeletal	ENSG00000153774.8	CFDP1	-6.50324379378914	0.155841	0.0239635	1.59126e-10	0.000181404	0.00287103
rs1708302	Adipose_Visceral_Omentum	ENSG00000153814.11	JAZF1	6.56507431877437	-0.179229	0.0273003	1.62146e-10	7.52573e-05	0.257043
rs4688760	Colon_Sigmoid	ENSG00000186792.16	HYAL3	-6.65226940384522	-0.376795	0.0566416	1.66562e-10	0.00047027	0.568813
rs11642430	Adipose_Subcutaneous	ENSG00000149922.10	TBX6	6.51743348952245	0.247849	0.0380286	1.71772e-10	0.000316389	0.0787938
rs6518681	Thyroid	ENSG00000100330.15	MTMR3	-6.51142305087502	-0.358341	0.0550326	1.80301e-10	0.000356795	5.73872e-07
rs3111316	Adipose_Visceral_Omentum	ENSG00000105607.12	GCDH	-6.54503044935158	-0.126067	0.0192615	1.83047e-10	0.000100642	0.454019
rs1783541	Adipose_Subcutaneous	ENSG00000168056.15	LTBP3	6.50301171284341	0.148849	0.0228892	1.87694e-10	0.000316613	0.12065
rs4148856	Muscle_Skeletal	ENSG00000150967.17	ABCB9	-6.47027938772761	-0.257973	0.0398704	1.95353e-10	0.000348359	0.31417
rs8046545	Pancreas	ENSG00000196502.11	SULT1A1	6.63760664389875	-0.378302	0.0569937	1.96727e-10	9.00111e-05	0.0890941
rs7124681	Adipose_Subcutaneous	ENSG00000165915.13	SLC39A13	6.4953292898051	0.139096	0.0214148	1.96758e-10	0.000774084	0.138158
rs4281707	Colon_Sigmoid	ENSG00000166971.16	AKTIP	-6.60604748318623	0.213312	0.0322904	2.17805e-10	6.11466e-05	0.0675156
rs825452	Adipose_Visceral_Omentum	ENSG00000179195.15	ZNF664	-6.51547502687422	-0.166022	0.0254812	2.18768e-10	9.21356e-05	0.305569
rs4148856	Whole_Blood	ENSG00000111328.6	CDK2AP1	6.45548177022852	0.268092	0.0415294	2.22729e-10	0.000231431	2.47173e-08
rs601945	Adipose_Visceral_Omentum	ENSG00000179344.16	HLA-DQB1	-6.50921470424468	-0.49682	0.0763256	2.27168e-10	0.000177661	0.111158
rs11496066	Whole_Blood	ENSG00000228049.7	POLR2J2	-6.45087300579075	0.387745	0.0601074	2.29156e-10	0.000230672	0.002296
rs11496066	Adipose_Subcutaneous	ENSG00000228049.7	POLR2J2	-6.46877061728633	0.439228	0.0678998	2.31519e-10	0.000256518	0.114746
rs8107974	Muscle_Skeletal	ENSG00000129933.20	MAU2	-6.44005505815304	-0.226659	0.0351953	2.35593e-10	0.000258012	0.0437878
rs2727301	Pituitary	ENSG00000198909.7	MAP3K3	6.66047240010002	-0.289472	0.0434612	2.65971e-10	7.39273e-05	0.00117489
rs76895963	Adipose_Subcutaneous	ENSG00000118971.7	CCND2	6.4451378861964	-0.878583	0.136317	2.6746e-10	0.000102941
rs825452	Adipose_Subcutaneous	ENSG00000179195.15	ZNF664	-6.44113887650738	-0.148678	0.0230825	2.74061e-10	0.000177974	0.0592406
rs13737	Thyroid	ENSG00000173548.8	SNX33	6.43694827901587	-0.187921	0.0291941	2.84263e-10	0.00044789	0.142409
rs61676547	Adipose_Subcutaneous	ENSG00000277476.1	RP11-147L13.13	6.43287108375676	0.241743	0.0375794	2.88216e-10	0.000163638	0.377207
rs11070332	Adipose_Subcutaneous	ENSG00000137877.9	SPTBN5	6.42701506945249	0.301207	0.0468658	2.98673e-10	0.000342224	0.35856
rs3768321	Whole_Blood	ENSG00000090621.13	PABPC4	-6.40188709297434	-0.11405	0.0178151	3.09741e-10	0.00016082	0.422433
rs1562396	Adipose_Subcutaneous	ENSG00000266265.2	KLF14	-6.417337287331	-0.200274	0.0312083	3.16774e-10	0.000136691	0.213287
rs11926707	Muscle_Skeletal	ENSG00000160796.16	NBEAL2	-6.38818625605586	-0.190764	0.0298619	3.24352e-10	0.000434964	0.999715
rs3751837	Adipose_Subcutaneous	ENSG00000167984.17	NLRC3	-6.41181503184822	-0.257369	0.0401398	3.2758e-10	0.00013525	0.0677536
rs4688760	Thyroid	ENSG00000164078.12	MST1R	6.40637395655276	0.22953	0.0358283	3.42264e-10	0.0010444	0.997017
rs11496066	Muscle_Skeletal	ENSG00000205238.9	SPDYE2	-6.35924120387657	0.374682	0.0589192	3.87343e-10	0.000254006	0.0474074
rs2727301	Stomach	ENSG00000198231.12	DDX42	-6.48836073340763	0.248741	0.0383365	4.15073e-10	0.000100446	5.42246e-05
rs2052261	Colon_Transverse	ENSG00000011523.13	CEP68	6.46370220438287	0.133023	0.0205801	4.16545e-10	6.63234e-05	3.56586e-14
rs2872246	Pituitary	ENSG00000223882.1	ABCC5-AS1	-6.57509645646831	0.509369	0.0774695	4.26516e-10	5.5989e-05
rs1005752	Pituitary	ENSG00000140382.14	HMG20A	6.57246408796517	0.367058	0.0558478	4.32747e-10	0.000119065	0.00129893
rs8046545	Adipose_Visceral_Omentum	ENSG00000178188.14	SH2B1	6.39670664204337	-0.132246	0.020674	4.45024e-10	0.000165037	0.0676382
rs2581787	Stomach	ENSG00000163933.9	RFT1	-6.47405038266412	-0.280169	0.0432757	4.5056e-10	0.000123084	0.0291498
rs4977213	Thyroid	ENSG00000261236.7	BOP1	-6.35426084039129	0.162312	0.0255438	4.68919e-10	0.000213217	0.0569507
rs4688760	Colon_Sigmoid	ENSG00000004534.14	RBM6	-6.46587111711953	-0.282149	0.0436367	4.87508e-10	0.000443807	0.924589
rs3768321	Colon_Transverse	ENSG00000090621.13	PABPC4	-6.43255457269854	-0.242761	0.0377394	4.98837e-10	0.000100474	0.854415
rs10097617	Colon_Sigmoid	ENSG00000156170.12	NDUFAF6	6.45661681753072	-0.287576	0.0445398	5.13929e-10	8.58847e-05	0.207447
rs1061810	Adipose_Visceral_Omentum	ENSG00000246250.2	RP11-613D13.5	-6.36800459326839	-0.304871	0.0478755	5.27543e-10	9.38954e-05	0.0526624
rs7978610	Pancreas	ENSG00000119242.8	CCDC92	6.44846618942555	-0.343315	0.0532397	5.79334e-10	6.06223e-05	0.0234681
rs11070332	Adipose_Visceral_Omentum	ENSG00000137877.9	SPTBN5	6.34967867824533	0.34961	0.0550594	5.87883e-10	0.000187486	0.330482
rs2581787	Thyroid	ENSG00000163935.13	SFMBT1	6.31374328905625	0.209295	0.0331491	5.98117e-10	0.000364403	0.0499005
rs2280141	Adipose_Subcutaneous	ENSG00000107679.14	PLEKHA1	-6.30003094701081	0.162892	0.0258558	6.42706e-10	0.000147281	0.140108
rs1260326	Whole_Blood	ENSG00000115216.13	NRBP1	-6.28162068239202	-0.114348	0.0182036	6.43841e-10	0.000228943	0.99492
rs3115960	Whole_Blood	ENSG00000153774.8	CFDP1	-6.2770767047225	0.150843	0.0240307	6.61739e-10	0.000168366	3.62227e-05
rs11496066	Adipose_Visceral_Omentum	ENSG00000228049.7	POLR2J2	-6.31567073564954	0.505688	0.0800688	7.18282e-10	0.000180609	0.0822567
rs1708302	Muscle_Skeletal	ENSG00000234336.6	JAZF1-AS1	6.25635472269239	-0.262229	0.041914	7.23938e-10	0.000151816	0.128157
rs61676547	Thyroid	ENSG00000278740.1	RP11-147L13.14	6.27926815750583	0.31369	0.0499565	7.34992e-10	0.00017345	0.0019461
rs8046545	Whole_Blood	ENSG00000176476.8	SGF29	6.25324485343651	-0.15992	0.025574	7.63881e-10	0.000183106	0.0195717
rs8046545	Muscle_Skeletal	ENSG00000184110.14	EIF3C	-6.24088485666076	0.236601	0.0379115	7.94728e-10	0.000178645	0.412303
rs11070332	Adipose_Subcutaneous	ENSG00000243708.10	PLA2G4B	6.24746083532099	0.150096	0.0240251	8.79464e-10	0.000326333	0.112794
rs2280141	Colon_Sigmoid	ENSG00000254636.1	ARMS2	-6.35885360074329	0.450537	0.070852	8.94679e-10	6.4651e-05	0.00686177
rs1783541	Thyroid	ENSG00000260233.3	SSSCA1-AS1	6.24508723258694	0.217592	0.0348422	9.00789e-10	0.000397496	0.00609294
rs4776970	Adipose_Visceral_Omentum	ENSG00000188779.10	SKOR1	-6.27570560086306	0.222865	0.0355124	9.07981e-10	0.000108348	0.992988
rs5758223	Adipose_Visceral_Omentum	ENSG00000235513.1	RP4-756G23.5	6.27331325591048	0.260645	0.0415483	9.20775e-10	0.0003207	0.0109447
rs601945	Muscle_Skeletal	ENSG00000196126.11	HLA-DRB1	-6.21021857483461	-0.250782	0.0403821	9.55624e-10	0.00024126	0.0295449
rs1531583	Thyroid	ENSG00000185619.18	PCGF3	-6.23355149452572	-0.446382	0.0716096	9.64604e-10	0.000227677	0.865299
rs3111316	Colon_Sigmoid	ENSG00000105607.12	GCDH	-6.338971687319	-0.208082	0.0328259	1.00074e-09	8.04932e-05	0.507469
rs4688760	Colon_Transverse	ENSG00000186792.16	HYAL3	-6.3101952473471	-0.31855	0.0504818	1.00673e-09	0.000491464	0.942275
rs2280141	Muscle_Skeletal	ENSG00000107679.14	PLEKHA1	-6.1938527850771	0.118496	0.0191312	1.0541e-09	0.000149606	0.666954
rs12719778	Adipose_Subcutaneous	ENSG00000167702.11	KIFC2	6.21420068846859	-0.151426	0.0243678	1.07131e-09	0.000215377	0.236285
rs11642430	Stomach	ENSG00000169592.14	INO80E	-6.32032234162449	-0.302679	0.0478899	1.07908e-09	9.56973e-05	0.114876
rs11926707	Adipose_Visceral_Omentum	ENSG00000160801.13	PTH1R	-6.24595730339798	-0.197898	0.0316841	1.08022e-09	0.000286128	0.999488
rs11496066	Whole_Blood	ENSG00000170667.14	RASA4B	6.18457610460112	-0.308561	0.049892	1.15224e-09	0.00020386	0.0202824
rs12640250	Pancreas	ENSG00000163257.10	DCAF16	-6.31577495358167	-0.265055	0.0419672	1.22054e-09	7.66752e-05	0.3933
rs8046545	Pituitary	ENSG00000196502.11	SULT1A1	6.37326635202714	-0.446347	0.0700343	1.28362e-09	8.46115e-05	0.0853976
rs116913033	Thyroid	ENSG00000058404.19	CAMK2B	-6.17035165104941	0.21925	0.0355328	1.40092e-09	0.000237723	0.265786
rs2581787	Whole_Blood	ENSG00000163933.9	RFT1	-6.15016993720384	-0.122009	0.0198383	1.41374e-09	0.000209773	0.0430481
rs3751837	Stomach	ENSG00000103351.12	CLUAP1	6.26797155477069	0.255332	0.040736	1.44801e-09	6.09552e-05	0.790496
rs8046545	Muscle_Skeletal	ENSG00000196502.11	SULT1A1	6.13581284160241	-0.217712	0.0354822	1.48998e-09	0.000216373	0.00869964
rs56348580	Adipose_Visceral_Omentum	ENSG00000157895.11	C12orf43	6.18668797946611	-0.226352	0.0365869	1.52398e-09	0.000153921	0.519021
rs35895680	Muscle_Skeletal	ENSG00000159199.13	ATP5G1	-6.12369891805851	0.0846433	0.0138223	1.60103e-09	0.000283838
rs601945	Whole_Blood	ENSG00000196735.11	HLA-DQA1	-6.12118878923823	-0.182613	0.0298329	1.6783e-09	0.000235171	0.00861005
rs4148856	Stomach	ENSG00000111328.6	CDK2AP1	6.24151858209331	0.235623	0.0377508	1.6789e-09	9.40166e-05	2.42148e-09
rs1377807	Muscle_Skeletal	ENSG00000074755.14	ZZEF1	6.10932760822338	0.12747	0.0208649	1.74329e-09	0.000114047	0.0544918
rs11070332	Adipose_Subcutaneous	ENSG00000243789.10	JMJD7	6.12729831799247	0.226341	0.0369398	1.78674e-09	0.000308829	0.157485
rs12640250	Whole_Blood	ENSG00000163257.10	DCAF16	-6.11018175815975	-0.101271	0.0165741	1.79097e-09	0.000168169	0.431779
rs58432198	Muscle_Skeletal	ENSG00000123080.10	CDKN2C	-6.10335565379248	0.235645	0.038609	1.80598e-09	0.000605749
rs2268382	Thyroid	ENSG00000106484.14	MEST	-6.12444533716778	-0.240958	0.0393437	1.83353e-09	0.000181592	0.207523
rs11642430	Adipose_Visceral_Omentum	ENSG00000149922.10	TBX6	6.15331652456038	0.21302	0.0346188	1.84777e-09	0.000205306	0.0892777
rs34855406	Muscle_Skeletal	ENSG00000141699.10	FAM134C	6.09088753712767	0.188754	0.0309895	1.94402e-09	0.000283915	0.0153351
rs59944054	Thyroid	ENSG00000196132.11	MYT1	6.11337249786849	0.233752	0.0382362	1.95602e-09	0.000268632	0.255912
rs4810426	Thyroid	ENSG00000132823.10	OSER1	6.11334177179241	0.278888	0.0456195	1.95637e-09	0.000155369	0.00813011
rs59944054	Stomach	ENSG00000125510.15	OPRL1	-6.20914870176572	-0.359713	0.0579327	2.0109e-09	6.79074e-05	0.0805797
rs2233632	Whole_Blood	ENSG00000065060.16	UHRF1BP1	-6.08449728398312	-0.209614	0.0344505	2.08338e-09	0.000193193	0.434231
rs2767036	Colon_Transverse	ENSG00000110435.11	PDHX	-6.17711282986843	0.175983	0.0284895	2.13694e-09	7.76393e-05	0.0140019
rs1531583	Whole_Blood	ENSG00000185619.18	PCGF3	-6.07776713274887	-0.335587	0.0552155	2.16741e-09	0.000163247	0.0712435
rs13737	Adipose_Subcutaneous	ENSG00000140398.13	NEIL1	6.08847713793078	-0.175593	0.0288402	2.24117e-09	0.000370585	0.00628926
rs348330	Thyroid	ENSG00000069248.11	NUP133	6.06967642822111	-0.136723	0.0225255	2.52231e-09	0.000186442	1
rs2307111	Pancreas	ENSG00000152359.14	POC5	6.18156310498175	-0.423868	0.0685697	2.56573e-09	7.80128e-05	0.0443865
rs62007683	Stomach	ENSG00000075413.17	MARK3	6.15584135960713	-0.210139	0.0341366	2.70283e-09	6.1876e-05	0.00089978
rs35352848	Thyroid	ENSG00000182247.9	UBE2E2	-6.0571792203981	0.223879	0.036961	2.71182e-09	0.000287387	0.23452
rs3774723	Whole_Blood	ENSG00000243410.1	PSMD6-AS1	6.03765800867455	-0.331767	0.0549496	2.74126e-09	0.000117509	0.151486
rs11699802	Muscle_Skeletal	ENSG00000231742.5	LINC01273	6.02913315172473	-0.253855	0.0421048	2.79464e-09	0.000166617	0.00367443
rs112915006	Thyroid	ENSG00000073146.15	MOV10L1	6.04923560748903	0.658408	0.108842	2.83944e-09	0.000141575	0.00492418
rs4925109	Pituitary	ENSG00000197815.4	RP1-253P7.4	6.22197696385826	-0.269513	0.0433162	2.89126e-09	0.000102074	0.807041
rs2249105	Liver	ENSG00000011523.13	CEP68	-6.27214015092155	0.362492	0.0577939	2.91009e-09	3.1332e-05	0.319916
rs4776970	Thyroid	ENSG00000103599.19	IQCH	-6.0447067499436	0.173756	0.0287452	2.9148e-09	0.000238591	0.361623
rs7240767	Thyroid	ENSG00000101680.14	LAMA1	-6.03536122895796	-0.266861	0.0442163	3.07654e-09	0.000143032	0.011803
rs1783541	Adipose_Visceral_Omentum	ENSG00000245532.7	NEAT1	6.06314387080365	0.321731	0.0530634	3.09713e-09	0.000192325	0.103892
rs11496066	Stomach	ENSG00000228049.7	POLR2J2	-6.13102946283368	0.561714	0.0916182	3.09977e-09	0.00010104	0.0235537
rs113414093	Pancreas	ENSG00000115596.3	WNT6	6.14248033081574	0.884754	0.144039	3.17888e-09	8.15525e-05
rs3115960	Liver	ENSG00000261783.1	RP11-252K23.2	-6.24750562706245	0.590945	0.0945889	3.30765e-09	4.60017e-05	0.000102717
rs8046545	Colon_Transverse	ENSG00000196993.8	NPIPB9	6.09722293646677	-0.377879	0.0619756	3.33877e-09	0.000110563	0.0189162
rs13737	Colon_Transverse	ENSG00000169371.13	SNUPN	6.09268675626263	-0.244802	0.0401797	3.42401e-09	0.000183921	0.0994394
rs59944054	Thyroid	ENSG00000171700.13	RGS19	-6.01620553516349	-0.188637	0.0313549	3.43593e-09	0.000235317	0.00177387
rs8046545	Colon_Sigmoid	ENSG00000196502.11	SULT1A1	6.11465523074316	-0.333459	0.0545344	3.48254e-09	0.000107668	0.0615818
rs8046545	Small_Intestine_Terminal_Ileum	ENSG00000251417.2	RP11-1348G14.4	6.31830835212528	-0.587318	0.092955	3.62619e-09	6.65416e-05	0.149007
rs12640250	Stomach	ENSG00000163257.10	DCAF16	-6.09856490058285	-0.302726	0.049639	3.70627e-09	7.12668e-05	0.475662
rs4688760	Small_Intestine_Terminal_Ileum	ENSG00000004534.14	RBM6	-6.31073312505522	-0.4559	0.072242	3.76564e-09	0.00019133	0.952871
rs2581787	Thyroid	ENSG00000055955.15	ITIH4	5.99966671322183	0.205795	0.0343011	3.77895e-09	0.000372021	0.220663
rs28505901	Whole_Blood	ENSG00000148396.18	SEC16A	-5.97511671831809	0.151142	0.0252953	3.94351e-09	6.84476e-05	0.151812
rs2727301	Muscle_Skeletal	ENSG00000198231.12	DDX42	-5.95774420956691	0.118645	0.0199144	4.235e-09	0.000305203	0.0131139
rs11709077	Muscle_Skeletal	ENSG00000157152.16	SYN2	5.94170899995422	-0.350052	0.0589144	4.6468e-09	0.000185543	0.822981
rs601945	Muscle_Skeletal	ENSG00000204525.16	HLA-C	-5.93981618767863	-0.32872	0.0553418	4.69791e-09	0.000388948
rs601945	Thyroid	ENSG00000179344.16	HLA-DQB1	-5.95841988407688	-0.397842	0.0667697	4.78665e-09	0.000287008	0.0179593
rs738408	Adipose_Subcutaneous	ENSG00000100347.14	SAMM50	5.95219637083556	0.187788	0.0315494	4.91919e-09	8.09748e-05	0.186789
rs12640250	Colon_Sigmoid	ENSG00000163257.10	DCAF16	-6.04418600083347	-0.250744	0.0414852	5.1192e-09	0.000100234	0.272514
rs601945	Muscle_Skeletal	ENSG00000241106.6	HLA-DOB	5.92247421695038	0.379722	0.0641154	5.19247e-09	0.000255904	0.632901
rs8046545	Pituitary	ENSG00000196296.13	ATP2A1	-6.10061338517328	0.429502	0.0704032	5.49715e-09	9.53222e-05	0.304472
rs3751837	Colon_Transverse	ENSG00000167984.17	NLRC3	-6.00456910568691	-0.207637	0.0345798	5.57222e-09	6.45843e-05	0.939203
rs2972144	Adipose_Subcutaneous	ENSG00000272622.1	RP11-395N3.2	-5.92509649047739	-0.229059	0.0386591	5.74157e-09	0.000166248
rs12719778	Adipose_Subcutaneous	ENSG00000161016.17	RPL8	5.92126292886809	-0.109315	0.0184614	5.86823e-09	0.0002676	1.98454e-05
rs8046545	Colon_Sigmoid	ENSG00000196993.8	NPIPB9	6.01378611357962	-0.457792	0.0761237	6.03882e-09	9.18468e-05	0.0029764
rs11642430	Thyroid	ENSG00000169203.16	NPIPB12	5.91498190211502	0.275067	0.0465035	6.13082e-09	0.000350127
rs1783541	Muscle_Skeletal	ENSG00000245532.7	NEAT1	5.88742874647325	0.196732	0.0334156	6.3517e-09	0.000300017	0.1997
rs601945	Adipose_Subcutaneous	ENSG00000196126.11	HLA-DRB1	-5.90251953947023	-0.272374	0.0461454	6.52784e-09	0.000262109	0.0113326
rs7222481	Whole_Blood	ENSG00000109047.7	RCVRN	-5.87874533434175	-0.171649	0.0291982	6.86346e-09	7.42581e-05	0.0190137
rs1316776	Colon_Transverse	ENSG00000145692.14	BHMT	5.96612646895917	-0.326019	0.054645	6.87996e-09	8.02119e-05	0.00437178
rs1580278	Whole_Blood	ENSG00000164039.14	BDH2	5.86227622439368	-0.1731	0.0295278	7.53948e-09	0.000214061	0.518572
rs59944054	Pancreas	ENSG00000171700.13	RGS19	-5.97841540807666	-0.249978	0.0418134	7.73502e-09	7.76105e-05	0.00199735
rs7124681	Liver	ENSG00000165916.8	PSMC3	6.08189245825447	0.205407	0.0337736	7.76395e-09	0.000165478	0.175485
rs60276348	Whole_Blood	ENSG00000178607.15	ERN1	-5.85301187904855	-0.152027	0.0259741	7.94784e-09	0.000228453	0.338949
rs13737	Stomach	ENSG00000260274.1	RP11-817O13.8	5.95510871568797	-0.330691	0.0555306	8.09759e-09	0.000108305	0.146324
rs1783541	Muscle_Skeletal	ENSG00000168056.15	LTBP3	5.8416882678844	0.181281	0.0310323	8.24997e-09	0.00034529	0.00445337
rs35895680	Whole_Blood	ENSG00000159202.17	UBE2Z	5.84063774379584	-0.16233	0.0277932	8.52705e-09	0.000196034
rs115505614	Whole_Blood	ENSG00000145730.20	PAM	5.83789812210215	0.535708	0.0917638	8.66074e-09	0.000309038	0.344276
rs11496066	Thyroid	ENSG00000161048.11	NAPEPLD	-5.8492755555364	0.238627	0.0407961	8.88957e-09	0.000286859	9.04917e-05
rs4925109	Thyroid	ENSG00000171962.17	DRC3	-5.84692489191069	0.172423	0.0294894	9.00796e-09	0.000297852	0.915072
rs2767036	Pituitary	ENSG00000149089.12	APIP	6.00551205964663	-0.53995	0.089909	9.04398e-09	5.6966e-05	0.0693689
rs862320	Pancreas	ENSG00000157322.17	CLEC18A	5.94677068027423	-0.449687	0.0756187	9.16448e-09	0.000150638	0.0812127
rs1260326	Colon_Transverse	ENSG00000115216.13	NRBP1	-5.91172169751813	-0.151354	0.0256024	9.25587e-09	0.00016874	0.987785
rs576123	Stomach	ENSG00000175164.13	ABO	-5.92393090845097	0.268561	0.0453349	9.57981e-09	3.3928e-05
rs862320	Adipose_Subcutaneous	ENSG00000157322.17	CLEC18A	5.83163148923924	-0.342058	0.0586557	9.74191e-09	0.000387763	0.0735735
rs4148856	Whole_Blood	ENSG00000183955.12	KMT5A	-5.81323895143608	-0.179254	0.0308354	9.95974e-09	0.000198255	0.00383992
rs1783541	Muscle_Skeletal	ENSG00000260233.3	SSSCA1-AS1	5.79762537523829	0.207243	0.0357461	1.0596e-08	0.000327148	0.171881
rs878521	Thyroid	ENSG00000106633.15	GCK	5.80968335946031	0.242889	0.0418076	1.11019e-08	0.000250733
rs13737	Adipose_Subcutaneous	ENSG00000169371.13	SNUPN	5.80791883975751	-0.165113	0.0284289	1.11281e-08	0.000347235	0.0179232
rs76895963	Pituitary	ENSG00000118971.7	CCND2	5.95727010544515	-0.843242	0.141548	1.16201e-08	3.32384e-05
rs4776970	Colon_Transverse	ENSG00000259673.5	IQCH-AS1	5.8683006302031	-0.197712	0.0336916	1.17115e-08	0.000104825	0.128234
rs862016	Muscle_Skeletal	ENSG00000101160.13	CTSZ	5.7751487991987	-0.32345	0.0560072	1.20313e-08	0.000110033	0.000921043
rs7022807	Muscle_Skeletal	ENSG00000147874.10	HAUS6	-5.7656635747919	-0.15882	0.0275458	1.26923e-08	0.00014235	0.0955359
rs7178762	Muscle_Skeletal	ENSG00000259248.5	USP3-AS1	5.76288530298118	-0.20094	0.0348679	1.28926e-08	0.000206939	0.628973
rs601945	Adipose_Subcutaneous	ENSG00000241106.6	HLA-DOB	5.77787574513774	0.373497	0.0646425	1.31626e-08	0.000223199	0.712439
rs11642430	Muscle_Skeletal	ENSG00000102882.11	MAPK3	-5.75892010455328	-0.148133	0.0257223	1.31837e-08	0.000346658	0.105201
rs10097617	Adipose_Visceral_Omentum	ENSG00000156170.12	NDUFAF6	5.80229156557881	-0.200254	0.0345129	1.33398e-08	0.000101916	0.0981027
rs56348580	Muscle_Skeletal	ENSG00000157895.11	C12orf43	5.75477849090344	-0.147104	0.0255621	1.34946e-08	0.000262996	0.584476
rs4148856	Liver	ENSG00000111328.6	CDK2AP1	5.97177711285073	0.307123	0.0514291	1.35895e-08	6.67856e-05	0.00751743
rs8046545	Pancreas	ENSG00000184110.14	EIF3C	-5.87026887685309	0.343603	0.0585328	1.37725e-08	9.01675e-05	0.318034
rs4148856	Pancreas	ENSG00000182196.13	ARL6IP4	5.86106167060248	0.231856	0.0395586	1.44609e-08	0.000144733	0.0973105
rs7978610	Thyroid	ENSG00000119242.8	CCDC92	5.76227027132359	-0.184743	0.0320608	1.44633e-08	0.000184954	1.33876e-07
rs11926707	Pancreas	ENSG00000188086.13	PRSS45	-5.85433672239217	-0.374971	0.0640502	1.49848e-08	0.000156657	1
rs1580278	Pancreas	ENSG00000109332.19	UBE2D3	-5.85106628617692	0.176751	0.0302084	1.52462e-08	0.000157232	0.99999
rs61676547	Colon_Sigmoid	ENSG00000265055.1	AC145343.2	5.84042469060815	0.472952	0.0809791	1.53173e-08	7.5548e-05	0.0633834
rs11070332	Muscle_Skeletal	ENSG00000137877.9	SPTBN5	5.73099818506435	0.228448	0.0398617	1.54227e-08	0.00032004	0.612162
rs6600191	Thyroid	ENSG00000167930.15	FAM234A	-5.74566970389001	0.193319	0.0336461	1.586e-08	0.000157681	0.19962
rs1377807	Thyroid	ENSG00000074755.14	ZZEF1	5.73826214221607	0.115775	0.020176	1.65249e-08	0.00012944	0.0839729
rs11642430	Pancreas	ENSG00000149927.17	DOC2A	-5.83076708791803	-0.248159	0.0425602	1.69716e-08	0.000152177	0.0877968
rs11070332	Thyroid	ENSG00000103932.11	RPAP1	-5.7293548383158	-0.187116	0.0326591	1.73603e-08	0.000357625	0.755226
rs2238689	Stomach	ENSG00000125743.10	SNRPD2	-5.80926921173681	-0.151002	0.0259932	1.76787e-08	4.6392e-05
rs62492368	Adipose_Visceral_Omentum	ENSG00000002726.20	AOC1	5.74956658977364	0.334598	0.0581954	1.78096e-08	6.37455e-05	0.0235241
rs1260326	Thyroid	ENSG00000084734.8	GCKR	5.71928585216189	0.220227	0.0385061	1.83543e-08	0.000366787	0.0583204
rs6600191	Colon_Transverse	ENSG00000185615.15	PDIA2	5.78360667013704	-0.344937	0.0596404	1.84643e-08	6.91594e-05	0.407972
rs1493694	Stomach	ENSG00000134250.19	NOTCH2	-5.79934198334344	-0.214339	0.0369592	1.86342e-08	0.000104361	0.0298083
rs13737	Adipose_Visceral_Omentum	ENSG00000169371.13	SNUPN	5.73807641898185	-0.192142	0.0334854	1.8962e-08	0.000265655	0.0412906
rs4148856	Liver	ENSG00000150967.17	ABCB9	-5.90556811465119	-0.411115	0.0696149	1.89713e-08	6.00479e-05	8.77997e-06
rs62007683	Adipose_Subcutaneous	ENSG00000166166.12	TRMT61A	5.71024391994689	-0.129322	0.0226473	1.91583e-08	0.00015525	0.000958186
rs62007683	Muscle_Skeletal	ENSG00000126215.13	XRCC3	-5.68274679190649	0.155977	0.0274475	2.01939e-08	0.000137798	0.00125352
rs2727301	Adipose_Subcutaneous	ENSG00000007312.12	CD79B	5.69580282460176	-0.251805	0.0442088	2.07472e-08	0.000287577	5.11137e-05
rs8046545	Pancreas	ENSG00000251417.2	RP11-1348G14.4	5.79177761251088	-0.383477	0.0662105	2.08368e-08	7.82252e-05	0.313978
rs917195	Pituitary	ENSG00000106113.18	CRHR2	5.84087081261519	-0.290375	0.0497143	2.11591e-08	6.22555e-05	0.846799
rs3887925	Thyroid	ENSG00000073849.14	ST6GAL1	5.69254274503536	0.203129	0.0356834	2.12711e-08	0.000120636	0.995303
rs4148856	Colon_Transverse	ENSG00000182196.13	ARL6IP4	5.746196662839	0.153162	0.0266545	2.25417e-08	0.000187681	0.880462
rs862320	Muscle_Skeletal	ENSG00000141101.12	NOB1	5.66030560884902	-0.100392	0.0177361	2.28758e-08	0.000337185	0.00356255
rs7124681	Pancreas	ENSG00000165916.8	PSMC3	5.77230424850142	0.179106	0.0310284	2.30768e-08	0.000364848	0.133105
rs1061810	Small_Intestine_Terminal_Ileum	ENSG00000246250.2	RP11-613D13.5	-5.93677639002901	-0.43385	0.0730784	2.35662e-08	3.16321e-05	0.0348366
rs2727301	Small_Intestine_Terminal_Ileum	ENSG00000198909.7	MAP3K3	5.93549367201925	-0.233734	0.039379	2.37125e-08	5.65319e-05	0.00133252
rs1493694	Liver	ENSG00000134250.19	NOTCH2	-5.85808092604422	-0.471436	0.0804762	2.40668e-08	6.22221e-05	0.00139898
rs13737	Pancreas	ENSG00000169371.13	SNUPN	5.76263527655936	-0.371992	0.0645525	2.42748e-08	0.000165307	0.306187
rs11642430	Adipose_Subcutaneous	ENSG00000261367.1	RP11-455F5.4	-5.66464503106513	-0.33218	0.0586409	2.46246e-08	0.000314815	0.0808204
rs62007683	Pituitary	ENSG00000256053.7	APOPT1	5.79746523054675	-0.37078	0.0639556	2.64059e-08	6.31299e-05	0.00272572
rs5213	Colon_Sigmoid	ENSG00000188211.8	NCR3LG1	5.73470009738185	-0.216914	0.0378248	2.67624e-08	0.000107969
rs4930091	Thyroid	ENSG00000110665.11	C11orf21	-5.64786072855355	-0.188382	0.0333547	2.71804e-08	0.000111095	0.00170171
rs5758223	Adipose_Subcutaneous	ENSG00000100147.13	CCDC134	5.64527821988083	0.281866	0.0499295	2.73811e-08	0.000357253
rs3751837	Small_Intestine_Terminal_Ileum	ENSG00000103351.12	CLUAP1	5.90374613626493	0.300679	0.0509303	2.76317e-08	3.29842e-05	0.916155
rs12640250	Muscle_Skeletal	ENSG00000163257.10	DCAF16	-5.62033365298848	-0.119584	0.021277	2.85357e-08	0.000204117	0.26193
rs1580278	Muscle_Skeletal	ENSG00000109332.19	UBE2D3	-5.6197815574374	0.0810261	0.014418	2.86227e-08	0.000297064	0.999907
rs61676547	Colon_Transverse	ENSG00000265055.1	AC145343.2	5.6903405587463	0.42665	0.0749779	3.03096e-08	7.73772e-05	0.194413
rs3751837	Pancreas	ENSG00000167984.17	NLRC3	-5.71739996108101	-0.448245	0.0784002	3.0735e-08	6.60853e-05	0.967176
rs12910825	Adipose_Subcutaneous	ENSG00000166965.12	RCCD1	5.62217476928211	0.207355	0.0368816	3.10635e-08	0.000117952	0.397111
rs7124681	Muscle_Skeletal	ENSG00000030066.13	NUP160	5.60267586144505	0.175347	0.031297	3.14499e-08	0.000810627	0.0887707
rs4776970	Thyroid	ENSG00000137764.19	MAP2K5	-5.61106109108866	0.150379	0.0268004	3.32214e-08	0.000216763	0.284132
rs2238689	Thyroid	ENSG00000125743.10	SNRPD2	-5.61050892838559	-0.0903165	0.0160977	3.33213e-08	0.000135133
rs12920022	Colon_Transverse	ENSG00000167526.13	RPL13	-5.66497719660647	-0.210462	0.0371515	3.46468e-08	9.79985e-05
rs6011155	Muscle_Skeletal	ENSG00000130584.10	ZBTB46	5.57664670938262	-0.196624	0.0352585	3.62796e-08	0.000148417	0.370718
rs3768321	Thyroid	ENSG00000127603.23	MACF1	5.58957592957705	0.210559	0.0376699	3.73326e-08	0.000214743	0.132858
rs601945	Pancreas	ENSG00000232629.8	HLA-DQB2	5.67728828191296	0.536491	0.0944978	3.78459e-08	9.86148e-05	0.279629
rs4148856	Colon_Sigmoid	ENSG00000150967.17	ABCB9	-5.66817982262713	-0.232088	0.0409458	3.78752e-08	0.000162252	0.399231
rs13737	Muscle_Skeletal	ENSG00000177971.8	IMP3	-5.562790564188	0.141345	0.0254091	3.91372e-08	0.00038418	0.27591
rs11496066	Thyroid	ENSG00000170632.13	ARMC10	-5.58012107730443	0.190831	0.0341984	3.92949e-08	0.000307287	0.626598
rs4148856	Thyroid	ENSG00000150967.17	ABCB9	-5.58001059239079	-0.165037	0.0295764	3.93184e-08	0.000431506	0.280977
rs34855406	Adipose_Visceral_Omentum	ENSG00000037042.8	TUBG2	-5.60223217401559	-0.158807	0.0283472	3.94931e-08	0.000211151	0.00489337
rs11642430	Small_Intestine_Terminal_Ileum	ENSG00000090238.11	YPEL3	5.82703617531157	0.214189	0.0367579	3.99139e-08	8.52422e-05	0.0151014
rs8046545	Pituitary	ENSG00000197165.10	SULT1A2	-5.71114948882088	0.360858	0.0631848	4.08888e-08	7.44097e-05	0.107608
rs8046545	Muscle_Skeletal	ENSG00000213658.11	LAT	-5.54958655637409	0.196695	0.0354431	4.20633e-08	0.000281675	0.195254
rs862320	Whole_Blood	ENSG00000157322.17	CLEC18A	5.55014373472426	-0.18576	0.0334695	4.28828e-08	0.00028376	0.0533901
rs601945	Stomach	ENSG00000232629.8	HLA-DQB2	5.6345211054282	0.488501	0.0866978	4.42274e-08	7.50939e-05	0.207097
rs9873618	Whole_Blood	ENSG00000163584.17	RPL22L1	5.54331195646959	-0.134043	0.024181	4.45058e-08	0.000157908	0.826717
rs474513	Adipose_Subcutaneous	ENSG00000146477.5	SLC22A3	-5.54705740690236	0.179414	0.0323441	4.66809e-08	0.000195885	0.0268167
rs11496066	Muscle_Skeletal	ENSG00000168255.19	POLR2J3	-5.52737658949201	0.336853	0.0609426	4.74713e-08	0.000288493	0.036923
rs73226260	Stomach	ENSG00000241388.4	HNF1A-AS1	5.61734247380063	-0.437024	0.0777991	4.83459e-08	9.12155e-05	0.999938
rs7124681	Adipose_Visceral_Omentum	ENSG00000165917.9	RAPSN	-5.56085071752877	-0.301983	0.0543052	4.92464e-08	0.00045931	0.167977
rs4148856	Adipose_Visceral_Omentum	ENSG00000182196.13	ARL6IP4	5.56055518807475	0.138268	0.0248658	4.93238e-08	0.000191377	0.122763
rs7178762	Adipose_Subcutaneous	ENSG00000103657.13	HERC1	-5.53561876698403	0.140027	0.0252956	4.9648e-08	0.000274571	0.271756
rs11642430	Muscle_Skeletal	ENSG00000090238.11	YPEL3	5.51891935130784	0.100665	0.01824	4.97033e-08	0.000380428	0.146976
rs35895680	Thyroid	ENSG00000159210.9	SNF8	-5.53627755219054	0.111699	0.0201759	4.97844e-08	0.000273488
rs11926707	Whole_Blood	ENSG00000181555.20	SETD2	5.51725361204118	0.0925131	0.016768	5.12624e-08	0.000406196	0.999543
rs1531583	Pancreas	ENSG00000185619.18	PCGF3	-5.61810769517728	-0.556069	0.098978	5.13498e-08	8.5187e-05	0.936627
rs8046545	Stomach	ENSG00000196502.11	SULT1A1	5.59377212456408	-0.264292	0.0472476	5.46101e-08	8.20233e-05	0.0327396
rs4281707	Thyroid	ENSG00000166971.16	AKTIP	-5.51870253705359	0.154289	0.0279574	5.47136e-08	0.000165101	0.0188724
rs1260326	Colon_Transverse	ENSG00000138085.16	ATRAID	5.57456873325404	0.194034	0.0348071	5.5604e-08	0.000155774	0.975468
rs7124681	Adipose_Visceral_Omentum	ENSG00000165915.13	SLC39A13	5.52924132896449	0.147825	0.0267352	5.82383e-08	0.0004609	0.160687
rs12910825	Colon_Sigmoid	ENSG00000258725.1	PRC1-AS1	-5.58068944552409	-0.38821	0.0695632	5.95359e-08	6.31846e-05	0.90713
rs2268382	Adipose_Subcutaneous	ENSG00000259920.1	RP11-2E11.5	-5.50157864872635	-0.203476	0.0369851	5.96036e-08	0.000160259	0.215839
rs12640250	Colon_Transverse	ENSG00000163257.10	DCAF16	-5.56092157594637	-0.193064	0.034718	5.96899e-08	0.00011586	0.149122
rs11496066	Whole_Blood	ENSG00000267368.1	UPK3BL	-5.48806942814797	0.317443	0.0578424	6.0014e-08	0.000217575	0.00547374
rs4148856	Small_Intestine_Terminal_Ileum	ENSG00000111328.6	CDK2AP1	5.74008114679784	0.288841	0.0503201	6.03657e-08	7.69816e-05	2.78274e-05
rs4688760	Stomach	ENSG00000164076.16	CAMKV	5.57040926010202	0.431951	0.0775438	6.1597e-08	0.000323215	0.982865
rs11070332	Thyroid	ENSG00000243789.10	JMJD7	5.49654773802355	0.174504	0.0317479	6.16067e-08	0.000402331	0.0704094
rs3111316	Adipose_Subcutaneous	ENSG00000179218.13	CALR	5.49037866338081	0.128113	0.0233341	6.32847e-08	0.000166913	0.208698
rs7978610	Thyroid	ENSG00000250091.2	DNAH10OS	5.48255459826128	-0.205197	0.0374273	6.63877e-08	0.000178681	1.20074e-09
rs11688682	Colon_Transverse	ENSG00000163083.5	INHBB	-5.53792492866764	0.278973	0.0503751	6.72456e-08	8.01028e-05
rs8046545	Colon_Transverse	ENSG00000178952.10	TUFM	-5.53774378201206	0.117115	0.0211485	6.73086e-08	0.000121241	0.000444002
rs10097617	Colon_Transverse	ENSG00000156170.12	NDUFAF6	5.5335405362375	-0.209566	0.037872	6.87882e-08	0.000103061	0.133054
rs56348580	Colon_Sigmoid	ENSG00000157895.11	C12orf43	5.54750259367799	-0.22279	0.0401605	7.0583e-08	0.000132145	0.67635
rs3111316	Liver	ENSG00000161860.7	SYCE2	5.63983129774042	0.302789	0.0536876	7.07367e-08	3.69627e-05	0.143264
rs2028150	Pituitary	ENSG00000234255.8	AC012370.3	-5.60080929953524	0.46224	0.0825309	7.10565e-08	5.53577e-05	0.166765
rs11642430	Thyroid	ENSG00000149927.17	DOC2A	-5.46958144193846	-0.172716	0.0315776	7.11411e-08	0.000457376	0.0438262
rs4281707	Muscle_Skeletal	ENSG00000166971.16	AKTIP	-5.45049865482397	0.102398	0.0187869	7.19223e-08	0.000131276	0.0523002
rs12719778	Thyroid	ENSG00000167701.13	GPT	5.46252750590821	-0.198248	0.0362923	7.38627e-08	0.000254755	0.0245918
rs601945	Whole_Blood	ENSG00000204525.16	HLA-C	-5.44921633041973	-0.20753	0.0380844	7.39451e-08	0.000285593
rs4776970	Pituitary	ENSG00000188779.10	SKOR1	-5.58941431687526	0.365558	0.0654018	7.51987e-08	6.56839e-05	0.99173
rs1421085	Muscle_Skeletal	ENSG00000140718.20	FTO	5.44207895583466	0.142105	0.0261122	7.52477e-08	0.000128491	0.00133211
rs34855406	Thyroid	ENSG00000131470.14	PSMC3IP	5.45841290695819	0.2827	0.0517916	7.54967e-08	0.000385874	0.158238
rs4281707	Adipose_Subcutaneous	ENSG00000166971.16	AKTIP	-5.45523153629028	0.167296	0.030667	7.63283e-08	0.000134583	0.0599543
rs6884702	Stomach	ENSG00000272335.1	RP11-53O19.3	-5.52581372854542	-0.185325	0.0335381	7.74313e-08	0.000152829	0.000200134
rs12719778	Adipose_Visceral_Omentum	ENSG00000255182.2	CTD-2517M22.14	5.47474302410115	-0.217353	0.039701	7.76249e-08	0.000118763	0.323538
rs1580278	Adipose_Subcutaneous	ENSG00000145354.9	CISD2	-5.45076690829465	0.16336	0.0299702	7.81615e-08	0.000307455	0.999998
rs10937721	Adipose_Visceral_Omentum	ENSG00000109501.13	WFS1	5.46366534309767	0.200586	0.0367127	8.22709e-08	4.52184e-05	0.00159927
rs96844	Whole_Blood	ENSG00000271828.1	CTD-2310F14.1	5.42898568886064	-0.224814	0.04141	8.23943e-08	0.000120947	0.00214223
rs11642430	Colon_Sigmoid	ENSG00000149922.10	TBX6	5.51412040658357	0.275668	0.0499931	8.37009e-08	0.000181739	0.112527
rs10406431	Thyroid	ENSG00000104936.17	DMPK	5.43082320612637	-0.134456	0.0247579	8.73961e-08	0.000143026	0.161807
rs11070332	Adipose_Visceral_Omentum	ENSG00000243789.10	JMJD7	5.45091250950886	0.228017	0.0418311	8.79544e-08	0.000203381	0.344887
rs2052261	Thyroid	ENSG00000011523.13	CEP68	5.42492027340116	0.147394	0.0271698	9.0169e-08	0.000189524	2.92329e-12
rs4281707	Whole_Blood	ENSG00000262714.1	RP11-44F14.8	-5.41174736898087	0.189523	0.0350206	9.03272e-08	0.00010746	0.0408198
rs7124681	Colon_Transverse	ENSG00000165916.8	PSMC3	5.47076282951634	0.111759	0.0204285	9.504e-08	0.000376071	0.0540577
rs1783541	Adipose_Subcutaneous	ENSG00000245532.7	NEAT1	5.41328881134337	0.259308	0.047902	9.5332e-08	0.000290075	0.0978783
rs2233632	Adipose_Visceral_Omentum	ENSG00000065060.16	UHRF1BP1	-5.43232392974051	-0.224442	0.041316	9.69275e-08	0.000161876	0.499587
rs1316776	Pituitary	ENSG00000145692.14	BHMT	5.53486968961388	-0.429558	0.0776093	9.8521e-08	6.37894e-05	0.0254777
rs3751837	Muscle_Skeletal	ENSG00000126602.10	TRAP1	5.39158413230569	0.169868	0.0315061	9.85544e-08	0.000139809	5.61135e-06
rs2581787	Muscle_Skeletal	ENSG00000055955.15	ITIH4	5.38981420651251	0.126153	0.0234059	9.94871e-08	0.000361124	0.0692957
rs4688760	Stomach	ENSG00000186792.16	HYAL3	-5.47645642762461	-0.251113	0.0458532	9.95847e-08	0.000293656	0.98719
rs56348580	Whole_Blood	ENSG00000157895.11	C12orf43	5.39099750534968	-0.167222	0.0310188	1.00862e-07	0.00020351	0.711898
rs2268382	Adipose_Visceral_Omentum	ENSG00000272701.2	MESTIT1	-5.42146605562441	-0.161959	0.0298736	1.02574e-07	0.000100498	0.114739
rs1580278	Thyroid	ENSG00000145354.9	CISD2	-5.39746810712987	0.103359	0.0191495	1.04227e-07	0.000384017	0.999985
rs6600191	Adipose_Visceral_Omentum	ENSG00000167930.15	FAM234A	-5.41082628613559	0.156562	0.0289349	1.08416e-07	8.38624e-05	0.046187
rs2268382	Adipose_Subcutaneous	ENSG00000270953.1	RP11-2E11.9	-5.38463554034155	-0.217915	0.0404697	1.10877e-07	0.000168006	0.0770271
rs145904381	Whole_Blood	ENSG00000143363.15	PRUNE1	5.37220782678845	-0.467956	0.0871068	1.11424e-07	0.000311091	0.778457
rs1316776	Adipose_Visceral_Omentum	ENSG00000145692.14	BHMT	5.40167517674993	-0.301069	0.0557362	1.13699e-07	0.000100424	0.11784
rs12719778	Thyroid	ENSG00000196378.11	ZNF34	-5.37521279405885	0.183038	0.0340522	1.17165e-07	0.000323697	0.120854
rs4929965	Pancreas	ENSG00000180176.14	TH	5.4547078959395	-0.373131	0.0684053	1.17816e-07	4.09293e-05	0.0719457
rs5213	Whole_Blood	ENSG00000070081.15	NUCB2	5.35493470328557	-0.120304	0.022466	1.22074e-07	0.000184266
rs2581787	Colon_Transverse	ENSG00000055955.15	ITIH4	5.42149154897137	0.176637	0.0325809	1.22248e-07	0.000194826	0.116795
rs601945	Thyroid	ENSG00000196126.11	HLA-DRB1	-5.36558016963468	-0.250186	0.0466279	1.23237e-07	0.000286597	0.021016
rs75423501	Muscle_Skeletal	ENSG00000164053.19	ATRIP	-5.34895480362109	-0.256525	0.047958	1.2356e-07	0.000709784
rs2581787	Colon_Sigmoid	ENSG00000055955.15	ITIH4	5.43611131700345	0.220658	0.0405912	1.24291e-07	0.000182046	0.0178506
rs5758223	Whole_Blood	ENSG00000100418.7	DESI1	5.35011210929157	0.147331	0.0275379	1.2522e-07	0.000321258
rs6600191	Colon_Transverse	ENSG00000242173.8	ARHGDIG	5.41204988857509	-0.290092	0.0536011	1.28264e-07	7.14329e-05	0.0181995
rs34855406	Colon_Sigmoid	ENSG00000037042.8	TUBG2	-5.42646692125684	-0.191732	0.0353328	1.3048e-07	0.000166504	0.0238889
rs72802342	Whole_Blood	ENSG00000050820.16	BCAR1	5.33649248261651	-0.293023	0.0549093	1.34534e-07	0.000154135	0.338157
rs56348580	Colon_Sigmoid	ENSG00000157837.15	SPPL3	5.41893864527878	-0.226728	0.04184	1.35518e-07	0.000127412	0.99062
rs80147536	Adipose_Subcutaneous	ENSG00000234936.1	AC010883.5	5.34391927730534	-0.403116	0.0754346	1.37267e-07	0.000211303	0.160162
rs8046545	Muscle_Skeletal	ENSG00000176476.8	SGF29	5.3254248620194	-0.103644	0.0194622	1.39894e-07	0.00022901	0.004327
rs8046545	Colon_Sigmoid	ENSG00000197165.10	SULT1A2	-5.41204998413177	0.325406	0.0601263	1.40294e-07	0.000117939	0.0146339
rs3111316	Thyroid	ENSG00000179218.13	CALR	5.34062158662154	0.0905143	0.0169483	1.40423e-07	0.000191322	0.475094
rs8046545	Whole_Blood	ENSG00000184110.14	EIF3C	-5.32738481875223	0.162137	0.0304347	1.41134e-07	0.00019723	0.202825
rs96844	Thyroid	ENSG00000225940.5	C5orf67	5.32738734191249	-0.279818	0.0525245	1.50457e-07	0.000202779	0.0398043
rs2727301	Adipose_Subcutaneous	ENSG00000198909.7	MAP3K3	5.31538794117189	-0.13779	0.0259229	1.5929e-07	0.000229404	4.59765e-06
rs3111316	Colon_Transverse	ENSG00000105607.12	GCDH	-5.36342601317247	-0.173017	0.0322587	1.64104e-07	9.35393e-05	0.227492
rs12910825	Muscle_Skeletal	ENSG00000166965.12	RCCD1	5.28890027966185	0.151378	0.0286219	1.6947e-07	0.000149249	0.946299
rs2972144	Adipose_Subcutaneous	ENSG00000261379.1	RP11-395N3.1	-5.3022117174669	-0.230516	0.0434754	1.70583e-07	0.000156384
rs3934712	Adipose_Subcutaneous	ENSG00000276778.1	RP11-524N5.1	-5.28753901507625	-0.248098	0.0469212	1.84073e-07	0.000238717	0.000443716
rs601945	Colon_Transverse	ENSG00000232629.8	HLA-DQB2	5.33717423658826	0.452165	0.0847199	1.87322e-07	0.000125967	0.254813
rs2280141	Whole_Blood	ENSG00000107679.14	PLEKHA1	-5.27320651957929	0.0728447	0.0138141	1.87386e-07	0.000106797	0.0129695
rs7124681	Adipose_Subcutaneous	ENSG00000134575.9	ACP2	5.27361964107095	0.12398	0.0235095	1.97822e-07	0.000665957	0.259732
rs340874	Stomach	ENSG00000274895.1	RP11-478J18.2	5.33743489684878	0.250448	0.0469228	2.00473e-07	6.02139e-05	0.999865
rs1708302	Adipose_Subcutaneous	ENSG00000234336.6	JAZF1-AS1	5.2692793801537	-0.251271	0.047686	2.02309e-07	0.000138417	0.196334
rs28505901	Muscle_Skeletal	ENSG00000213221.4	DNLZ	-5.25149855137567	0.221506	0.0421795	2.06007e-07	8.68143e-05	0.137592
rs11642430	Muscle_Skeletal	ENSG00000183336.8	BOLA2	-5.24812584987359	-0.214624	0.0408954	2.09653e-07	0.000307224
rs3111316	Muscle_Skeletal	ENSG00000179218.13	CALR	5.24732884089933	0.143759	0.0273966	2.10524e-07	0.000174741	0.384484
rs3768321	Thyroid	ENSG00000228060.1	RP11-69E11.8	-5.25247632136669	-0.326626	0.0621852	2.21774e-07	0.000229025	0.0321182
rs5758223	Liver	ENSG00000100395.14	L3MBTL2	5.39514912275709	0.313697	0.0581443	2.29722e-07	0.000103531	0.0798816
rs12719778	Adipose_Subcutaneous	ENSG00000196378.11	ZNF34	-5.23408020474332	0.167743	0.0320482	2.42531e-07	0.000302918	0.375434
rs1316776	Adipose_Visceral_Omentum	ENSG00000132837.14	DMGDH	5.25348820830583	-0.172655	0.0328648	2.43443e-07	9.35803e-05	0.0366052
rs116913033	Adipose_Subcutaneous	ENSG00000015676.17	NUDCD3	5.23180581932855	-0.210569	0.0402479	2.45381e-07	0.000197298	0.352161
rs1801212	Adipose_Visceral_Omentum	ENSG00000109501.13	WFS1	5.25145486730072	0.217453	0.0414081	2.45971e-07	4.52184e-05	0.853811
rs6600191	Colon_Sigmoid	ENSG00000167930.15	FAM234A	-5.29894201950293	0.213965	0.0403787	2.46584e-07	7.51589e-05	0.0618818
rs3111316	Colon_Transverse	ENSG00000179218.13	CALR	5.28148967770291	0.119224	0.022574	2.47615e-07	9.56837e-05	0.353944
rs2268078	Adipose_Subcutaneous	ENSG00000101460.12	MAP1LC3A	5.22722069043527	0.149409	0.0285828	2.51225e-07	0.000457838
rs1377807	Thyroid	ENSG00000167740.9	CYB5D2	5.2237560402939	0.125507	0.0240262	2.57029e-07	0.000133673	0.463908
rs601945	Thyroid	ENSG00000196735.11	HLA-DQA1	-5.22248972490459	-0.268712	0.0514529	2.58702e-07	0.000266542	0.0817411
rs3111316	Stomach	ENSG00000105607.12	GCDH	-5.28608467766008	-0.214949	0.0406631	2.58711e-07	5.87514e-05	0.422323
rs28505901	Pancreas	ENSG00000148396.18	SEC16A	-5.2961236210115	0.209081	0.0394781	2.59289e-07	4.04556e-05	0.0913423
rs1801212	Adipose_Subcutaneous	ENSG00000109501.13	WFS1	5.21832769739711	0.191836	0.0367619	2.62947e-07	7.45026e-05	0.345349
rs1801212	Muscle_Skeletal	ENSG00000109501.13	WFS1	5.20193753565314	0.215536	0.0414338	2.66342e-07	7.5123e-05	0.514609
rs1531583	Colon_Transverse	ENSG00000185619.18	PCGF3	-5.26135841582357	-0.498427	0.0947334	2.73747e-07	0.000117126	0.892419
rs56348580	Colon_Transverse	ENSG00000157895.11	C12orf43	5.25605718797879	-0.161389	0.0307053	2.81062e-07	0.000121974	0.331661
rs4148856	Adipose_Visceral_Omentum	ENSG00000051825.14	MPHOSPH9	-5.22453068501288	-0.183327	0.0350897	2.8193e-07	0.00018466	0.235269
rs56348580	Thyroid	ENSG00000157895.11	C12orf43	5.20461375739114	-0.191193	0.0367353	2.83481e-07	0.000295881	0.211246
rs4932265	Colon_Transverse	ENSG00000242498.7	ARPIN	-5.25278294623538	0.132137	0.0251557	2.85674e-07	7.49648e-05	0.0264622
rs4688760	Pituitary	ENSG00000164068.15	RNF123	5.31298636560913	0.2654	0.0499531	2.90193e-07	0.000275318	0.970204
rs1005752	Whole_Blood	ENSG00000140391.14	TSPAN3	5.18056683121866	0.17857	0.0344692	3.0252e-07	0.000309127	0.0464169
rs4930091	Adipose_Subcutaneous	ENSG00000110665.11	C11orf21	-5.18623805101022	-0.168237	0.0324391	3.09812e-07	8.86819e-05	0.00407045
rs1783541	Muscle_Skeletal	ENSG00000172922.8	RNASEH2C	-5.16955556684705	-0.151528	0.0293116	3.14659e-07	0.000339326	0.101501
rs4688760	Pituitary	ENSG00000173531.15	MST1	5.2885185548041	0.268899	0.0508458	3.263e-07	0.000288922	0.922074
rs3810291	Thyroid	ENSG00000142230.11	SAE1	-5.1764902725483	-0.0995791	0.0192368	3.27182e-07	0.000163514	0.265195
rs4923543	Adipose_Subcutaneous	ENSG00000169519.20	METTL15	-5.16573803272551	-0.15573	0.0301466	3.43883e-07	0.000417697	0.19466
rs11642430	Pancreas	ENSG00000183336.8	BOLA2	-5.23503238845052	-0.389014	0.0743097	3.49758e-07	0.00014978
rs1580278	Liver	ENSG00000164039.14	BDH2	5.30545139013962	-0.285444	0.053802	3.50806e-07	5.56204e-05	0.997788
rs11699802	Whole_Blood	ENSG00000224397.5	SMIM25	5.15163471676376	-0.0832181	0.0161537	3.50813e-07	0.000107848	0.03105
rs11070332	Thyroid	ENSG00000092445.11	TYRO3	5.16118718274418	0.216922	0.0420295	3.53632e-07	0.000360882	0.705194
rs11688682	Adipose_Visceral_Omentum	ENSG00000163083.5	INHBB	-5.17834001246744	0.195432	0.0377403	3.55817e-07	9.62301e-05
rs62007683	Muscle_Skeletal	ENSG00000166166.12	TRMT61A	5.14040253091869	-0.105027	0.0204317	3.65334e-07	0.000194428	0.00993676
rs12642790	Pituitary	ENSG00000145284.11	SCD5	5.26399288686592	-0.249511	0.0473996	3.66862e-07	7.63002e-05
rs28505901	Whole_Blood	ENSG00000187796.13	CARD9	5.13960703126443	-0.123918	0.0241104	3.73014e-07	8.16886e-05	0.106273
rs11926707	Adipose_Subcutaneous	ENSG00000160801.13	PTH1R	-5.14836779288894	-0.151835	0.0294918	3.75566e-07	0.000480212	0.999949
rs12719778	Thyroid	ENSG00000187954.12	CYHR1	5.14784905993883	-0.097441	0.0189285	3.78364e-07	0.000245583	0.188879
rs8046545	Stomach	ENSG00000196993.8	NPIPB9	5.20836153069812	-0.354655	0.0680933	3.7925e-07	6.86041e-05	0.00144826
rs75423501	Whole_Blood	ENSG00000114650.18	SCAP	5.13499276982668	0.133238	0.025947	3.81887e-07	0.0004439	0.0289519
rs11496066	Adipose_Subcutaneous	ENSG00000267368.1	UPK3BL	-5.14157184249045	0.344245	0.0669533	3.88716e-07	0.000260969	0.0394065
rs2727301	Adipose_Subcutaneous	ENSG00000266173.6	STRADA	5.14073239702961	-0.174515	0.0339474	3.90371e-07	0.000255623	0.0141192
rs57235767	Pancreas	ENSG00000166002.6	SMCO4	-5.21227280438105	0.230075	0.044141	3.90758e-07	0.000117591	0.807563
rs1316776	Thyroid	ENSG00000132837.14	DMGDH	5.13821258289011	-0.220989	0.0430088	3.97267e-07	0.000177199	0.0386178
rs2767036	Whole_Blood	ENSG00000149089.12	APIP	5.12685313287328	-0.148581	0.0289809	3.98039e-07	0.000109646	0.0237398
rs3111316	Colon_Sigmoid	ENSG00000179218.13	CALR	5.20110942156777	0.19673	0.0378246	3.98744e-07	8.6626e-05	0.307496
rs11070332	Pituitary	ENSG00000103932.11	RPAP1	-5.24176429343788	-0.249378	0.0475753	4.07832e-07	0.00011268	0.448094
rs11699802	Stomach	ENSG00000231742.5	LINC01273	5.19262223675889	-0.343974	0.0662429	4.09579e-07	5.10254e-05	0.140779
rs4688760	Liver	ENSG00000004534.14	RBM6	-5.27146193223232	-0.293785	0.0557311	4.11353e-07	0.000177939	0.928597
rs4148856	Pancreas	ENSG00000183955.12	KMT5A	5.19712440177737	0.329895	0.0634764	4.20593e-07	0.00011455	1.57547e-08
rs4776970	Muscle_Skeletal	ENSG00000137764.19	MAP2K5	-5.10452975885829	0.140086	0.0274434	4.38589e-07	0.000200242	0.059621
rs4923543	Thyroid	ENSG00000169519.20	METTL15	-5.11003879731809	-0.1659	0.0324655	4.57921e-07	0.000403422	0.0424426
rs58730668	Muscle_Skeletal	ENSG00000164306.10	PRIMPOL	5.09560689832303	-0.234126	0.0459466	4.58907e-07	0.00011078	0.0432262
rs17122772	Thyroid	ENSG00000155463.12	OXA1L	-5.10900755708161	-0.147849	0.0289389	4.60303e-07	0.000117623	0.341389
rs3751837	Liver	ENSG00000103351.12	CLUAP1	5.24115636725725	0.394913	0.0753485	4.73829e-07	3.53896e-05	0.822275
rs2581787	Adipose_Visceral_Omentum	ENSG00000163935.13	SFMBT1	5.12031310767987	0.208928	0.0408038	4.75536e-07	0.000186956	0.0844004
rs2238689	Adipose_Visceral_Omentum	ENSG00000125743.10	SNRPD2	-5.11096756226926	-0.0977871	0.0191328	4.98152e-07	8.69522e-05
rs2581787	Whole_Blood	ENSG00000055955.15	ITIH4	5.08120846476396	0.145745	0.0286831	5.01607e-07	0.000311429	0.306647
rs1641523	Muscle_Skeletal	ENSG00000161958.10	FGF11	5.06530367931955	-0.185297	0.0365817	5.34932e-07	0.000115568	0.707234
rs61676547	Adipose_Visceral_Omentum	ENSG00000278740.1	RP11-147L13.14	5.0912295116365	0.263991	0.0518521	5.49389e-07	9.3704e-05	0.0555174
rs1783541	Whole_Blood	ENSG00000173442.12	EHBP1L1	-5.06044189535777	-0.113998	0.0225273	5.56936e-07	0.000273439	0.00509743
rs4977213	Pancreas	ENSG00000071894.16	CPSF1	-5.13441261741481	0.366081	0.0712996	5.69395e-07	9.09505e-05	0.043106
rs1708302	Colon_Sigmoid	ENSG00000234336.6	JAZF1-AS1	5.12546323939683	-0.231793	0.0452238	5.75549e-07	7.06397e-05	0.268245
rs4457053	Adipose_Subcutaneous	ENSG00000113231.13	PDE8B	-5.05825629041774	0.113636	0.0224655	5.90904e-07	0.000145006	0.356112
rs5758223	Colon_Transverse	ENSG00000235513.1	RP4-756G23.5	5.10050295379525	0.243256	0.0476925	6.03792e-07	0.000271128	0.166898
rs8046545	Small_Intestine_Terminal_Ileum	ENSG00000178952.10	TUFM	-5.22930101978481	0.143881	0.0275143	6.38046e-07	6.56673e-05	0.0743916
rs1127215	Whole_Blood	ENSG00000134256.12	CD101	-5.03243433148068	0.155334	0.0308665	6.40975e-07	0.000147966	0.874864
rs11688682	Colon_Sigmoid	ENSG00000163083.5	INHBB	-5.10188621616991	0.311304	0.0610174	6.44762e-07	8.18946e-05
rs59944054	Muscle_Skeletal	ENSG00000125510.15	OPRL1	-5.02664658037858	-0.256697	0.0510671	6.49726e-07	0.000186464	0.0359891
rs862320	Thyroid	ENSG00000141101.12	NOB1	5.03905047800886	-0.135056	0.0268019	6.53152e-07	0.000405604	0.0650402
rs5758223	Whole_Blood	ENSG00000100147.13	CCDC134	5.02488465461012	0.205681	0.0409324	6.65648e-07	0.000278664
rs5213	Colon_Sigmoid	ENSG00000260196.1	RP1-239B22.5	5.09470707856417	-0.231555	0.0454502	6.67395e-07	0.000116208
rs8046545	Colon_Sigmoid	ENSG00000213658.11	LAT	-5.09190310127711	0.200216	0.0393204	6.76441e-07	0.000114843	0.134822
rs4925109	Adipose_Subcutaneous	ENSG00000197815.4	RP1-253P7.4	5.03097485407116	-0.170495	0.033889	6.76912e-07	0.000282931	0.868449
rs3751837	Thyroid	ENSG00000213918.10	DNASE1	-5.0312399041022	-0.0980184	0.019482	6.79004e-07	0.000147309	0.24269
rs8046545	Stomach	ENSG00000178952.10	TUFM	-5.0860404535489	0.118687	0.0233358	6.86404e-07	9.51453e-05	0.000768767
rs601945	Pituitary	ENSG00000196735.11	HLA-DQA1	-5.13137999051695	-0.374615	0.0730048	6.86749e-07	8.86059e-05	0.412338
rs2581787	Whole_Blood	ENSG00000163935.13	SFMBT1	5.01552648289534	0.120298	0.0239851	6.97506e-07	0.000231357	0.00492451
rs5758223	Whole_Blood	ENSG00000167074.14	TEF	5.00980605472467	0.168785	0.033691	7.177e-07	0.000411707	0.114809
rs4776970	Adipose_Subcutaneous	ENSG00000137764.19	MAP2K5	-5.0144098994456	0.139314	0.0277827	7.34912e-07	0.000164654	0.0430513
rs12719778	Thyroid	ENSG00000161016.17	RPL8	5.01123008099919	-0.0797897	0.0159222	7.49827e-07	0.000368461	0.0150046
rs34855406	Pancreas	ENSG00000131470.14	PSMC3IP	5.07441308204125	0.325222	0.0640905	7.58857e-07	0.000136143	0.221326
rs8046545	Adipose_Subcutaneous	ENSG00000196502.11	SULT1A1	5.00606001035188	-0.222611	0.0444682	7.6594e-07	0.000236848	0.0488013
rs1783541	Adipose_Visceral_Omentum	ENSG00000172803.17	SNX32	5.02367761011727	0.353742	0.070415	7.66272e-07	0.000256981	0.117044
rs1708302	Liver	ENSG00000153814.11	JAZF1	5.13663908899962	-0.396356	0.0771625	7.68435e-07	3.20115e-05	0.248035
rs11642430	Small_Intestine_Terminal_Ileum	ENSG00000149927.17	DOC2A	-5.18684229686899	-0.328097	0.0632556	7.71692e-07	8.96064e-05	0.0848644
rs10097617	Whole_Blood	ENSG00000253878.5	RP11-347C18.3	-4.99204562982341	0.244623	0.0490026	7.84061e-07	0.000150177	0.201431
rs8046545	Pituitary	ENSG00000178188.14	SH2B1	5.10223148924845	-0.145851	0.0285856	7.87042e-07	8.89112e-05	0.0893973
rs4148856	Small_Intestine_Terminal_Ileum	ENSG00000051825.14	MPHOSPH9	-5.1735045395968	-0.247021	0.0477474	8.1904e-07	7.20037e-05	1.645e-06
rs58730668	Adipose_Subcutaneous	ENSG00000164306.10	PRIMPOL	4.99175456708006	-0.225576	0.0451898	8.22063e-07	9.44498e-05	0.0371368
rs4776970	Colon_Transverse	ENSG00000188779.10	SKOR1	-5.03557597151494	0.154836	0.0307484	8.26437e-07	9.39815e-05	0.997501
rs474513	Thyroid	ENSG00000146477.5	SLC22A3	-4.98213752133007	0.183661	0.0368639	8.6567e-07	0.000220628	0.071555
rs11688682	Muscle_Skeletal	ENSG00000163083.5	INHBB	-4.96617723290726	0.159624	0.0321423	8.78397e-07	0.000152132
rs7178762	Colon_Transverse	ENSG00000197361.7	FBXL22	5.02213224996911	-0.0983725	0.0195878	8.81591e-07	0.000117225	0.405542
rs2268078	Stomach	ENSG00000101460.12	MAP1LC3A	5.03267964085143	0.18856	0.0374672	8.86177e-07	0.000164
rs11257655	Whole_Blood	ENSG00000228302.2	RP11-186N15.3	4.96654097621038	0.140713	0.0283322	8.89816e-07	8.41989e-05	0.999999
rs1316776	Colon_Sigmoid	ENSG00000132837.14	DMGDH	5.0291888578795	-0.257991	0.0512987	9.12813e-07	7.45101e-05	0.0298679
rs12001437	Muscle_Skeletal	ENSG00000164978.17	NUDT2	-4.95809530548672	-0.216592	0.0436846	9.14306e-07	0.000377431	1
rs7178762	Colon_Sigmoid	ENSG00000197361.7	FBXL22	5.02064325479619	-0.150732	0.0300225	9.50653e-07	0.000105177	0.677618
rs6600191	Whole_Blood	ENSG00000167930.15	FAM234A	-4.95220079092853	0.184531	0.0372624	9.55192e-07	0.000103137	0.0469682
rs2872246	Pituitary	ENSG00000114770.16	ABCC5	5.05999624172219	-0.229968	0.0454483	9.57978e-07	5.13039e-05	0.17735
rs5758223	Thyroid	ENSG00000235513.1	RP4-756G23.5	4.96055188388492	0.203752	0.0410744	9.62603e-07	0.000554276	0.204225
rs3810291	Muscle_Skeletal	ENSG00000142230.11	SAE1	-4.94686823508133	-0.130767	0.0264342	9.66547e-07	0.000142675	0.290747
rs1260326	Adipose_Visceral_Omentum	ENSG00000115216.13	NRBP1	-4.97567107980189	-0.149075	0.0299609	9.68544e-07	0.000174326	0.990407
rs4688760	Adipose_Subcutaneous	ENSG00000164078.12	MST1R	4.95807113906733	0.210668	0.0424899	9.70339e-07	0.00108471	0.970969
rs7115753	Thyroid	ENSG00000205106.4	DKFZp779M0652	-4.95788712121717	0.253806	0.0511924	9.75273e-07	0.000234537	0.224652
rs4977213	Adipose_Subcutaneous	ENSG00000260428.2	SCX	-4.95614910951553	0.204353	0.0412322	9.79537e-07	0.000166941	0.0377857
rs7124681	Adipose_Visceral_Omentum	ENSG00000165916.8	PSMC3	4.97244599703026	0.0993517	0.0199804	9.83842e-07	0.000474915	0.21937
rs11070332	Thyroid	ENSG00000137877.9	SPTBN5	4.95294462458151	0.220214	0.0444612	9.99199e-07	0.000363818	0.314475
rs11070332	Whole_Blood	ENSG00000243789.10	JMJD7	4.94227942052907	0.132512	0.0268119	1.00311e-06	0.000272785	0.394146
rs2268382	Adipose_Subcutaneous	ENSG00000158623.14	COPG2	-4.95076433340423	-0.187336	0.0378397	1.00576e-06	0.000157701	0.0403999
rs10406431	Whole_Blood	ENSG00000267757.4	EML2-AS1	-4.94147426121912	0.180205	0.0364678	1.0071e-06	0.000101037	0.153993
rs4148856	Small_Intestine_Terminal_Ileum	ENSG00000150967.17	ABCB9	-5.12691909682302	-0.399627	0.0779469	1.00766e-06	7.06804e-05	0.0359038
rs4688760	Pancreas	ENSG00000182179.12	UBA7	-5.0144968675717	-0.263486	0.0525449	1.00841e-06	0.000426036	0.960115
rs57327348	Thyroid	ENSG00000171044.10	XKR6	4.95078864889519	-0.219715	0.0443797	1.00981e-06	0.000173686	0.997751
rs35654957	Thyroid	ENSG00000145214.13	DGKQ	-4.95050458903695	-0.15503	0.031316	1.01122e-06	0.000222301	1
rs2456530	Pancreas	ENSG00000259203.1	RP11-209K10.2	-5.01195743242018	-0.449988	0.089783	1.02058e-06	8.0898e-05	0.925546
rs2233632	Adipose_Subcutaneous	ENSG00000065060.16	UHRF1BP1	-4.94707763063936	-0.156803	0.031696	1.0241e-06	0.000275372	0.485343
rs1801645	Whole_Blood	ENSG00000198355.4	PIM3	-4.93487186883197	0.14505	0.0293928	1.04039e-06	8.15044e-05	0.659978
rs76895963	Thyroid	ENSG00000118971.7	CCND2	4.94381910152398	-0.649219	0.131319	1.04487e-06	0.000124421
rs601945	Colon_Transverse	ENSG00000196735.11	HLA-DQA1	-4.98578126186036	-0.255489	0.0512436	1.04916e-06	0.000144656	0.479055
rs601945	Colon_Sigmoid	ENSG00000241106.6	HLA-DOB	4.99965505585313	0.442401	0.0884863	1.05015e-06	0.000126575	0.36101
rs3811978	Adipose_Subcutaneous	ENSG00000152684.10	PELO	-4.94099003396285	-0.162865	0.0329619	1.05509e-06	0.000257443	0.499098
rs4281707	Whole_Blood	ENSG00000166971.16	AKTIP	4.93129426591971	-0.0885683	0.0179605	1.05887e-06	0.000101496	0.103447
rs474513	Adipose_Visceral_Omentum	ENSG00000146477.5	SLC22A3	-4.95163977847522	0.150034	0.0302998	1.0883e-06	0.000116205	0.00695019
rs28505901	Thyroid	ENSG00000165689.16	SDCCAG3	-4.93288966234645	0.127363	0.0258192	1.10223e-06	8.36152e-05	0.042702
rs3111316	Pancreas	ENSG00000179218.13	CALR	4.99362504802739	0.128751	0.0257831	1.11274e-06	8.07393e-05	0.539819
rs8046545	Muscle_Skeletal	ENSG00000251417.2	RP11-1348G14.4	4.91561050770066	-0.235565	0.0479218	1.12762e-06	0.000250636	0.000816517
rs1260326	Pancreas	ENSG00000115241.10	PPM1G	-4.98780043080995	-0.146117	0.0292949	1.14367e-06	0.000122029	0.97304
rs3111316	Stomach	ENSG00000179115.10	FARSA	-4.9757007044722	-0.109604	0.0220279	1.16144e-06	6.44905e-05	0.154323
rs2796441	Colon_Sigmoid	ENSG00000233926.1	RP11-154D17.1	4.97615440443961	-0.366768	0.0737052	1.17352e-06	9.33613e-05	0.824533
rs28505901	Adipose_Subcutaneous	ENSG00000165689.16	SDCCAG3	-4.91320950458512	0.139435	0.0283796	1.20839e-06	8.33141e-05	0.221003
rs3751837	Adipose_Subcutaneous	ENSG00000126602.10	TRAP1	4.90511662097973	0.254801	0.0519459	1.25695e-06	0.000146587	0.960459
rs738408	Pituitary	ENSG00000100347.14	SAMM50	5.00059688536226	0.253232	0.0506404	1.26053e-06	2.76725e-05	0.323851
rs73226260	Colon_Transverse	ENSG00000241388.4	HNF1A-AS1	4.9427181789828	-0.267103	0.0540397	1.2877e-06	0.000115814	0.999436
rs5758223	Whole_Blood	ENSG00000184068.2	RP5-821D11.7	4.89096400366861	0.164091	0.0335498	1.29039e-06	0.000265877
rs61676547	Adipose_Subcutaneous	ENSG00000278730.1	RP11-147L13.11	4.89177482941176	0.236505	0.0483476	1.34114e-06	0.000147682	0.112141
rs1783541	Colon_Sigmoid	ENSG00000168056.15	LTBP3	4.94774679775181	0.211293	0.0427049	1.34144e-06	0.00014172	0.170277
rs7124681	Thyroid	ENSG00000165917.9	RAPSN	-4.89241984641499	-0.232664	0.047556	1.34226e-06	0.000899788	0.192763
rs1783541	Colon_Transverse	ENSG00000245532.7	NEAT1	4.92936138584038	0.298578	0.0605714	1.37179e-06	0.000165345	0.0353555
rs11642430	Muscle_Skeletal	ENSG00000169592.14	INO80E	-4.87176458273117	-0.1265	0.025966	1.3978e-06	0.000348748	0.0819239
rs11642430	Colon_Transverse	ENSG00000149922.10	TBX6	4.92371020208112	0.250078	0.0507905	1.40895e-06	0.000178817	0.0238796
rs11642430	Adipose_Subcutaneous	ENSG00000169203.16	NPIPB12	4.87478963529121	0.245745	0.0504114	1.45622e-06	0.000289527
rs8046545	Stomach	ENSG00000178188.14	SH2B1	4.92766754053626	-0.13904	0.0282162	1.45626e-06	7.79412e-05	0.0128778
rs601945	Adipose_Visceral_Omentum	ENSG00000223534.1	HLA-DQB1-AS1	-4.88770145382478	-0.322528	0.0659877	1.48073e-06	0.00016615	0.268501
rs58730668	Muscle_Skeletal	ENSG00000151725.11	CENPU	-4.85984145596931	0.270099	0.0555778	1.48145e-06	9.43215e-05	0.0185025
rs59944054	Adipose_Subcutaneous	ENSG00000125510.15	OPRL1	-4.86646319982962	-0.210965	0.0433509	1.51606e-06	0.000180626	0.0597715
rs57327348	Thyroid	ENSG00000255310.2	AF131215.2	-4.86632628713107	0.240501	0.0494215	1.52297e-06	0.000181813	0.747036
rs7222481	Colon_Sigmoid	ENSG00000109047.7	RCVRN	-4.91571744016616	-0.367246	0.0747084	1.55866e-06	4.56729e-05	0.0450718
rs11070332	Small_Intestine_Terminal_Ileum	ENSG00000103932.11	RPAP1	-5.02795012404125	-0.28759	0.0571982	1.55915e-06	7.89498e-05	0.638178
rs2972144	Adipose_Visceral_Omentum	ENSG00000272622.1	RP11-395N3.2	-4.87529701105078	-0.192584	0.039502	1.57129e-06	0.000107452
rs34855406	Pituitary	ENSG00000037042.8	TUBG2	-4.95207918057194	-0.24199	0.0488663	1.57462e-06	0.000111703	0.140725
rs601945	Adipose_Subcutaneous	ENSG00000225914.1	XXbac-BPG154L12.4	4.85397805195872	0.36048	0.0742648	1.61025e-06	0.000250359	0.373909
rs2307111	Adipose_Subcutaneous	ENSG00000152359.14	POC5	4.85056984877766	-0.15253	0.0314458	1.63692e-06	0.000179676	0.43416
rs8046545	Adipose_Visceral_Omentum	ENSG00000196502.11	SULT1A1	4.86596440865373	-0.272551	0.0560116	1.64292e-06	0.000164403	0.0372215
rs62007683	Whole_Blood	ENSG00000166166.12	TRMT61A	4.84068403008824	-0.0968681	0.0200112	1.64793e-06	0.000136422	0.0307361
rs62007683	Adipose_Subcutaneous	ENSG00000126215.13	XRCC3	-4.84904171624333	0.148023	0.0305262	1.64902e-06	0.000130959	0.00633348
rs117001013	Thyroid	ENSG00000128253.13	RFPL2	-4.83986043542449	0.479794	0.0991339	1.73013e-06	0.000219511	0.5
rs340874	Colon_Transverse	ENSG00000274895.1	RP11-478J18.2	4.87520428623819	0.233228	0.0478396	1.77049e-06	8.77583e-05	1
rs12920022	Colon_Sigmoid	ENSG00000167526.13	RPL13	-4.88624379465844	-0.209316	0.0428379	1.78833e-06	8.4131e-05
rs4776970	Adipose_Subcutaneous	ENSG00000259673.5	IQCH-AS1	4.82874757010003	-0.146619	0.0303638	1.8181e-06	0.000169493	0.766309
rs3751837	Colon_Transverse	ENSG00000140623.13	SEPT12	4.86752580250263	0.389015	0.0799205	1.83538e-06	5.70621e-05
rs57327348	Adipose_Subcutaneous	ENSG00000255310.2	AF131215.2	-4.82531946123078	0.254758	0.0527961	1.84827e-06	0.000153352	0.991284
rs601945	Colon_Sigmoid	ENSG00000196126.11	HLA-DRB1	4.8736287278019	0.324802	0.0666448	1.89633e-06	0.000110308	0.583027
rs862320	Muscle_Skeletal	ENSG00000157322.17	CLEC18A	4.8082061085538	-0.218376	0.0454173	1.90279e-06	0.000327487	0.118279
rs2280141	Colon_Transverse	ENSG00000107679.14	PLEKHA1	-4.85972180415301	0.150767	0.0310238	1.90368e-06	7.81711e-05	0.335745
rs8046545	Adipose_Visceral_Omentum	ENSG00000178952.10	TUFM	-4.82793591830123	0.0830196	0.0171957	1.96875e-06	0.000131439	4.59714e-05
rs1377807	Adipose_Subcutaneous	ENSG00000167740.9	CYB5D2	4.81211383417131	0.15605	0.0324286	1.96903e-06	0.000114698	0.141394
rs6459733	Muscle_Skeletal	ENSG00000009335.17	UBE3C	4.79926916383353	-0.0877027	0.0182742	1.98657e-06	0.00011518	0.00376655
rs4688760	Pancreas	ENSG00000186792.16	HYAL3	-4.86925677866264	-0.332722	0.0683312	1.98776e-06	0.000332653	0.478471
rs7124681	Muscle_Skeletal	ENSG00000165915.13	SLC39A13	4.79911479942765	0.122811	0.0255903	1.98805e-06	0.000800017	0.0540629
rs7078559	Liver	ENSG00000198060.9	MARCH5	-4.92672608930548	-0.306702	0.0622527	1.98962e-06	7.87684e-05	0.0327983
rs2727301	Pituitary	ENSG00000087191.12	PSMC5	4.89985679297916	-0.236927	0.0483539	1.99723e-06	8.76934e-05	0.0113045
rs1641523	Pituitary	ENSG00000129214.14	SHBG	4.89507137396448	-0.380249	0.0776799	2.04103e-06	3.97303e-05	0.110937
rs13085136	Pancreas	ENSG00000163602.10	RYBP	4.86311584227817	-0.431245	0.0886766	2.04495e-06	5.3045e-05	0.960844
rs340874	Small_Intestine_Terminal_Ileum	ENSG00000274895.1	RP11-478J18.2	4.95971459545524	0.412852	0.0832411	2.1002e-06	3.73712e-05	1
rs4688760	Stomach	ENSG00000182179.12	UBA7	-4.84542399566256	-0.152243	0.0314199	2.13672e-06	0.000304329	0.923249
rs1260326	Small_Intestine_Terminal_Ileum	ENSG00000115216.13	NRBP1	-4.95118902902181	-0.213952	0.0432122	2.17945e-06	7.33991e-05	0.97988
rs4688760	Colon_Transverse	ENSG00000182179.12	UBA7	-4.82865794775319	-0.180799	0.037443	2.20069e-06	0.000471217	0.762461
rs56376556	Muscle_Skeletal	ENSG00000170667.14	RASA4B	-4.77613682210575	-0.431073	0.0902556	2.22025e-06	0.000260042	0.749423
rs12719778	Adipose_Subcutaneous	ENSG00000255182.2	CTD-2517M22.14	4.7836450907542	-0.195885	0.0409489	2.25577e-06	0.000202275	0.641366
rs78403475	Muscle_Skeletal	ENSG00000160360.12	GPSM1	-4.76444182445482	0.227957	0.0478454	2.34825e-06	8.77995e-05	0.232937
rs4148856	Muscle_Skeletal	ENSG00000051825.14	MPHOSPH9	-4.76361209713188	-0.153738	0.0322735	2.3576e-06	0.000317024	0.00900224
rs13737	Liver	ENSG00000260274.1	RP11-817O13.8	4.88810647955876	-0.352233	0.0720592	2.36326e-06	8.54221e-05	0.00213529
rs3768321	Pituitary	ENSG00000090621.13	PABPC4	-4.86250514873121	-0.207973	0.0427708	2.36482e-06	6.65248e-05	0.423971
rs12910825	Whole_Blood	ENSG00000166965.12	RCCD1	4.76503186896982	0.121805	0.0255622	2.37132e-06	0.000104866	0.944014
rs362307	Thyroid	ENSG00000159788.18	RGS12	4.77151512940335	0.262445	0.0550025	2.39846e-06	0.000139024	1
rs2727301	Whole_Blood	ENSG00000266173.6	STRADA	4.76172210372954	-0.081858	0.0171908	2.40911e-06	0.000209338	0.00429845
rs80147536	Adipose_Visceral_Omentum	ENSG00000234936.1	AC010883.5	4.78407328106887	-0.426532	0.0891567	2.42211e-06	0.000125253	0.118857
rs8046545	Adipose_Visceral_Omentum	ENSG00000184110.14	EIF3C	-4.78186028674427	0.24663	0.0515762	2.44747e-06	0.000147912	0.305522
rs9430095	Small_Intestine_Terminal_Ileum	ENSG00000261000.1	RP11-534L20.5	-4.92259778843516	-0.350196	0.0711404	2.46701e-06	4.64739e-05	0.424564
rs6518681	Colon_Transverse	ENSG00000100296.13	THOC5	-4.80223995144564	-0.278482	0.05799	2.48805e-06	0.000156277
rs61676547	Adipose_Visceral_Omentum	ENSG00000277476.1	RP11-147L13.13	4.77753648718192	0.197543	0.0413483	2.49775e-06	8.93584e-05	0.0364482
rs1260326	Muscle_Skeletal	ENSG00000198522.13	GPN1	-4.74857432676685	-0.120199	0.0253127	2.53332e-06	0.000318556	0.105903
rs145678014	Colon_Transverse	ENSG00000149100.12	EIF3M	4.79830004023319	-0.289392	0.0603113	2.53389e-06	0.000121123	0.494103
rs12640250	Pituitary	ENSG00000163257.10	DCAF16	-4.84531804768535	-0.199228	0.0411176	2.55519e-06	7.47018e-05	0.42985
rs11642430	Liver	ENSG00000169592.14	INO80E	-4.86714434042773	-0.263062	0.0540486	2.59366e-06	7.36305e-05	0.0333334
rs8107974	Adipose_Subcutaneous	ENSG00000105726.16	ATP13A1	4.75178669513786	0.19875	0.0418265	2.62433e-06	0.000238309	0.0928598
rs2767036	Muscle_Skeletal	ENSG00000149089.12	APIP	4.74094048048095	-0.163135	0.0344098	2.62727e-06	0.000156746	0.00342298
rs34855406	Colon_Transverse	ENSG00000108784.9	NAGLU	-4.79031939973348	-0.146122	0.0305035	2.62926e-06	0.000177136	0.0646802
rs601945	Stomach	ENSG00000179344.16	HLA-DQB1	-4.78736381308038	-0.426895	0.0891713	2.79253e-06	8.64162e-05	0.139223
rs12910825	Adipose_Subcutaneous	ENSG00000258725.1	PRC1-AS1	-4.73832355854428	-0.230527	0.0486516	2.79693e-06	0.00014988	0.662302
rs10195252	Adipose_Subcutaneous	ENSG00000169507.9	SLC38A11	4.73283983862484	-0.225878	0.0477256	2.87032e-06	0.000294037	0.0443574
rs1260326	Muscle_Skeletal	ENSG00000157992.12	KRTCAP3	4.71948808992384	0.189503	0.0401532	2.90961e-06	0.000322789	0.79669
rs59944054	Adipose_Subcutaneous	ENSG00000171700.13	RGS19	-4.72945079137307	-0.143891	0.0304244	2.91659e-06	0.000225622	0.0508331
rs6884702	Pituitary	ENSG00000272335.1	RP11-53O19.3	-4.81540353475359	-0.243617	0.0505912	2.92245e-06	0.000147429	9.26733e-05
rs28638142	Stomach	ENSG00000135124.14	P2RX4	4.77646891638226	0.450363	0.0942878	2.93556e-06	8.83706e-05	0.968633
rs2727301	Whole_Blood	ENSG00000198231.12	DDX42	-4.71556557217403	0.105295	0.0223292	3.00044e-06	0.000207367	0.00802922
rs231361	Thyroid	ENSG00000269821.1	KCNQ1OT1	4.71780759656357	0.14592	0.0309295	3.09181e-06	0.00010494
rs8037894	Stomach	ENSG00000129003.15	VPS13C	-4.76270701685343	0.190756	0.0400521	3.12636e-06	5.19883e-05	0.0773827
rs4736819	Pancreas	ENSG00000165066.12	NKX6-3	-4.76963089067738	-0.329544	0.0690921	3.13858e-06	8.70735e-05	0.616033
rs13737	Thyroid	ENSG00000140398.13	NEIL1	4.71437502189794	-0.0992233	0.021047	3.14214e-06	0.000423281	0.000935348
rs116913033	Thyroid	ENSG00000015676.17	NUDCD3	4.71207573431153	-0.281411	0.0597213	3.17629e-06	0.000260423	0.367228
rs12719778	Muscle_Skeletal	ENSG00000254533.1	AF186192.1	-4.69979731324733	0.19893	0.0423274	3.19427e-06	0.000257367	0.717825
rs4925109	Muscle_Skeletal	ENSG00000171962.17	DRC3	-4.69947550872366	0.2077	0.0441963	3.19914e-06	0.000265111	0.790747
rs11642430	Colon_Transverse	ENSG00000169203.16	NPIPB12	4.74732116332227	0.263288	0.0554604	3.20572e-06	0.000153303
rs1783541	Adipose_Subcutaneous	ENSG00000260233.3	SSSCA1-AS1	4.70313873347785	0.233836	0.0497192	3.30114e-06	0.000287532	0.0818374
rs75423501	Thyroid	ENSG00000178038.16	ALS2CL	4.70293778204074	0.280121	0.059563	3.31559e-06	0.000465206
rs61676547	Pituitary	ENSG00000278740.1	RP11-147L13.14	4.78673000463294	0.47533	0.0993016	3.32205e-06	6.71407e-05	0.0391721
rs5758223	Thyroid	ENSG00000100147.13	CCDC134	4.69952789689315	0.187634	0.0399261	3.36905e-06	0.000387531
rs1641523	Muscle_Skeletal	ENSG00000141504.11	SAT2	4.68351804864623	-0.121025	0.0258407	3.44965e-06	0.000120454	0.0325484
rs7124681	Whole_Blood	ENSG00000134575.9	ACP2	4.68592849540018	0.125713	0.0268278	3.45125e-06	0.000540797	0.0726252
rs34855406	Adipose_Subcutaneous	ENSG00000108786.10	HSD17B1	-4.69085977034755	-0.202642	0.0431994	3.49686e-06	0.00033366	0.0682556
rs11496066	Pituitary	ENSG00000228049.7	POLR2J2	-4.77067503080716	0.558027	0.11697	3.56835e-06	9.45525e-05	0.0461714
rs3751837	Stomach	ENSG00000167984.17	NLRC3	-4.7308196544066	-0.208516	0.0440761	3.61553e-06	4.44608e-05	0.998168
rs2233632	Stomach	ENSG00000065060.16	UHRF1BP1	-4.72672794023437	-0.250453	0.0529865	3.6834e-06	8.9922e-05	0.476664
rs1641523	Pancreas	ENSG00000141504.11	SAT2	4.73392198694635	-0.20617	0.0435516	3.69041e-06	5.71055e-05	0.027797
rs11496066	Stomach	ENSG00000267368.1	UPK3BL	-4.72488888234516	0.429437	0.0908884	3.71431e-06	0.000106066	0.0102184
rs3751837	Pituitary	ENSG00000276754.1	RP11-461A8.5	-4.75982921217738	-0.410304	0.0862014	3.74462e-06	5.01949e-05	0.925877
rs3887925	Pancreas	ENSG00000073849.14	ST6GAL1	4.7292768438554	0.229039	0.0484301	3.76873e-06	5.00994e-05	0.991506
rs11699802	Thyroid	ENSG00000231742.5	LINC01273	4.6728290067091	-0.21518	0.0460492	3.81735e-06	0.000143676	0.0329514
rs62059712	Adipose_Subcutaneous	ENSG00000108947.4	EFNB3	4.67034464081136	-0.401002	0.0858613	3.849e-06	0.000123997
rs601945	Pituitary	ENSG00000232629.8	HLA-DQB2	4.74862810271288	0.528399	0.111274	3.93548e-06	7.16885e-05	0.438536
rs6063048	Thyroid	ENSG00000064655.18	EYA2	-4.66480258786735	0.24304	0.0521007	3.96297e-06	0.000165364	0.0810595
rs2268382	Adipose_Visceral_Omentum	ENSG00000266265.2	KLF14	-4.67690652336513	-0.154995	0.0331405	3.9926e-06	9.38176e-05	0.106279
rs1783541	Colon_Transverse	ENSG00000172803.17	SNX32	4.69516516278535	0.313901	0.0668562	4.06942e-06	0.000179307	0.0382768
rs12802972	Liver	ENSG00000227306.1	AP006285.6	-4.76351061526239	-0.33127	0.0695432	4.09165e-06	2.79654e-05	0.023918
rs60276348	Adipose_Subcutaneous	ENSG00000224383.7	PRR29	4.6538098026098	0.228096	0.0490127	4.1574e-06	0.000251304	0.308495
rs58730668	Adipose_Subcutaneous	ENSG00000151725.11	CENPU	-4.64897976434719	0.248177	0.0533831	4.25187e-06	9.99893e-05	0.0303652
rs1796330	Small_Intestine_Terminal_Ileum	ENSG00000258053.1	CTD-2021H9.3	-4.79489414770573	0.212577	0.044334	4.26756e-06	5.42822e-05	0.4506
rs11257655	Pituitary	ENSG00000065665.20	SEC61A2	-4.72088980656909	-0.284147	0.0601894	4.44944e-06	4.1205e-05	0.999997
rs2233632	Colon_Sigmoid	ENSG00000065060.16	UHRF1BP1	-4.68397648978227	-0.29632	0.0632625	4.51517e-06	0.000127904	0.00207694
rs12680028	Thyroid	ENSG00000205038.11	PKHD1L1	4.63594107642197	-0.207192	0.0446925	4.53202e-06	0.000395805	0.0881709
rs11688682	Small_Intestine_Terminal_Ileum	ENSG00000163083.5	INHBB	-4.78005795798721	0.376851	0.0788381	4.54542e-06	3.76933e-05
rs7978610	Muscle_Skeletal	ENSG00000119242.8	CCDC92	4.62185192701011	-0.0985641	0.0213257	4.60689e-06	0.000145093	0.000939154
rs35654957	Whole_Blood	ENSG00000163945.15	UVSSA	4.62309107739284	0.124122	0.0268482	4.63216e-06	0.000143221	1
rs8046545	Stomach	ENSG00000251417.2	RP11-1348G14.4	4.67428941415361	-0.313801	0.0671334	4.66969e-06	8.20219e-05	0.139007
rs12802972	Pancreas	ENSG00000205866.3	FAM99A	-4.68028018713555	-0.31934	0.0682309	4.69876e-06	4.32482e-05	0.0122289
rs34855406	Pancreas	ENSG00000141699.10	FAM134C	4.67449647408247	0.170282	0.0364278	4.82214e-06	0.00013311	0.0234642
rs78403475	Adipose_Visceral_Omentum	ENSG00000160360.12	GPSM1	-4.62727531835479	0.223287	0.0482545	5.01665e-06	5.12579e-05	0.445272
rs57327348	Adipose_Subcutaneous	ENSG00000269918.1	AF131215.9	-4.60985018386728	0.252201	0.0547092	5.09714e-06	0.000128594	0.718808
rs4148856	Whole_Blood	ENSG00000182196.13	ARL6IP4	4.60171126044304	0.0784858	0.0170558	5.11603e-06	0.000239894	6.33437e-06
rs8046545	Pancreas	ENSG00000178188.14	SH2B1	4.65985016679177	-0.168829	0.0362306	5.14871e-06	8.96553e-05	0.280379
rs2280141	Adipose_Visceral_Omentum	ENSG00000138152.8	BTBD16	4.61469888769068	-0.257296	0.0557557	5.31376e-06	8.42021e-05	0.339036
rs601945	Adipose_Subcutaneous	ENSG00000204314.10	PRRT1	4.59841966955401	0.155087	0.0337262	5.37309e-06	0.000253635	0.64026
rs2767036	Colon_Sigmoid	ENSG00000110435.11	PDHX	-4.6436890836897	0.203518	0.0438267	5.41032e-06	7.5975e-05	0.0450473
rs7124681	Muscle_Skeletal	ENSG00000109920.12	FNBP4	4.58162236040531	0.107531	0.02347	5.55388e-06	0.000675898	0.111103
rs12578639	Thyroid	ENSG00000111445.13	RFC5	4.58457186576631	-0.186514	0.0406829	5.74449e-06	0.000157462	0.132963
rs3111316	Small_Intestine_Terminal_Ileum	ENSG00000105607.12	GCDH	-4.72206736238189	-0.258822	0.0548111	5.80937e-06	3.86991e-05	0.272889
rs12910825	Small_Intestine_Terminal_Ileum	ENSG00000196547.14	MAN2A2	-4.71779289064059	-0.221291	0.0469057	5.91494e-06	3.2582e-05	0.901242
rs6884702	Adipose_Visceral_Omentum	ENSG00000272335.1	RP11-53O19.3	-4.59097966389477	-0.126134	0.0274744	5.92077e-06	0.000314552	2.9823e-05
rs3751837	Pancreas	ENSG00000213918.10	DNASE1	-4.62603953425925	-0.232184	0.0501907	5.98596e-06	5.09866e-05	0.999952
rs6600191	Colon_Transverse	ENSG00000076344.15	RGS11	4.60870297493719	-0.192323	0.0417304	6.01588e-06	6.57661e-05	0.408349
rs2268078	Colon_Sigmoid	ENSG00000101460.12	MAP1LC3A	4.61879570440071	0.164887	0.0356991	6.04639e-06	0.000222185
rs11688682	Adipose_Subcutaneous	ENSG00000237614.1	AC073257.2	-4.57163962590955	0.229209	0.0501372	6.07689e-06	0.000129454
rs1260326	Thyroid	ENSG00000221843.4	C2orf16	4.56907654744969	0.133837	0.029292	6.16764e-06	0.000377864	0.835636
rs61676547	Adipose_Visceral_Omentum	ENSG00000267731.1	RP11-147L13.8	4.57781097308464	0.194736	0.0425392	6.28597e-06	9.47281e-05	0.0140147
rs4148856	Thyroid	ENSG00000130921.7	C12orf65	4.56189557954397	0.167796	0.036782	6.37374e-06	0.000390136	0.00038084
rs7078559	Colon_Transverse	ENSG00000228701.1	TNKS2-AS1	-4.59075724078237	-0.331155	0.0721351	6.51963e-06	0.000158797	0.0380646
rs2767036	Small_Intestine_Terminal_Ileum	ENSG00000149089.12	APIP	4.69235742545514	-0.463202	0.0987142	6.58259e-06	3.96788e-05	0.0395253
rs1708302	Colon_Sigmoid	ENSG00000153814.11	JAZF1	4.59776655540174	-0.145018	0.0315409	6.63926e-06	7.01453e-05	0.222392
rs7222481	Colon_Transverse	ENSG00000109047.7	RCVRN	-4.58585296129673	-0.282082	0.0615113	6.6642e-06	4.72793e-05	0.0179376
rs718314	Adipose_Visceral_Omentum	ENSG00000123096.11	SSPN	4.56469760720172	0.118545	0.0259701	6.67109e-06	0.000120671	0.00378242
rs1903002	Adipose_Subcutaneous	ENSG00000138640.14	FAM13A	4.54693527547895	0.140705	0.030945	6.80396e-06	0.000194594
rs76895963	Pituitary	ENSG00000255920.1	CCND2-AS2	4.62105302111449	-0.952174	0.206051	6.89121e-06	3.50629e-05
rs7124681	Stomach	ENSG00000172247.3	C1QTNF4	-4.58672123735583	-0.187203	0.0408142	6.90822e-06	0.00025491	0.113524
rs3768321	Adipose_Subcutaneous	ENSG00000228060.1	RP11-69E11.8	-4.54350726018897	-0.267159	0.0588002	6.91122e-06	0.000170625	0.815159
rs4932265	Whole_Blood	ENSG00000166825.13	ANPEP	-4.53597918586254	0.143777	0.0316971	6.92665e-06	0.000117689	0.00547691
rs8046545	Colon_Transverse	ENSG00000184110.14	EIF3C	-4.57678081452076	0.2551	0.0557378	6.93981e-06	0.00011369	0.380175
rs77464186	Thyroid	ENSG00000186642.15	PDE2A	-4.5405112811821	0.20432	0.0449993	7.02736e-06	0.000308419	0.496077
rs362307	Adipose_Visceral_Omentum	ENSG00000159788.18	RGS12	4.55312996699579	0.278235	0.0611084	7.02954e-06	8.7457e-05	1
rs12920022	Pancreas	ENSG00000167526.13	RPL13	-4.58875585813962	-0.179139	0.0390388	7.061e-06	8.03078e-05
rs1061810	Muscle_Skeletal	ENSG00000246250.2	RP11-613D13.5	-4.5270103725933	-0.196946	0.0435046	7.14225e-06	0.000166499	0.0427734
rs1783541	Thyroid	ENSG00000245532.7	NEAT1	4.53115881137464	0.16294	0.0359598	7.33301e-06	0.000406572	0.208524
rs4776970	Colon_Sigmoid	ENSG00000188779.10	SKOR1	-4.57345897778125	0.17971	0.0392941	7.39431e-06	8.40579e-05	0.892919
rs2727301	Muscle_Skeletal	ENSG00000198909.7	MAP3K3	4.51832527851703	-0.117616	0.0260309	7.43197e-06	0.000228085	1.58953e-06
rs4977213	Adipose_Subcutaneous	ENSG00000071894.16	CPSF1	-4.52587923591916	0.251303	0.0555257	7.48889e-06	0.000203486	0.00846092
rs58730668	Whole_Blood	ENSG00000164305.18	CASP3	-4.51866656293537	0.115871	0.0256427	7.49743e-06	7.37882e-05	0.039335
rs2268078	Adipose_Visceral_Omentum	ENSG00000101460.12	MAP1LC3A	4.53524130639724	0.132099	0.0291272	7.6205e-06	0.00030263
rs8046545	Whole_Blood	ENSG00000178188.14	SH2B1	4.51173855712795	-0.0782922	0.017353	7.73825e-06	0.000213806	0.0508005
rs4281707	Whole_Blood	ENSG00000261804.1	RP11-44F14.2	-4.51166688997851	0.190118	0.0421391	7.74078e-06	0.000112817	0.0243064
rs13737	Pancreas	ENSG00000177971.8	IMP3	-4.56454756711362	0.191754	0.0420093	7.85605e-06	0.000140451	0.324817
rs115505614	Whole_Blood	ENSG00000145725.19	PPIP5K2	-4.504113427889	-0.178798	0.0396966	8.01186e-06	0.00024867	0.182844
rs11070332	Adipose_Visceral_Omentum	ENSG00000243708.10	PLA2G4B	4.52234584600247	0.0870486	0.0192486	8.07578e-06	0.000210179	0.362355
rs11699802	Adipose_Subcutaneous	ENSG00000277449.1	CEBPB-AS1	4.50654326383253	-0.112394	0.0249402	8.17572e-06	0.000155098	0.280929
rs601945	Small_Intestine_Terminal_Ileum	ENSG00000204525.16	HLA-C	-4.63933354159408	-0.374494	0.0807214	8.21675e-06	0.000100217
rs7124681	Small_Intestine_Terminal_Ileum	ENSG00000165916.8	PSMC3	4.63912046007583	0.155021	0.033416	8.22405e-06	0.000182493	0.148786
rs576123	Small_Intestine_Terminal_Ileum	ENSG00000175164.13	ABO	-4.63882912593309	0.176021	0.037945	8.23404e-06	2.32874e-05
rs58730668	Thyroid	ENSG00000164306.10	PRIMPOL	4.50542940109514	-0.228979	0.050823	8.24108e-06	0.000128248	0.038265
rs12719778	Colon_Transverse	ENSG00000197363.9	ZNF517	4.53803490776899	-0.11598	0.0255574	8.24518e-06	0.000159639	0.715945
rs11926707	Muscle_Skeletal	ENSG00000188086.13	PRSS45	-4.49428937846818	-0.146187	0.0325274	8.29369e-06	0.000381734	1
rs1421085	Pancreas	ENSG00000177508.11	IRX3	4.55163434971329	0.365211	0.0802374	8.31466e-06	4.54538e-05
rs1783541	Thyroid	ENSG00000172922.8	RNASEH2C	-4.5033280107357	-0.144293	0.0320414	8.31983e-06	0.00041027	0.0943053
rs7978610	Whole_Blood	ENSG00000179195.15	ZNF664	-4.49437171172499	0.0760379	0.0169185	8.37494e-06	0.00013113	0.00326514
rs601945	Muscle_Skeletal	ENSG00000196735.11	HLA-DQA1	-4.48967971083332	-0.230222	0.051278	8.46954e-06	0.000293476	0.278999
rs6600191	Adipose_Visceral_Omentum	ENSG00000076344.15	RGS11	4.51023998005781	-0.194717	0.0431723	8.52685e-06	8.49274e-05	0.137452
rs35895680	Colon_Transverse	ENSG00000136436.14	CALCOCO2	4.53027105582708	-0.17198	0.0379625	8.53373e-06	0.000126465
rs8046545	Colon_Transverse	ENSG00000196502.11	SULT1A1	4.52430013730894	-0.149785	0.0331068	8.76221e-06	0.000124167	0.0583663
rs12680028	Muscle_Skeletal	ENSG00000120526.10	NUDCD1	4.47777381668029	-0.123645	0.027613	8.94042e-06	0.000303868	0.0892265
rs5758223	Stomach	ENSG00000235513.1	RP4-756G23.5	4.52790542059968	0.283817	0.0626818	8.95766e-06	0.000175807	0.151708
rs55653563	Muscle_Skeletal	ENSG00000148110.15	MFSD14B	4.47400247538281	-0.192887	0.0431128	9.09473e-06	0.000290059	0.508461
rs62007683	Colon_Transverse	ENSG00000126215.13	XRCC3	-4.51574590611305	0.165501	0.0366498	9.0998e-06	7.85827e-05	0.00604299
rs72802342	Adipose_Subcutaneous	ENSG00000153774.8	CFDP1	4.48082731672413	-0.174617	0.0389697	9.18323e-06	0.000185423	0.000274491
rs55653563	Thyroid	ENSG00000158079.14	PTPDC1	4.47678922511975	-0.142317	0.0317899	9.37855e-06	0.000298804	0.758914
rs12910825	Colon_Transverse	ENSG00000166965.12	RCCD1	4.50516572135929	0.145977	0.032402	9.53465e-06	6.97679e-05	0.654015
rs34855406	Colon_Sigmoid	ENSG00000068120.14	COASY	4.51370976646146	0.173399	0.0384161	9.61748e-06	0.000183015	0.398012
rs4148856	Stomach	ENSG00000182196.13	ARL6IP4	4.5115196399535	0.18165	0.0402635	9.62556e-06	0.000144836	0.147992
rs7124681	Thyroid	ENSG00000165916.8	PSMC3	4.46911110098954	0.0736225	0.0164736	9.70819e-06	0.000905994	0.222012
rs1783541	Thyroid	ENSG00000172803.17	SNX32	4.46751426650174	0.307459	0.0688211	9.77813e-06	0.000460756	0.102288
rs4923543	Stomach	ENSG00000169519.20	METTL15	-4.50766204784549	-0.209357	0.0464447	9.78962e-06	0.000147359	0.873203
rs61881115	Adipose_Subcutaneous	ENSG00000172927.7	MYEOV	4.46556169801376	-0.20276	0.0454054	9.8365e-06	0.000124967	0.146264
rs61676547	Thyroid	ENSG00000277476.1	RP11-147L13.13	4.46610894670065	0.160791	0.0360026	9.84007e-06	0.000180736	0.583715
rs5213	Colon_Transverse	ENSG00000260196.1	RP1-239B22.5	4.49796131974313	-0.121378	0.026985	9.8421e-06	9.61229e-05
rs8046545	Colon_Sigmoid	ENSG00000178188.14	SH2B1	4.50715915152448	-0.122628	0.0272074	9.89707e-06	0.000126774	0.127279
rs6600191	Colon_Sigmoid	ENSG00000076344.15	RGS11	4.49639916582633	-0.211009	0.0469285	1.03734e-05	7.5459e-05	0.383872
rs8037894	Adipose_Subcutaneous	ENSG00000129003.15	VPS13C	-4.45315676479268	0.0959178	0.0215393	1.03999e-05	0.000133241	0.0807997
rs348330	Stomach	ENSG00000069248.11	NUP133	4.49139287043511	-0.142904	0.0318174	1.05116e-05	5.18425e-05	1
rs8046545	Muscle_Skeletal	ENSG00000176953.12	NFATC2IP	-4.44157289450916	0.126617	0.0285072	1.05312e-05	0.000313354	0.220848
rs3768321	Pituitary	ENSG00000226438.1	RP11-420K8.1	4.52043647526134	0.405143	0.0896247	1.06358e-05	6.65163e-05
rs8046545	Muscle_Skeletal	ENSG00000178952.10	TUFM	-4.43909882365635	0.0868078	0.0195553	1.06493e-05	0.000236446	0.000585663
rs8046545	Colon_Transverse	ENSG00000197165.10	SULT1A2	-4.47985844867002	0.116277	0.0259555	1.06572e-05	0.000118199	0.0280888
rs8046545	Pancreas	ENSG00000176476.8	SGF29	4.49432390596838	-0.173246	0.0385477	1.06796e-05	0.000102656	0.105503
rs60276348	Thyroid	ENSG00000108622.10	ICAM2	4.44627325339932	0.212802	0.0478607	1.07556e-05	0.000350764	0.313927
rs8037894	Whole_Blood	ENSG00000129003.15	VPS13C	-4.43736449364138	0.0598156	0.01348	1.08369e-05	0.000121091	0.036115
rs12719778	Adipose_Visceral_Omentum	ENSG00000167700.8	MFSD3	4.45381744101764	-0.0925177	0.0207727	1.09677e-05	0.000130192	0.692295
rs61881115	Colon_Sigmoid	ENSG00000162341.16	TPCN2	4.48205697473272	-0.255825	0.0570776	1.10425e-05	7.68166e-05	0.277827
rs12719778	Adipose_Visceral_Omentum	ENSG00000196378.11	ZNF34	-4.45177069661874	0.14995	0.0336833	1.10678e-05	0.000185123	0.0863555
rs7178762	Pituitary	ENSG00000259248.5	USP3-AS1	4.50818970327542	-0.245718	0.0545049	1.12074e-05	7.31252e-05	0.617254
rs12001437	Muscle_Skeletal	ENSG00000137073.21	UBAP2	-4.42682403954305	-0.112871	0.025497	1.12541e-05	0.000262129	1
rs5213	Colon_Transverse	ENSG00000070081.15	NUCB2	4.46708217752628	-0.159145	0.0356263	1.12711e-05	0.000125382
rs2727301	Colon_Transverse	ENSG00000198231.12	DDX42	-4.46699318735381	0.143119	0.0320393	1.12755e-05	0.000133404	0.00122468
rs11759026	Adipose_Subcutaneous	ENSG00000203760.8	CENPW	-4.43053843176689	-0.196345	0.0443164	1.15077e-05	0.00031512	1
rs7978610	Whole_Blood	ENSG00000119242.8	CCDC92	4.41864503022393	-0.0983359	0.0222548	1.17866e-05	0.000123705	0.00305912
rs62059712	Pancreas	ENSG00000108947.4	EFNB3	4.47070774892615	-0.659516	0.147519	1.18315e-05	5.12404e-05
rs1580278	Adipose_Visceral_Omentum	ENSG00000145354.9	CISD2	-4.43543173460333	0.127039	0.0286418	1.18986e-05	0.000165394	0.999695
rs2727301	Stomach	ENSG00000198909.7	MAP3K3	4.46189768206365	-0.140396	0.0314655	1.19527e-05	8.503e-05	1.99056e-05
rs61881115	Colon_Sigmoid	ENSG00000261070.1	RP11-554A11.8	4.46374689555415	-0.437133	0.0979297	1.19572e-05	7.06407e-05	0.132554
rs7124681	Pancreas	ENSG00000172247.3	C1QTNF4	-4.46495256381895	-0.312489	0.0699871	1.21298e-05	0.000291555	0.105697
rs55653563	Adipose_Subcutaneous	ENSG00000232063.1	RP11-307E17.8	-4.41355977296391	0.225802	0.051161	1.24125e-05	0.000290498	0.398292
rs61676547	Adipose_Subcutaneous	ENSG00000278740.1	RP11-147L13.14	4.41291698198855	0.259646	0.0588378	1.24481e-05	0.000150308	0.000277428
rs8107974	Whole_Blood	ENSG00000167491.17	GATAD2A	4.40633435775149	0.147037	0.0333695	1.24541e-05	0.00018602	0.17128
rs2727301	Pancreas	ENSG00000198909.7	MAP3K3	4.45252775383208	-0.222167	0.0498968	1.27987e-05	0.00010272	0.00564034
rs34584161	Colon_Sigmoid	ENSG00000132964.11	CDK8	4.44785032663434	-0.181058	0.0407068	1.281e-05	6.8818e-05	0.651234
rs12719778	Colon_Sigmoid	ENSG00000255182.2	CTD-2517M22.14	4.44567385830861	-0.175088	0.0393838	1.29311e-05	0.000103835	0.146582
rs474513	Liver	ENSG00000198670.11	LPA	-4.49439199456456	0.292926	0.0651759	1.29465e-05	3.5547e-05	0.0671918
rs55653563	Adipose_Visceral_Omentum	ENSG00000232063.1	RP11-307E17.8	-4.41353684745274	0.262735	0.0595293	1.3106e-05	0.000192074	0.200284
rs1260326	Whole_Blood	ENSG00000157992.12	KRTCAP3	4.39390835928588	0.159749	0.036357	1.31644e-05	0.000258614	0.393838
rs2268078	Colon_Transverse	ENSG00000101460.12	MAP1LC3A	4.42920082245501	0.143638	0.0324297	1.3297e-05	0.00026627
rs1800574	Stomach	ENSG00000241388.4	HNF1A-AS1	4.43666160561984	0.45808	0.103249	1.33346e-05	9.12155e-05
rs3774723	Liver	ENSG00000280620.1	SCAANT1	4.48660496576324	-0.514425	0.114658	1.33759e-05	3.30311e-05	0.00836641
rs4688760	Thyroid	ENSG00000164068.15	RNF123	4.39712121552688	0.129218	0.0293868	1.33889e-05	0.00115087	0.952018
rs28525376	Small_Intestine_Terminal_Ileum	ENSG00000224739.2	AC016735.1	4.52105270150467	-0.295844	0.0654369	1.33954e-05	5.82703e-05	0.204223
rs10406327	Adipose_Subcutaneous	ENSG00000124302.12	CHST8	-4.39638208799393	0.235648	0.0536004	1.33971e-05	0.000144996	0.945918
rs62007683	Stomach	ENSG00000166166.12	TRMT61A	4.43259891405589	-0.130947	0.0295417	1.3571e-05	5.09549e-05	0.0200841
rs8046545	Adipose_Visceral_Omentum	ENSG00000196993.8	NPIPB9	4.40216750342332	-0.292493	0.066443	1.37784e-05	0.000120871	0.0110865
rs75423501	Whole_Blood	ENSG00000164048.13	ZNF589	-4.38315172650659	-0.235764	0.0537886	1.38104e-05	0.000619455
rs62007683	Muscle_Skeletal	ENSG00000166165.12	CKB	4.38086427132544	-0.143989	0.0328678	1.38239e-05	0.000180698	0.0323891
rs1005752	Thyroid	ENSG00000140391.14	TSPAN3	4.38872377631233	0.0920479	0.0209737	1.38965e-05	0.000405031	0.0223208
rs362307	Adipose_Subcutaneous	ENSG00000188981.10	MSANTD1	4.38488618610881	0.384168	0.0876118	1.40973e-05	0.00012213	1
rs601945	Adipose_Visceral_Omentum	ENSG00000241106.6	HLA-DOB	4.39686857180875	0.341939	0.0777687	1.4103e-05	0.000156081	0.443539
rs28505901	Thyroid	ENSG00000165688.11	PMPCA	-4.38444566464528	0.127365	0.0290493	1.41621e-05	0.000101207	0.0893059
rs362307	Thyroid	ENSG00000188981.10	MSANTD1	4.37733157340516	0.31268	0.0714316	1.46146e-05	0.000145372	1
rs4977213	Whole_Blood	ENSG00000071894.16	CPSF1	-4.37035189681828	0.131624	0.0301175	1.46187e-05	0.000175738	0.0459697
rs116913033	Whole_Blood	ENSG00000015676.17	NUDCD3	4.36825254045762	-0.131921	0.0301999	1.47555e-05	0.000161254	0.313875
rs4281707	Stomach	ENSG00000166971.16	AKTIP	-4.41287863886888	0.131456	0.0297891	1.47763e-05	4.31588e-05	0.0317168
rs12719778	Pancreas	ENSG00000161016.17	RPL8	4.41869384672912	-0.15454	0.0349742	1.48042e-05	0.000141875	0.0231883
rs58730668	Colon_Transverse	ENSG00000151725.11	CENPU	-4.40290749024231	0.164432	0.0373461	1.49038e-05	5.12676e-05	0.0354343
rs2238689	Colon_Transverse	ENSG00000010310.8	GIPR	-4.40178501430071	-0.115955	0.0263428	1.49764e-05	6.05002e-05
rs2307111	Small_Intestine_Terminal_Ileum	ENSG00000152359.14	POC5	4.48887488605008	-0.235656	0.0524977	1.52784e-05	4.08966e-05	0.0224078
rs4925109	Colon_Sigmoid	ENSG00000175662.17	TOM1L2	4.40683982816121	-0.152163	0.0345288	1.52878e-05	0.000113989	0.839929
rs6884702	Pancreas	ENSG00000272335.1	RP11-53O19.3	-4.40878689921791	-0.227239	0.0515423	1.54464e-05	0.00021962	0.0133028
rs11926707	Adipose_Visceral_Omentum	ENSG00000188086.13	PRSS45	-4.3758513095039	-0.22723	0.0519281	1.54638e-05	0.000235735	1
rs4688760	Muscle_Skeletal	ENSG00000186792.16	HYAL3	-4.35504325277048	-0.19539	0.0448652	1.55046e-05	0.000843055	0.831184
rs4925109	Adipose_Visceral_Omentum	ENSG00000197815.4	RP1-253P7.4	4.37489990213461	-0.157929	0.0360988	1.55283e-05	0.000150079	0.665239
rs4930091	Small_Intestine_Terminal_Ileum	ENSG00000064201.15	TSPAN32	-4.48487031699644	-0.292389	0.0651944	1.55299e-05	2.08502e-05	0.249952
rs2052261	Liver	ENSG00000011523.13	CEP68	4.4496918431811	0.280865	0.0631202	1.56049e-05	3.1332e-05	2.98364e-10
rs12719778	Whole_Blood	ENSG00000196378.11	ZNF34	-4.353035994119	0.127905	0.029383	1.57843e-05	0.000220405	0.122948
rs3768321	Colon_Sigmoid	ENSG00000090621.13	PABPC4	-4.39718254344666	-0.18272	0.0415538	1.59349e-05	9.00018e-05	0.170322
rs34855406	Thyroid	ENSG00000108786.10	HSD17B1	-4.35624573386382	-0.171971	0.0394768	1.60384e-05	0.00035924	0.145892
rs57235767	Colon_Transverse	ENSG00000166002.6	SMCO4	-4.385654882545	0.121483	0.0277002	1.60575e-05	0.000121566	0.760667
rs1260326	Thyroid	ENSG00000138085.16	ATRAID	4.35586230654362	0.0854202	0.0196104	1.60655e-05	0.000409766	0.974511
rs8107974	Thyroid	ENSG00000105726.16	ATP13A1	4.35153303872532	0.1791	0.041158	1.63743e-05	0.000302857	0.186258
rs59944054	Colon_Sigmoid	ENSG00000171700.13	RGS19	-4.39047832463325	-0.18511	0.0421617	1.63994e-05	8.90041e-05	0.0736809
rs34855406	Pancreas	ENSG00000131462.7	TUBG1	4.39366852064544	0.18438	0.041965	1.64781e-05	0.000135411	0.0677791
rs1531583	Colon_Sigmoid	ENSG00000185619.18	PCGF3	-4.38851983136106	-0.462688	0.105431	1.65376e-05	9.73861e-05	0.832106
rs62007683	Colon_Sigmoid	ENSG00000100711.13	ZFYVE21	-4.38797031292497	0.221733	0.050532	1.65765e-05	7.75159e-05	0.0404173
rs601945	Pancreas	ENSG00000196126.11	HLA-DRB1	-4.39125074040987	-0.259014	0.0589841	1.66491e-05	0.000108945	0.20128
rs2268078	Pancreas	ENSG00000101000.5	PROCR	4.38607144852856	0.321658	0.0733363	1.70212e-05	0.000232374
rs3751837	Whole_Blood	ENSG00000126602.10	TRAP1	4.32944825468629	0.107407	0.0248084	1.75158e-05	0.000106099	0.690348
rs11070332	Colon_Transverse	ENSG00000062524.15	LTK	-4.3646621159368	-0.128288	0.0293924	1.75769e-05	0.000152078	0.300108
rs57327348	Thyroid	ENSG00000269918.1	AF131215.9	-4.33504371905742	0.189094	0.0436198	1.76032e-05	0.000163249	0.796607
rs601945	Stomach	ENSG00000204528.3	PSORS1C3	4.37153082815649	0.349294	0.079902	1.76455e-05	0.000124559
rs12719778	Whole_Blood	ENSG00000167702.11	KIFC2	4.32657945578924	-0.0655288	0.0151456	1.77384e-05	0.000185661	0.646935
rs4977213	Muscle_Skeletal	ENSG00000071894.16	CPSF1	-4.32453638381538	0.161633	0.0373758	1.77423e-05	0.000194985	0.0705788
rs59944054	Colon_Transverse	ENSG00000125510.15	OPRL1	-4.36005988247356	-0.216978	0.0497649	1.79279e-05	9.92807e-05	0.0262643
rs35352848	Whole_Blood	ENSG00000182247.9	UBE2E2	-4.32117571855406	0.135408	0.031336	1.8165e-05	0.000192075	0.373499
rs7978610	Liver	ENSG00000119242.8	CCDC92	4.40912648602957	-0.291831	0.066188	1.84659e-05	2.97256e-05	0.000812944
rs4776970	Thyroid	ENSG00000245719.1	RP11-34F13.2	-4.32316512439821	0.199434	0.0461314	1.85426e-05	0.00024527	0.997693
rs1316776	Adipose_Subcutaneous	ENSG00000132837.14	DMGDH	4.31980625494052	-0.106171	0.0245776	1.87699e-05	0.000148411	0.0329253
rs5213	Colon_Transverse	ENSG00000188211.8	NCR3LG1	4.34720335507966	-0.105864	0.0243523	1.89444e-05	0.000120584
rs35654957	Whole_Blood	ENSG00000145214.13	DGKQ	-4.31036688504464	-0.154138	0.0357597	1.90478e-05	0.00013164	1
rs601945	Adipose_Subcutaneous	ENSG00000223534.1	HLA-DQB1-AS1	-4.3098972889886	-0.271998	0.06311	1.95999e-05	0.000251335	0.42344
rs11642430	Liver	ENSG00000090238.11	YPEL3	4.39213336968782	0.207531	0.0472505	1.98086e-05	8.13705e-05	0.0892267
rs12910825	Adipose_Visceral_Omentum	ENSG00000258725.1	PRC1-AS1	-4.31602755170597	-0.273363	0.0633368	2.00597e-05	7.53991e-05	0.93966
rs4148856	Whole_Blood	ENSG00000150967.17	ABCB9	-4.29812300348414	-0.131306	0.0305495	2.00973e-05	0.00028978	0.396423
rs12719778	Pituitary	ENSG00000167702.11	KIFC2	4.36854433234707	-0.220937	0.0505744	2.02073e-05	8.11304e-05	0.574428
rs6458354	Thyroid	ENSG00000112715.21	VEGFA	-4.30263818366878	0.138186	0.0321166	2.02799e-05	0.000167733	0.0641144
rs5213	Muscle_Skeletal	ENSG00000188211.8	NCR3LG1	-4.29251466148447	0.179578	0.0418352	2.04214e-05	0.000220883
rs3751837	Thyroid	ENSG00000276754.1	RP11-461A8.5	-4.30023157889137	-0.248021	0.0576762	2.04935e-05	0.000148721	0.760613
rs2268382	Thyroid	ENSG00000106477.18	CEP41	4.29950444124876	0.142778	0.0332079	2.05584e-05	0.000176963	0.0924222
rs4776970	Stomach	ENSG00000188779.10	SKOR1	-4.33289800928297	0.171036	0.0394739	2.0803e-05	6.52524e-05	0.38787
rs7022807	Colon_Sigmoid	ENSG00000178031.16	ADAMTSL1	-4.33402857791903	-0.170365	0.0393086	2.08604e-05	6.15913e-05
rs11496066	Adipose_Subcutaneous	ENSG00000168255.19	POLR2J3	-4.29524135286618	0.279401	0.065049	2.08921e-05	0.000238564	0.173095
rs2028150	Pituitary	ENSG00000281920.1	RP11-418H16.1	-4.35991170758326	0.324997	0.074542	2.09478e-05	4.99544e-05	0.26415
rs3774723	Colon_Sigmoid	ENSG00000163636.10	PSMD6	-4.33247816878962	0.122228	0.0282119	2.0998e-05	8.21621e-05	0.255645
rs11642430	Whole_Blood	ENSG00000102886.14	GDPD3	-4.28680986971463	-0.106841	0.0249231	2.1116e-05	0.000307454	0.0706119
rs601945	Whole_Blood	ENSG00000223534.1	HLA-DQB1-AS1	-4.28198524648249	-0.175183	0.0409117	2.15652e-05	0.000241312	0.28768
rs3768321	Adipose_Subcutaneous	ENSG00000183682.7	BMP8A	4.28792142057909	0.284259	0.0662929	2.15676e-05	0.000199125	0.0709031
rs601945	Muscle_Skeletal	ENSG00000213676.10	ATF6B	4.27993087302166	0.138331	0.0323207	2.15765e-05	0.00025489	0.403917
rs13065698	Stomach	ENSG00000114771.13	AADAC	-4.32301675645201	0.124425	0.0287821	2.16936e-05	7.46244e-05
rs62007683	Muscle_Skeletal	ENSG00000270108.1	RP11-73M18.6	4.27739482531683	-0.190365	0.0445049	2.18167e-05	0.000151318	0.0304107
rs1783541	Adipose_Subcutaneous	ENSG00000172922.8	RNASEH2C	-4.28437757028455	-0.139501	0.0325603	2.19021e-05	0.000337969	0.13887
rs7222481	Adipose_Subcutaneous	ENSG00000109047.7	RCVRN	-4.28355309784906	-0.220464	0.0514677	2.19806e-05	9.72048e-05	0.00450587
rs4925109	Pituitary	ENSG00000091536.16	MYO15A	-4.34800280320396	0.150061	0.0345126	2.20122e-05	7.92204e-05	0.719349
rs8046545	Colon_Sigmoid	ENSG00000184110.14	EIF3C	-4.31914439440993	0.271715	0.0629094	2.22177e-05	0.000105306	0.291085
rs34855406	Colon_Sigmoid	ENSG00000177469.12	PTRF	4.31828330855215	0.105871	0.0245169	2.22988e-05	0.000153866	0.201607
rs7978610	Stomach	ENSG00000250091.2	DNAH10OS	4.31159589968343	-0.206317	0.0478518	2.27685e-05	5.70881e-05	0.00974294
rs2268382	Adipose_Visceral_Omentum	ENSG00000270823.1	RP11-2E11.6	-4.28032028547641	-0.157241	0.0367359	2.33973e-05	9.46318e-05	0.106618
rs6600191	Thyroid	ENSG00000076344.15	RGS11	4.26836884546261	-0.146906	0.0344175	2.35317e-05	0.000156235	0.190474
rs601945	Pancreas	ENSG00000224389.8	C4B	-4.30881574140479	-0.254591	0.059086	2.36113e-05	0.0001122
rs12910825	Thyroid	ENSG00000196547.14	MAN2A2	-4.26261251653468	-0.090692	0.0212762	2.41245e-05	0.000156632	0.878356
rs34855406	Colon_Transverse	ENSG00000108786.10	HSD17B1	-4.28929526794726	-0.239488	0.055834	2.42475e-05	0.000166318	0.0690295
rs4148856	Colon_Transverse	ENSG00000051825.14	MPHOSPH9	-4.2889741208154	-0.185328	0.0432103	2.42805e-05	0.00014554	0.0128579
rs5758223	Whole_Blood	ENSG00000100395.14	L3MBTL2	4.25444124186011	0.0742872	0.0174611	2.43098e-05	0.000388195	0.0248915
rs5213	Muscle_Skeletal	ENSG00000006071.12	ABCC8	4.2524545652019	-0.193153	0.0454215	2.4319e-05	0.000215445
rs1316776	Colon_Sigmoid	ENSG00000132840.9	BHMT2	4.29713530206597	-0.279357	0.06501	2.43807e-05	9.97321e-05	0.0221929
rs61676547	Colon_Sigmoid	ENSG00000278730.1	RP11-147L13.11	4.29378681412948	0.237836	0.0553907	2.47269e-05	8.0112e-05	0.000832254
rs2727301	Pancreas	ENSG00000108588.13	CCDC47	4.29597740411239	-0.151329	0.0352257	2.49201e-05	0.00014467	0.00123718
rs6884702	Colon_Sigmoid	ENSG00000272335.1	RP11-53O19.3	-4.29027570579623	-0.161143	0.03756	2.5095e-05	0.000202369	0.00127857
rs56348580	Thyroid	ENSG00000122971.8	ACADS	-4.25135514755918	0.134726	0.0316902	2.53254e-05	0.000275949	0.639553
rs62007683	Liver	ENSG00000166165.12	CKB	4.33045567021746	-0.335268	0.0774209	2.5515e-05	3.6961e-05	0.0227637
rs7978610	Stomach	ENSG00000119242.8	CCDC92	4.28450121022828	-0.129276	0.030173	2.55261e-05	5.00346e-05	0.0305406
rs11257655	Thyroid	ENSG00000183049.12	CAMK1D	4.24311603192994	0.154768	0.036475	2.62402e-05	0.000118545	0.999996
rs62007683	Adipose_Visceral_Omentum	ENSG00000166166.12	TRMT61A	4.25187688198226	-0.10396	0.0244505	2.6429e-05	9.18577e-05	0.036879
rs4925109	Colon_Transverse	ENSG00000175662.17	TOM1L2	4.26618614105299	-0.100737	0.023613	2.67375e-05	0.000114816	0.800361
rs2233632	Thyroid	ENSG00000124562.9	SNRPC	4.23673841667221	0.0759509	0.0179267	2.69699e-05	0.000287788	0.484941
rs1316776	Thyroid	ENSG00000132840.9	BHMT2	4.23635831556493	-0.178681	0.0421781	2.7014e-05	0.000217246	0.0426011
rs13041756	Thyroid	ENSG00000088930.7	XRN2	4.23604851609193	0.118112	0.0278826	2.705e-05	0.00033327	0.435252
rs601945	Whole_Blood	ENSG00000240053.8	LY6G5B	-4.22612866481542	-0.100575	0.0237983	2.74765e-05	0.000256005
rs2872246	Whole_Blood	ENSG00000161202.17	DVL3	-4.22612224423834	0.0950814	0.0224985	2.74772e-05	0.000124932	0.178602
rs11699802	Adipose_Visceral_Omentum	ENSG00000231742.5	LINC01273	4.23918788191787	-0.216229	0.0510072	2.78992e-05	8.96016e-05	0.106804
rs4925109	Muscle_Skeletal	ENSG00000091542.8	ALKBH5	4.22016732255373	-0.0950983	0.0225342	2.79669e-05	0.000250955	0.481462
rs7978610	Adipose_Visceral_Omentum	ENSG00000197653.15	DNAH10	4.23840709189702	-0.232108	0.054763	2.79922e-05	0.00012812	9.64947e-11
rs28819812	Adipose_Subcutaneous	ENSG00000145431.10	PDGFC	4.22717680498729	-0.1238	0.0292867	2.80357e-05	0.000243605	0.00203847
rs8046545	Adipose_Subcutaneous	ENSG00000176953.12	NFATC2IP	-4.22690485657525	0.13196	0.0312191	2.80684e-05	0.000290749	0.224315
rs11496066	Muscle_Skeletal	ENSG00000105808.17	RASA4	-4.2189645929311	0.204544	0.048482	2.81124e-05	0.000293187	0.131872
rs2233632	Colon_Transverse	ENSG00000065060.16	UHRF1BP1	-4.25306605445179	-0.230476	0.0541905	2.82581e-05	0.000128195	0.26763
rs1260326	Pancreas	ENSG00000234072.1	AC074117.10	-4.26237715751921	-0.168361	0.0394994	2.86822e-05	0.000146645	0.959672
rs7078559	Thyroid	ENSG00000107854.5	TNKS2	4.21934312763684	0.0846586	0.0200644	2.90599e-05	0.00034658	0.0267483
rs3934712	Adipose_Subcutaneous	ENSG00000254135.1	RP11-32D16.1	4.21591238446483	0.142729	0.0338549	2.94228e-05	0.000234834	0.0766512
rs60276348	Pituitary	ENSG00000224383.7	PRR29	4.2777073884053	0.283689	0.066318	2.94328e-05	8.83652e-05	0.333333
rs12719778	Thyroid	ENSG00000255182.2	CTD-2517M22.14	4.21520587284533	-0.107858	0.0255878	2.95792e-05	0.000242507	0.0495091
rs13737	Adipose_Visceral_Omentum	ENSG00000177971.8	IMP3	-4.22373580392021	0.15017	0.0355539	2.97952e-05	0.000234501	0.379447
rs2233632	Thyroid	ENSG00000065060.16	UHRF1BP1	-4.20952855822898	-0.145437	0.0345496	3.03063e-05	0.000262339	0.498701
rs10195252	Thyroid	ENSG00000082438.15	COBLL1	4.20872368918869	-0.128374	0.030502	3.04107e-05	0.000337601	0.257065
rs601945	Stomach	ENSG00000241106.6	HLA-DOB	4.24274018770356	0.290088	0.0683727	3.04109e-05	8.47066e-05	0.584546
rs10937721	Whole_Blood	ENSG00000109501.13	WFS1	4.20144008134515	0.103635	0.0246665	3.05553e-05	6.08448e-05	0.174878
rs28505901	Adipose_Visceral_Omentum	ENSG00000213221.4	DNLZ	-4.21659975997661	0.184586	0.043776	3.07117e-05	5.53183e-05	0.261267
rs7222481	Stomach	ENSG00000109047.7	RCVRN	-4.23961090973089	-0.26256	0.0619302	3.08109e-05	3.298e-05	0.0608347
rs10097617	Stomach	ENSG00000164938.13	TP53INP1	-4.23342729540649	0.147759	0.0349028	3.1616e-05	5.3623e-05	0.0849136
rs1127215	Colon_Transverse	ENSG00000134256.12	CD101	-4.22456796432701	0.230052	0.0544557	3.18506e-05	9.52478e-05	0.292138
rs11257655	Muscle_Skeletal	ENSG00000183049.12	CAMK1D	4.18744427353251	0.15805	0.0377437	3.21926e-05	9.59785e-05	1
rs649961	Stomach	ENSG00000221955.10	SLC12A8	4.22863053318361	-0.126539	0.0299244	3.22545e-05	6.85611e-05	0.39681
rs4925109	Thyroid	ENSG00000108591.9	DRG2	4.19327705825358	-0.154156	0.0367626	3.24829e-05	0.000327192	0.846136
rs11642430	Colon_Transverse	ENSG00000183336.8	BOLA2	-4.21919950281989	-0.176184	0.0417578	3.25744e-05	0.000168587
rs1377807	Colon_Sigmoid	ENSG00000167740.9	CYB5D2	4.22753849866898	0.182405	0.0431469	3.2626e-05	5.90412e-05	0.234182
rs2268382	Adipose_Subcutaneous	ENSG00000272701.2	MESTIT1	-4.18897506673737	-0.148155	0.0353678	3.301e-05	0.00015658	0.0761187
rs4776970	Muscle_Skeletal	ENSG00000033800.13	PIAS1	-4.1777662749693	0.095607	0.0228847	3.35546e-05	0.000212054	0.972473
rs8046545	Pituitary	ENSG00000196993.8	NPIPB9	4.24396310536296	-0.405073	0.0954468	3.3795e-05	7.98447e-05	0.00931408
rs34855406	Muscle_Skeletal	ENSG00000108797.11	CNTNAP1	4.17449252468494	0.126181	0.0302267	3.40276e-05	0.000307481	0.0213207
rs28505901	Whole_Blood	ENSG00000213221.4	DNLZ	-4.17558855667156	0.180134	0.0431398	3.41301e-05	6.61217e-05	0.0869112
rs7022807	Colon_Sigmoid	ENSG00000147874.10	HAUS6	-4.21490869536002	-0.188748	0.0447811	3.43834e-05	6.20168e-05	0.0601612
rs1260326	Adipose_Subcutaneous	ENSG00000115241.10	PPM1G	-4.17837480564927	-0.0708489	0.0169561	3.45328e-05	0.000286467	0.9481
rs62007683	Colon_Sigmoid	ENSG00000126215.13	XRCC3	-4.21071761135536	0.136146	0.0323333	3.49863e-05	6.76182e-05	0.0161193
rs28505901	Adipose_Subcutaneous	ENSG00000213221.4	DNLZ	-4.17218214025617	0.186907	0.0447984	3.54531e-05	9.67852e-05	0.046488
rs35913461	Adipose_Subcutaneous	ENSG00000189292.15	ALKAL2	4.17195098601914	-0.154018	0.0369176	3.54879e-05	0.000277384	0.0561922
rs4776970	Pancreas	ENSG00000188779.10	SKOR1	-4.21031232409932	0.225573	0.0535763	3.56036e-05	7.60466e-05	0.995507
rs11496066	Colon_Transverse	ENSG00000267368.1	UPK3BL	-4.19732059494603	0.35955	0.0856618	3.56902e-05	0.000126428	0.0636103
rs3774723	Colon_Sigmoid	ENSG00000243410.1	PSMD6-AS1	4.20545532629585	-0.307549	0.073131	3.57577e-05	5.24375e-05	0.312954
rs8046545	Adipose_Subcutaneous	ENSG00000168488.18	ATXN2L	4.16899424723763	-0.0979235	0.0234885	3.5936e-05	0.000218028	0.0481288
rs1493694	Muscle_Skeletal	ENSG00000134250.19	NOTCH2	4.15981106311842	0.163348	0.0392681	3.62281e-05	0.000322517	0.0644486
rs28505901	Muscle_Skeletal	ENSG00000160360.12	GPSM1	-4.15969374003339	0.136125	0.0327247	3.62462e-05	8.77995e-05	0.237195
rs145678014	Thyroid	ENSG00000149100.12	EIF3M	4.16497316934777	-0.231832	0.0556623	3.66337e-05	0.000286228	0.406041
rs4932265	Muscle_Skeletal	ENSG00000166825.13	ANPEP	-4.15568082751803	0.140618	0.0338375	3.68712e-05	0.000147222	0.0555661
rs13737	Pituitary	ENSG00000177971.8	IMP3	-4.22234034397325	0.234592	0.0555598	3.69086e-05	0.000137308	0.0315665
rs601945	Small_Intestine_Terminal_Ileum	ENSG00000232629.8	HLA-DQB2	4.26844035168465	0.438931	0.102832	3.69891e-05	6.94512e-05	0.187595
rs62007683	Stomach	ENSG00000256053.7	APOPT1	4.19501260093527	-0.164085	0.0391143	3.70869e-05	5.43572e-05	0.000635973
rs6518681	Adipose_Subcutaneous	ENSG00000100296.13	THOC5	-4.16126292031563	-0.347352	0.0834726	3.71331e-05	0.0003449
rs35654957	Stomach	ENSG00000145214.13	DGKQ	-4.1934626010573	-0.179391	0.0427788	3.73256e-05	6.37822e-05	1
rs56348580	Stomach	ENSG00000157895.11	C12orf43	4.19138024932528	-0.180501	0.0430647	3.76486e-05	7.82283e-05	0.219005
rs2102278	Liver	ENSG00000163069.12	SGCB	-4.2322102899856	-0.287519	0.0679359	3.79855e-05	0.000108386	0.263648
rs4923543	Colon_Sigmoid	ENSG00000169519.20	METTL15	-4.19045963397174	-0.204822	0.0488783	3.80458e-05	0.000187313	0.412711
rs112915006	Colon_Sigmoid	ENSG00000188130.13	MAPK12	-4.19036865237617	-0.540298	0.128938	3.80601e-05	6.3616e-05	0.674892
rs601945	Whole_Blood	ENSG00000137411.16	VARS2	4.14953869402616	0.123963	0.029874	3.8133e-05	0.000303553
rs62492368	Adipose_Subcutaneous	ENSG00000213199.7	ASIC3	4.15219386251553	0.157711	0.0379827	3.85858e-05	0.000108738	0.871455
rs6600191	Adipose_Subcutaneous	ENSG00000076344.15	RGS11	4.15099550693605	-0.225845	0.0544075	3.87818e-05	0.000137195	0.181353
rs8107974	Colon_Transverse	ENSG00000250067.11	YJEFN3	4.17530273597431	0.213108	0.0510402	3.91118e-05	0.000107516	0.361031
rs3111316	Colon_Transverse	ENSG00000179115.10	FARSA	-4.17371411402704	-0.067151	0.016089	3.93704e-05	8.31804e-05	0.227536
rs11642430	Thyroid	ENSG00000183336.8	BOLA2	-4.14771409973086	-0.214048	0.0516063	3.94077e-05	0.000370779
rs7978610	Adipose_Visceral_Omentum	ENSG00000275389.1	RP11-214K3.24	4.15289137929303	-0.235291	0.0566572	4.01749e-05	8.7949e-05	0.0619158
rs13737	Muscle_Skeletal	ENSG00000169371.13	SNUPN	4.1346260173941	-0.105992	0.0256351	4.03216e-05	0.000427064	0.03393
rs11642430	Small_Intestine_Terminal_Ileum	ENSG00000149922.10	TBX6	4.24638141874987	0.28075	0.0661151	4.03446e-05	8.90082e-05	0.0791802
rs12719778	Muscle_Skeletal	ENSG00000160948.13	VPS28	-4.13310763430757	0.114091	0.0276041	4.0582e-05	0.000202476	0.486466
rs702634	Muscle_Skeletal	ENSG00000134363.11	FST	-4.1322597076043	-0.119492	0.0289168	4.07281e-05	0.000260409	0.526909
rs12001437	Adipose_Subcutaneous	ENSG00000237159.5	CNTFR-AS1	4.13709520674319	0.112152	0.0271089	4.11251e-05	0.00036697	1
rs3111316	Adipose_Visceral_Omentum	ENSG00000179115.10	FARSA	-4.14630730279169	-0.0790322	0.0190609	4.12978e-05	0.00011374	0.227804
rs7978610	Whole_Blood	ENSG00000197653.15	DNAH10	4.13052364612575	-0.112892	0.0273311	4.1333e-05	0.000141031	0.00143325
rs4930091	Adipose_Visceral_Omentum	ENSG00000110665.11	C11orf21	-4.14496936910138	-0.156176	0.0376784	4.15296e-05	6.26077e-05	0.00859474
rs12642790	Muscle_Skeletal	ENSG00000249242.7	TMEM150C	4.12441804330132	-0.152702	0.037024	4.2103e-05	0.000180384
rs601945	Adipose_Subcutaneous	ENSG00000204525.16	HLA-C	-4.13057917138488	-0.202053	0.0489164	4.22693e-05	0.000389202
rs35654957	Thyroid	ENSG00000178950.16	GAK	4.12754544184214	0.0975489	0.0236336	4.29027e-05	0.000199826	1
rs6600191	Adipose_Visceral_Omentum	ENSG00000103148.15	NPRL3	-4.13655972961117	0.205586	0.0496998	4.30153e-05	0.000119653	0.542667
rs3111316	Whole_Blood	ENSG00000179218.13	CALR	4.11994138938178	0.0747017	0.0181317	4.32228e-05	0.000132014	0.420474
rs12811407	Muscle_Skeletal	ENSG00000177084.16	POLE	-4.11736586053104	-0.120236	0.0292022	4.33772e-05	0.000210568	0.037533
rs1641523	Whole_Blood	ENSG00000170175.10	CHRNB1	-4.11907383209852	0.156977	0.0381098	4.33813e-05	0.000106059	0.198969
rs5213	Thyroid	ENSG00000187486.5	KCNJ11	-4.12472515295285	0.107882	0.0261549	4.34143e-05	0.000243168
rs60276348	Adipose_Subcutaneous	ENSG00000264954.1	PRR29-AS1	4.12336063887371	0.283385	0.0687267	4.35723e-05	0.000256094	0.309034
rs4776970	Adipose_Subcutaneous	ENSG00000245719.1	RP11-34F13.2	-4.12201714492624	0.19273	0.0467563	4.3819e-05	0.000170048	0.998895
rs11496066	Thyroid	ENSG00000267368.1	UPK3BL	-4.12204000437682	0.274003	0.0664726	4.39068e-05	0.000323783	0.0346815
rs11926707	Adipose_Subcutaneous	ENSG00000188086.13	PRSS45	-4.12149740002619	-0.199739	0.0484626	4.39148e-05	0.000409031	1
rs601945	Colon_Transverse	ENSG00000241106.6	HLA-DOB	4.14650310357497	0.215587	0.0519926	4.40615e-05	0.000122145	0.261766
rs4148856	Colon_Transverse	ENSG00000111325.16	OGFOD2	-4.14332976770022	-0.102906	0.0248365	4.4642e-05	0.000164468	0.331509
rs1641523	Whole_Blood	ENSG00000170049.9	KCNAB3	-4.11139527242641	0.128565	0.0312705	4.48086e-05	9.49196e-05	0.641564
rs12910825	Colon_Sigmoid	ENSG00000214432.9	AC068831.10	-4.14726863114259	-0.231382	0.0557915	4.54432e-05	6.26827e-05	0.446206
rs6600191	Muscle_Skeletal	ENSG00000185615.15	PDIA2	4.10547789045208	-0.228702	0.0557065	4.56084e-05	0.000125161	0.331535
rs6600191	Colon_Sigmoid	ENSG00000103148.15	NPRL3	-4.14600324884567	0.298667	0.0720373	4.56794e-05	8.26763e-05	0.582623
rs4776970	Adipose_Visceral_Omentum	ENSG00000033800.13	PIAS1	-4.11910178203421	0.125008	0.0303484	4.62625e-05	0.00012245	0.998113
rs77464186	Pituitary	ENSG00000186642.15	PDE2A	4.16561431276823	-0.439309	0.105461	4.64349e-05	9.89471e-05	0.33333
rs7124681	Muscle_Skeletal	ENSG00000134575.9	ACP2	4.09995903946666	0.098128	0.0239339	4.66809e-05	0.000683255	0.223238
rs7078559	Colon_Transverse	ENSG00000198060.9	MARCH5	-4.13090520512787	-0.165504	0.0400648	4.6986e-05	0.000167682	0.0243668
rs825452	Stomach	ENSG00000250091.2	DNAH10OS	-4.1357063012929	-0.191827	0.0463831	4.73424e-05	5.70881e-05	0.223216
rs5213	Thyroid	ENSG00000070081.15	NUCB2	4.10323626102765	-0.102617	0.0250087	4.75075e-05	0.000271037
rs34855406	Adipose_Subcutaneous	ENSG00000108784.9	NAGLU	-4.09840669456057	-0.112263	0.027392	4.83774e-05	0.000332051	0.295383
rs4776970	Adipose_Visceral_Omentum	ENSG00000270964.1	RP11-502I4.3	4.1074382834075	-0.199052	0.0484613	4.85606e-05	0.000110886	0.974897
rs80147536	Adipose_Subcutaneous	ENSG00000115970.18	THADA	-4.09700808540923	0.177767	0.0433895	4.86611e-05	0.000190211	0.00245019
rs3768321	Stomach	ENSG00000090621.13	PABPC4	-4.12831429126219	-0.129676	0.0314114	4.87958e-05	7.3255e-05	0.514318
rs2268078	Thyroid	ENSG00000078747.14	ITCH	4.0963661918922	0.0923296	0.0225394	4.88918e-05	0.000619433	0.0316156
rs601945	Stomach	ENSG00000224389.8	C4B	-4.12659051958368	-0.308783	0.0748277	4.91408e-05	9.14773e-05
rs61676547	Pituitary	ENSG00000278730.1	RP11-147L13.11	-4.15091113785518	-0.346506	0.0834771	4.92637e-05	5.12517e-05	0.0150526
rs8107974	Adipose_Visceral_Omentum	ENSG00000105726.16	ATP13A1	4.10227597781762	0.182007	0.0443673	4.9612e-05	0.000121514	0.380464
rs62059712	Thyroid	ENSG00000170049.9	KCNAB3	4.09055522190355	-0.302939	0.0740582	5.00926e-05	0.000158637
rs5758223	Whole_Blood	ENSG00000167077.12	MEI1	4.08193520322596	0.147056	0.0360261	5.07102e-05	0.000261812
rs116913033	Colon_Transverse	ENSG00000058404.19	CAMK2B	-4.11185540130904	0.191624	0.0466029	5.08089e-05	0.000111673	0.19156
rs1005752	Pituitary	ENSG00000259362.2	RP11-307C19.1	4.14240473210149	0.367512	0.0887196	5.09746e-05	0.000107408	0.0983231
rs1531583	Stomach	ENSG00000185619.18	PCGF3	-4.11742424296446	-0.385015	0.0935088	5.10148e-05	7.17239e-05	0.762023
rs4148856	Stomach	ENSG00000150967.17	ABCB9	-4.11683860481248	-0.165316	0.0401562	5.11368e-05	0.000104273	0.203821
rs3768321	Stomach	ENSG00000228060.1	RP11-69E11.8	-4.1154610204705	-0.299466	0.072766	5.14249e-05	5.64115e-05	0.0970463
rs601945	Thyroid	ENSG00000232629.8	HLA-DQB2	4.08030636262538	0.292415	0.0716649	5.22789e-05	0.000286956	0.159506
rs6600191	Adipose_Subcutaneous	ENSG00000103148.15	NPRL3	-4.07912532068685	0.187958	0.046078	5.24308e-05	0.000161449	0.447199
rs4688760	Colon_Sigmoid	ENSG00000173531.15	MST1	4.11132104391601	0.183718	0.0446859	5.26273e-05	0.000411309	0.978557
rs2800733	Muscle_Skeletal	ENSG00000118518.15	RNF146	-4.07112454768724	0.118211	0.0290366	5.26854e-05	0.000355421	0.0950933
rs11496066	Whole_Blood	ENSG00000168255.19	POLR2J3	-4.07223148872675	0.235976	0.0579475	5.28107e-05	0.000242618	0.0788534
rs11642430	Adipose_Visceral_Omentum	ENSG00000183336.8	BOLA2	-4.08655361795322	-0.232978	0.0570108	5.29494e-05	0.000193684
rs12910825	Muscle_Skeletal	ENSG00000184056.14	VPS33B	4.06700003937637	0.118413	0.0291155	5.36021e-05	0.000128766	0.824998
rs11070332	Colon_Transverse	ENSG00000243789.10	JMJD7	4.09431732089115	0.204836	0.0500295	5.45889e-05	0.000147255	0.260609
rs649961	Thyroid	ENSG00000221955.10	SLC12A8	-4.06856058441622	0.117744	0.0289401	5.48962e-05	0.000223382	0.329287
rs34855406	Thyroid	ENSG00000267222.1	RP11-194N12.2	4.06518779518005	0.227632	0.0559955	5.56704e-05	0.000332734	0.147408
rs12001437	Thyroid	ENSG00000164978.17	NUDT2	-4.06353408002045	-0.148432	0.0365279	5.60538e-05	0.000387214	1
rs11496066	Adipose_Visceral_Omentum	ENSG00000267368.1	UPK3BL	-4.07253566825248	0.316875	0.0778077	5.61041e-05	0.000169631	0.0277203
rs8046545	Thyroid	ENSG00000196993.8	NPIPB9	4.06253699157294	-0.212815	0.0523848	5.62862e-05	0.000242338	0.00108091
rs1641523	Whole_Blood	ENSG00000129244.8	ATP1B2	-4.056239689219	0.0984452	0.0242701	5.64538e-05	9.58055e-05	0.382885
rs1580278	Thyroid	ENSG00000138778.11	CENPE	4.06105405948745	-0.174849	0.0430551	5.66335e-05	0.000323037	0.998824
rs10097617	Adipose_Visceral_Omentum	ENSG00000164941.13	INTS8	4.06963294329351	-0.0991443	0.024362	5.67793e-05	0.000104286	0.225446
rs3751837	Whole_Blood	ENSG00000213918.10	DNASE1	-4.05407965753851	-0.0749473	0.0184869	5.69638e-05	0.000121013	0.832763
rs112915006	Colon_Transverse	ENSG00000188130.13	MAPK12	-4.08222878651854	-0.418816	0.102595	5.73487e-05	6.49162e-05	0.531746
rs35895680	Muscle_Skeletal	ENSG00000159202.17	UBE2Z	-4.04927851974116	0.100669	0.0248609	5.77158e-05	0.000261318
rs4977213	Colon_Transverse	ENSG00000071894.16	CPSF1	-4.08009045540827	0.227467	0.0557506	5.78505e-05	0.000120576	0.107114
rs601945	Pancreas	ENSG00000137411.16	VARS2	4.08817094073246	0.353585	0.0864897	5.86408e-05	0.000161728
rs862320	Pituitary	ENSG00000157322.17	CLEC18A	4.10638296053548	-0.357775	0.0871265	5.88693e-05	0.000125418	0.123137
rs1377807	Adipose_Visceral_Omentum	ENSG00000074755.14	ZZEF1	4.05939921528291	0.0823899	0.0202961	5.92219e-05	6.64951e-05	0.0645056
rs1260326	Muscle_Skeletal	ENSG00000115241.10	PPM1G	-4.04286884055021	-0.0593151	0.0146715	5.92761e-05	0.000274746	0.955407
rs11496066	Adipose_Subcutaneous	ENSG00000170632.13	ARMC10	-4.04909362661959	0.167763	0.0414322	5.93933e-05	0.000248797	0.420981
rs145678014	Adipose_Subcutaneous	ENSG00000149100.12	EIF3M	4.04802224716471	-0.171693	0.0424141	5.96573e-05	0.000208902	0.458641
rs7669833	Whole_Blood	ENSG00000109670.13	FBXW7	4.0422058468004	-0.068862	0.0170357	5.98463e-05	0.000144059	0.0870853
rs72802342	Whole_Blood	ENSG00000153774.8	CFDP1	4.04165516065769	-0.172901	0.0427799	5.99833e-05	0.000168366	0.00170605
rs12140153	Thyroid	ENSG00000132849.19	PATJ	4.04600204664837	-0.170008	0.0420188	6.02758e-05	0.000184951
rs2268078	Whole_Blood	ENSG00000100991.11	TRPC4AP	-4.03818945501644	-0.0750623	0.0185881	6.08523e-05	0.000482312
rs62357230	Colon_Transverse	ENSG00000247796.2	CTD-2366F13.1	4.0675120776049	0.536279	0.131844	6.08879e-05	0.000135856	0.306904
rs7115753	Whole_Blood	ENSG00000121671.11	CRY2	-4.03788599531921	0.0814497	0.0201714	6.0929e-05	0.000215996	0.001417
rs1796330	Muscle_Skeletal	ENSG00000127324.8	TSPAN8	4.03537341899896	-0.0910565	0.0225646	6.11516e-05	0.000202533	0.803283
rs3115960	Thyroid	ENSG00000166822.12	TMEM170A	-4.04210212348787	0.0926495	0.0229211	6.12551e-05	0.000223969	0.0082014
rs56376556	Muscle_Skeletal	ENSG00000267368.1	UPK3BL	-4.03295871598114	-0.489647	0.121411	6.17677e-05	0.000291058	0.689432
rs11070332	Colon_Sigmoid	ENSG00000243789.10	JMJD7	4.07135055850058	0.198886	0.0488501	6.18834e-05	0.000160847	0.296845
rs1783541	Small_Intestine_Terminal_Ileum	ENSG00000172803.17	SNX32	4.13407015360342	0.509284	0.123192	6.24793e-05	9.91185e-05	0.182101
rs7249758	Adipose_Subcutaneous	ENSG00000127663.14	KDM4B	4.03526298726486	0.104501	0.0258969	6.28873e-05	9.24421e-05	0.119299
rs12140153	Thyroid	ENSG00000240563.1	L1TD1	4.03463143162182	-0.360111	0.089255	6.31736e-05	0.000199739
rs4148856	Pancreas	ENSG00000150967.17	ABCB9	-4.06596746911658	-0.198767	0.0488855	6.41296e-05	0.00013562	0.337865
rs28505901	Thyroid	ENSG00000213221.4	DNLZ	-4.03038261119278	0.200318	0.0497019	6.429e-05	0.000114027	0.151614
rs11070332	Adipose_Subcutaneous	ENSG00000247556.6	OIP5-AS1	4.02966563334999	0.114357	0.0283789	6.4356e-05	0.000275807	0.622159
rs8046545	Thyroid	ENSG00000261766.1	RP11-22P6.2	4.02915137804523	-0.172073	0.042707	6.46169e-05	0.000298212	0.0591462
rs8046545	Thyroid	ENSG00000188603.18	CLN3	-4.02907834401298	0.0981389	0.0243577	6.46364e-05	0.000268331	0.1071
rs2233632	Adipose_Subcutaneous	ENSG00000124562.9	SNRPC	4.02676858939462	0.0861585	0.0213964	6.5129e-05	0.000257879	0.499233
rs601945	Whole_Blood	ENSG00000241106.6	HLA-DOB	4.02096148217435	0.146568	0.0364509	6.53523e-05	0.000164968	0.374952
rs28638142	Whole_Blood	ENSG00000135124.14	P2RX4	4.01979525743316	0.292542	0.0727753	6.56681e-05	0.000188192	0.351535
rs78403475	Whole_Blood	ENSG00000187796.13	CARD9	4.01922039385741	-0.144867	0.0360436	6.58243e-05	8.16886e-05	0.00164325
rs4930091	Whole_Blood	ENSG00000110651.11	CD81	-4.01876313687202	-0.063261	0.0157414	6.59488e-05	8.77734e-05	0.0599952
rs11070332	Thyroid	ENSG00000243708.10	PLA2G4B	4.02406198682464	0.0781955	0.019432	6.59854e-05	0.000352996	0.221969
rs3772071	Pancreas	ENSG00000115221.10	ITGB6	-4.05793502876225	-0.202864	0.0499919	6.62331e-05	0.000111141	0.125609
rs17122772	Thyroid	ENSG00000172590.18	MRPL52	-4.01967673430173	-0.0930087	0.0231384	6.71866e-05	0.000115097	0.299328
rs12910825	Muscle_Skeletal	ENSG00000196547.14	MAN2A2	-4.01226832386717	-0.087062	0.0216989	6.72935e-05	0.000116318	0.940248
rs10097617	Adipose_Subcutaneous	ENSG00000175305.17	CCNE2	4.0168543064179	-0.180865	0.0450266	6.78413e-05	0.00017054	0.227389
rs12001437	Pituitary	ENSG00000164978.17	NUDT2	-4.07011996508536	-0.233505	0.0573705	6.79875e-05	0.000115937	1
rs57327348	Thyroid	ENSG00000104643.9	MTMR9	-4.01672457851655	0.130321	0.0324445	6.80069e-05	0.000185268	1
rs4977213	Muscle_Skeletal	ENSG00000160948.13	VPS28	-4.00739312111948	0.11561	0.0288492	6.86622e-05	0.000202476	0.0434557
rs55653563	Colon_Transverse	ENSG00000232063.1	RP11-307E17.8	-4.03747241663371	0.171164	0.0423937	6.87675e-05	0.000151214	0.21749
rs2767036	Whole_Blood	ENSG00000110435.11	PDHX	-4.008543029391	0.105793	0.0263918	6.879e-05	0.000116794	0.0431563
rs10406431	Adipose_Subcutaneous	ENSG00000125743.10	SNRPD2	4.00881731030734	-0.0688806	0.0171823	7.01183e-05	0.000130444	0.101488
rs3751837	Adipose_Visceral_Omentum	ENSG00000126602.10	TRAP1	4.01738333463496	0.16595	0.0413079	7.03375e-05	8.60475e-05	0.729351
rs96844	Thyroid	ENSG00000234553.1	AC022431.3	4.00841787239021	-0.242371	0.0604654	7.03662e-05	0.000186768	0.441054
rs57327348	Adipose_Visceral_Omentum	ENSG00000269918.1	AF131215.9	-4.01617362657717	0.198935	0.0495335	7.06851e-05	9.71964e-05	0.971204
rs8046545	Adipose_Subcutaneous	ENSG00000213658.11	LAT	-4.00175794626529	0.109246	0.0272996	7.21781e-05	0.000250968	0.191879
rs3810291	Adipose_Subcutaneous	ENSG00000142230.11	SAE1	-3.99842882829565	-0.0972148	0.0243132	7.31692e-05	9.8575e-05	0.291349
rs60276348	Adipose_Visceral_Omentum	ENSG00000224383.7	PRR29	4.00738241752674	0.196857	0.0491235	7.32611e-05	0.000191372	0.352099
rs116913033	Muscle_Skeletal	ENSG00000015676.17	NUDCD3	3.98798372511405	-0.139515	0.0349839	7.43774e-05	0.000227134	0.351051
rs4279506	Muscle_Skeletal	ENSG00000188732.10	FAM221A	-3.98643092751875	0.149576	0.0375213	7.48536e-05	0.000259926
rs1783541	Colon_Transverse	ENSG00000172922.8	RNASEH2C	-4.01609856085689	-0.120558	0.0300187	7.49545e-05	0.000165633	0.0888401
rs7124681	Thyroid	ENSG00000134575.9	ACP2	3.9919258479312	0.114779	0.0287527	7.52826e-05	0.000834115	0.219693
rs10842994	Colon_Sigmoid	ENSG00000256377.5	RP11-1060J15.4	-4.02232731729613	0.40377	0.100382	7.53588e-05	9.61851e-05	0.0715874
rs4688760	Adipose_Subcutaneous	ENSG00000173540.12	GMPPB	3.99095710503712	0.114347	0.0286515	7.54409e-05	0.000814719	0.966381
rs4688760	Muscle_Skeletal	ENSG00000173540.12	GMPPB	3.97863651706371	0.13559	0.0340796	7.7288e-05	0.00100027	0.882815
rs11070332	Stomach	ENSG00000062524.15	LTK	-4.01402172577275	-0.157043	0.0391235	7.74578e-05	0.000107256	0.26691
rs58730668	Thyroid	ENSG00000151725.11	CENPU	-3.98401672926792	0.24418	0.0612898	7.77543e-05	0.000112335	0.0303874
rs3774723	Muscle_Skeletal	ENSG00000243410.1	PSMD6-AS1	3.97668727739529	-0.227447	0.0571952	7.79084e-05	0.000127647	0.47443
rs10097617	Muscle_Skeletal	ENSG00000156170.12	NDUFAF6	3.97413047017434	-0.0921742	0.0231935	7.87293e-05	0.000189172	0.0772053
rs1260326	Adipose_Visceral_Omentum	ENSG00000234072.1	AC074117.10	-3.98846511021892	-0.108	0.027078	7.91098e-05	0.000187224	0.808364
rs11642430	Pancreas	ENSG00000102882.11	MAPK3	-4.01261305546318	-0.16672	0.041549	7.93885e-05	0.000145828	0.0784965
rs77464186	Adipose_Visceral_Omentum	ENSG00000214530.8	STARD10	-3.9874723846325	0.180061	0.0451567	7.94286e-05	0.000171157	0.392131
rs62482405	Muscle_Skeletal	ENSG00000222011.8	FAM185A	3.97059518810625	0.203792	0.0513254	7.9878e-05	0.000276034
rs2581787	Adipose_Visceral_Omentum	ENSG00000055955.15	ITIH4	3.98600976695682	0.154486	0.0387569	7.99006e-05	0.000207326	0.0956653
rs6600191	Thyroid	ENSG00000103148.15	NPRL3	-3.97633958050431	0.161177	0.040534	8.0227e-05	0.000158365	0.519823
rs12001437	Pancreas	ENSG00000010438.16	PRSS3	4.00899092963685	0.204091	0.0509083	8.05408e-05	9.4271e-05	1
rs8046545	Colon_Transverse	ENSG00000176953.12	NFATC2IP	-3.99749519771479	0.111076	0.0277865	8.07668e-05	0.000135058	0.0938037
rs1783541	Colon_Sigmoid	ENSG00000173338.12	KCNK7	-4.00359443517239	-0.262757	0.0656304	8.12106e-05	0.000152846	0.222396
rs2581787	Colon_Sigmoid	ENSG00000163935.13	SFMBT1	3.99844437339191	0.194654	0.0486823	8.28935e-05	0.000164898	0.132179
rs10954772	Adipose_Subcutaneous	ENSG00000104691.14	UBXN8	3.96722172967092	-0.120971	0.0304927	8.31093e-05	0.000187763	0.0715568
rs3111316	Whole_Blood	ENSG00000104903.4	LYL1	-3.96226188708819	-0.08204	0.0207053	8.31733e-05	0.000124531	0.67555
rs12719778	Pituitary	ENSG00000196378.11	ZNF34	-4.01834876870576	0.239848	0.0596882	8.33666e-05	0.000107233	0.352989
rs28638142	Whole_Blood	ENSG00000089041.16	P2RX7	-3.96080754294244	-0.28206	0.0712128	8.36685e-05	0.000207978	0.202912
rs4281707	Adipose_Visceral_Omentum	ENSG00000166971.16	AKTIP	-3.9740736755376	0.127515	0.0320866	8.3853e-05	8.60591e-05	0.177915
rs8046545	Pituitary	ENSG00000177548.12	RABEP2	-4.01410652317227	0.171854	0.0428126	8.4764e-05	0.000110171	0.129113
rs2268382	Adipose_Visceral_Omentum	ENSG00000270953.1	RP11-2E11.9	-3.96969404950074	-0.1667	0.0419932	8.53492e-05	0.000105151	0.0540377
rs2307111	Muscle_Skeletal	ENSG00000152359.14	POC5	3.95385514087614	-0.108156	0.0273545	8.55358e-05	0.00021466	0.80813
rs11070332	Adipose_Visceral_Omentum	ENSG00000062524.15	LTK	3.96555990047194	0.221864	0.0559478	8.67848e-05	0.000188892	0.764134
rs6884702	Colon_Transverse	ENSG00000272335.1	RP11-53O19.3	-3.97852335452645	-0.145577	0.0365907	8.71338e-05	0.000251285	0.00769427
rs4688760	Thyroid	ENSG00000173540.12	GMPPB	3.95531071293169	0.0778604	0.019685	8.73875e-05	0.00112873	0.75571
rs11642430	Stomach	ENSG00000149927.17	DOC2A	-3.98148823282129	-0.221856	0.0557218	8.81809e-05	0.000113098	0.0164325
rs2581787	Adipose_Subcutaneous	ENSG00000055955.15	ITIH4	3.95000105716963	0.113638	0.0287691	8.91293e-05	0.000313399	0.140824
rs11642430	Adipose_Visceral_Omentum	ENSG00000169203.16	NPIPB12	3.95701499381896	0.230459	0.0582406	8.98249e-05	0.00018688
rs11496066	Whole_Blood	ENSG00000230257.2	NFE4	3.94248947550984	-0.106167	0.0269288	9.01496e-05	0.000214465	0.485538
rs61676547	Muscle_Skeletal	ENSG00000278740.1	RP11-147L13.14	3.94067031973064	0.217247	0.0551295	9.02572e-05	0.000142059	0.0453776
rs34855406	Thyroid	ENSG00000108797.11	CNTNAP1	3.94726588393179	0.131087	0.0332096	9.02837e-05	0.000371737	0.0478277
rs7978610	Colon_Sigmoid	ENSG00000197653.15	DNAH10	3.97604940556003	-0.282129	0.0709572	9.0605e-05	9.13007e-05	1.71114e-05
rs2268382	Adipose_Visceral_Omentum	ENSG00000158623.14	COPG2	-3.95276413520706	-0.156175	0.0395103	9.13746e-05	9.58475e-05	0.0909537
rs35895680	Adipose_Subcutaneous	ENSG00000170703.15	TTLL6	3.94328974432483	-0.157706	0.0399936	9.15855e-05	0.000238711
rs3772071	Muscle_Skeletal	ENSG00000153246.12	PLA2R1	3.93509635106222	0.104648	0.0265935	9.23265e-05	0.000259226	0.48513
rs1783541	Colon_Transverse	ENSG00000172543.7	CTSW	-3.96330610952461	-0.257789	0.0650439	9.25822e-05	0.000203784	0.0410575
rs11926707	Stomach	ENSG00000181555.20	SETD2	3.96644159819459	0.114229	0.028799	9.36041e-05	0.000177973	0.525242
rs601945	Adipose_Subcutaneous	ENSG00000232629.8	HLA-DQB2	3.93569275239775	0.315751	0.0802276	9.44432e-05	0.000256108	0.188807
rs3768321	Whole_Blood	ENSG00000183682.7	BMP8A	3.92709373471536	0.203162	0.0517334	9.59617e-05	0.00014948	0.143564
rs17013314	Adipose_Subcutaneous	ENSG00000174738.12	NR1D2	3.93143383811284	0.376698	0.095817	9.60819e-05	0.000189153	0.00274478
rs8046545	Thyroid	ENSG00000176953.12	NFATC2IP	-3.93070497755226	0.0988643	0.0251518	9.65346e-05	0.000300734	0.064931
rs4688760	Whole_Blood	ENSG00000164078.12	MST1R	-3.92425222727222	-0.213991	0.0545305	9.70725e-05	0.000755089	0.943872
rs3115960	Adipose_Visceral_Omentum	ENSG00000153774.8	CFDP1	-3.93728136652954	0.0925057	0.0234948	9.7236e-05	0.00011219	3.13973e-06
rs13737	Adipose_Visceral_Omentum	ENSG00000140398.13	NEIL1	3.93230650387951	-0.0894727	0.0227532	9.91938e-05	0.000233177	0.000414604
rs3111316	Thyroid	ENSG00000167815.11	PRDX2	3.92357845214925	0.0606486	0.0154575	9.93488e-05	0.000220354	0.330397
rs1580278	Stomach	ENSG00000246560.2	RP11-10L12.4	3.94909877403387	-0.256651	0.0649898	0.000100248	0.000102428	0.992616
rs10842994	Muscle_Skeletal	ENSG00000087448.9	KLHL42	-3.91227395167299	0.126733	0.0323937	0.000101277	0.000235263	0.0284963
rs12920022	Muscle_Skeletal	ENSG00000261253.2	AC137932.6	-3.91022421440505	-0.164516	0.0420734	0.00010212	0.000148852
rs601945	Pancreas	ENSG00000204528.3	PSORS1C3	3.9485419567196	0.404194	0.102365	0.000102284	0.000194501
rs57235767	Muscle_Skeletal	ENSG00000166002.6	SMCO4	-3.90980996398946	0.135685	0.0347037	0.000102291	0.00026162	0.806703
rs11070332	Colon_Sigmoid	ENSG00000137877.9	SPTBN5	3.94443089708912	0.277726	0.0704096	0.00010266	0.000164222	0.466042
rs862320	Colon_Transverse	ENSG00000157322.17	CLEC18A	3.93644351630413	-0.241452	0.0613375	0.000102998	0.000179029	0.039212
rs11642430	Colon_Sigmoid	ENSG00000169203.16	NPIPB12	3.94271626882737	0.271644	0.0688976	0.000103356	0.000148802
rs56348580	Pancreas	ENSG00000157895.11	C12orf43	3.94506092731225	-0.233952	0.0593026	0.000103692	0.000106976	0.217699
rs8046545	Colon_Transverse	ENSG00000196296.13	ATP2A1	-3.93433818122264	0.184466	0.0468861	0.00010386	0.000139686	0.177941
rs4688760	Muscle_Skeletal	ENSG00000164078.12	MST1R	3.90595904287617	0.162542	0.0416139	0.000103895	0.00090339	0.947232
rs348330	Adipose_Subcutaneous	ENSG00000069248.11	NUP133	3.90828449735233	-0.10691	0.0273547	0.000105471	0.000144943	1
rs9379084	Muscle_Skeletal	ENSG00000124783.12	SSR1	3.90080044202451	-0.15937	0.0408557	0.000106081	0.000114283	0.0873424
rs61676547	Thyroid	ENSG00000265055.1	AC145343.2	3.90404170981717	0.248409	0.0636286	0.000107467	0.000201424	0.0272438
rs4688760	Adipose_Subcutaneous	ENSG00000243477.5	NAT6	3.90195495818517	0.132124	0.033861	0.000108185	0.000874905	0.876248
rs4977213	Adipose_Visceral_Omentum	ENSG00000071894.16	CPSF1	-3.91010215012883	0.220736	0.0564527	0.000108397	0.000122364	0.155011
rs1005752	Adipose_Subcutaneous	ENSG00000140382.14	HMG20A	3.90021021772667	0.139831	0.0358522	0.000108945	0.000312294	0.0555558
rs4925109	Colon_Transverse	ENSG00000197815.4	RP1-253P7.4	3.92148514665431	-0.119177	0.0303907	0.00010927	0.000118743	0.568761
rs7978610	Adipose_Subcutaneous	ENSG00000197653.15	DNAH10	3.89891677818159	-0.203157	0.052106	0.000109512	0.000181732	2.29027e-08
rs11926707	Thyroid	ENSG00000114648.11	KLHL18	3.89922855240248	0.114069	0.0292542	0.000109562	0.000641725	0.997627
rs80147536	Adipose_Subcutaneous	ENSG00000152518.7	ZFP36L2	-3.89784978440655	0.231821	0.059474	0.000109981	0.000209697	0.0120868
rs2028150	Whole_Blood	ENSG00000198369.9	SPRED2	-3.88524940769874	0.121641	0.0313085	0.000113603	0.00013219	0.14872
rs2727301	Adipose_Subcutaneous	ENSG00000198231.12	DDX42	-3.88957490022901	0.0972829	0.0250112	0.000113687	0.000249283	0.276671
rs2268078	Pancreas	ENSG00000088298.12	EDEM2	3.91916327476198	0.167811	0.0428181	0.000114764	0.000243403
rs17013314	Whole_Blood	ENSG00000182247.9	UBE2E2	-3.88239692881459	-0.296631	0.0764042	0.000114911	0.000192075	0.00249274
rs1377807	Thyroid	ENSG00000263312.1	LINC01975	3.88656836233068	0.146638	0.0377294	0.000115256	0.000145511	0.706175
rs8046545	Muscle_Skeletal	ENSG00000261766.1	RP11-22P6.2	3.87832079203374	-0.189714	0.0489167	0.000116124	0.000249649	0.0708366
rs3111316	Whole_Blood	ENSG00000167815.11	PRDX2	3.87837544822967	0.0686189	0.0176927	0.000116779	0.000142802	0.413146
rs4736819	Whole_Blood	ENSG00000029534.19	ANK1	3.87825054034979	0.0533233	0.0137493	0.000116838	0.000161953	0.295982
rs2727301	Adipose_Visceral_Omentum	ENSG00000198231.12	DDX42	-3.88561861189396	0.121084	0.0311621	0.000119479	0.000143141	0.00639333
rs1783541	Colon_Transverse	ENSG00000254614.2	AP003068.23	3.89842235086826	0.249996	0.0641275	0.000119655	0.000165953	0.152472
rs429358	Thyroid	ENSG00000266903.1	CTB-171A8.1	3.87538012905526	-0.296786	0.0765823	0.000120521	0.000172923
rs2102278	Stomach	ENSG00000109184.14	DCUN1D4	3.90159648811559	0.13893	0.0356085	0.000120813	0.00023714	0.0691801
rs7178762	Thyroid	ENSG00000197361.7	FBXL22	3.87475943317197	-0.126995	0.0327751	0.00012082	0.000269099	0.0622179
rs12719778	Adipose_Visceral_Omentum	ENSG00000167702.11	KIFC2	3.88161920319514	-0.106901	0.0275404	0.000121389	0.000124222	0.532936
rs7022807	Thyroid	ENSG00000147874.10	HAUS6	-3.86927578503907	-0.111985	0.0289421	0.000123489	0.000178353	0.11827
rs1783541	Adipose_Visceral_Omentum	ENSG00000173338.12	KCNK7	-3.87614527682619	-0.151999	0.0392139	0.000124049	0.000204306	0.126402
rs8107974	Adipose_Subcutaneous	ENSG00000213996.12	TM6SF2	3.86727109826577	0.292036	0.0755148	0.000124272	0.000227796	0.382187
rs7022807	Thyroid	ENSG00000155875.13	SAXO1	-3.86741056026845	-0.213808	0.0552844	0.000124409	0.000176858	0.0400123
rs7078559	Colon_Transverse	ENSG00000107854.5	TNKS2	3.8842745742734	0.112106	0.0288616	0.000126482	0.000158961	0.03067
rs8046545	Thyroid	ENSG00000196296.13	ATP2A1	-3.86260234145347	0.166969	0.043227	0.000126812	0.000292645	0.21413
rs2102278	Muscle_Skeletal	ENSG00000163069.12	SGCB	-3.85601697885432	-0.0707623	0.0183511	0.000126973	0.000533121	0.00262926
rs12910825	Adipose_Subcutaneous	ENSG00000214432.9	AC068831.10	-3.85993899437732	-0.217974	0.0564708	0.000127951	0.000135917	0.805165
rs3811978	Muscle_Skeletal	ENSG00000152684.10	PELO	-3.84985889073307	-0.126436	0.0328418	0.000130133	0.00027309	0.499919
rs3751837	Thyroid	ENSG00000126602.10	TRAP1	3.8549546726616	0.210162	0.0545174	0.000130724	0.000168564	0.417577
rs1005752	Muscle_Skeletal	ENSG00000140382.14	HMG20A	3.84755145869501	0.0783829	0.0203721	0.000131336	0.000308173	0.00786736
rs6600191	Muscle_Skeletal	ENSG00000103148.15	NPRL3	-3.84737940614396	0.166937	0.0433897	0.000131426	0.00014693	0.115462
rs11926707	Colon_Transverse	ENSG00000188086.13	PRSS45	-3.86648128142854	-0.20701	0.0535397	0.000135592	0.000198174	1
rs12719778	Muscle_Skeletal	ENSG00000187954.12	CYHR1	-3.83849348763644	0.0675312	0.0175931	0.000136161	0.000226234	0.496601
rs1796330	Thyroid	ENSG00000139292.12	LGR5	3.84316384143627	-0.167431	0.0435658	0.00013698	0.000302445	0.492709
rs11070332	Muscle_Skeletal	ENSG00000243708.10	PLA2G4B	3.83289366350054	0.0758544	0.0197904	0.000139227	0.000329245	0.182666
rs8046545	Adipose_Subcutaneous	ENSG00000196993.8	NPIPB9	3.83638582036739	-0.225476	0.0587731	0.000140478	0.000216203	0.0390133
rs9430095	Thyroid	ENSG00000261000.1	RP11-534L20.5	-3.83504588941032	-0.200922	0.0523911	0.000141451	0.00019509	0.422635
rs3811978	Thyroid	ENSG00000152684.10	PELO	-3.83331771202798	-0.17516	0.0456941	0.00014242	0.000342123	0.497641
rs1412830	Muscle_Skeletal	ENSG00000147883.10	CDKN2B	3.82084410380041	-0.139878	0.0366092	0.000146047	0.000181283
rs34855406	Adipose_Subcutaneous	ENSG00000126581.12	BECN1	3.82640969045852	0.0865558	0.0226206	0.000146125	0.000334304	0.181093
rs12719778	Muscle_Skeletal	ENSG00000197363.9	ZNF517	3.81941737078869	-0.113257	0.029653	0.000146875	0.000289634	0.68766
rs60276348	Adipose_Subcutaneous	ENSG00000108622.10	ICAM2	3.82035572289457	0.145634	0.0381206	0.000149656	0.000250193	0.353715
rs8046545	Adipose_Subcutaneous	ENSG00000260517.2	RP11-426C22.5	-3.81141737784623	0.160147	0.0420178	0.000155017	0.000315881	0.131495
rs11642430	Adipose_Visceral_Omentum	ENSG00000149927.17	DOC2A	-3.818387898842	-0.0965876	0.0252954	0.000155688	0.00018718	0.0467449
rs1580278	Adipose_Subcutaneous	ENSG00000109332.19	UBE2D3	-3.81013727741893	0.0592598	0.0155532	0.000155799	0.000348703	0.999339
rs601945	Whole_Blood	ENSG00000198563.13	DDX39B	-3.80499854983609	-0.131591	0.0345838	0.000156346	0.000290383
rs4925109	Whole_Blood	ENSG00000133027.17	PEMT	3.80375738478832	-0.0923398	0.0242759	0.000157113	0.000199112	0.768886
rs62007683	Thyroid	ENSG00000166165.12	CKB	-3.80709416359955	0.127103	0.0333857	0.000157921	0.000183701	0.0043568
rs2102278	Adipose_Visceral_Omentum	ENSG00000163069.12	SGCB	3.81457364600314	0.109811	0.0287872	0.000158026	0.00034653	0.266343
rs11496066	Adipose_Subcutaneous	ENSG00000222011.8	FAM185A	-3.80620844212608	0.199575	0.0524342	0.000158224	0.000299801	0.188163
rs3115960	Adipose_Subcutaneous	ENSG00000166822.12	TMEM170A	-3.80366040937711	0.0957084	0.0251622	0.000159816	0.000171643	0.0556009
rs8107974	Adipose_Subcutaneous	ENSG00000250067.11	YJEFN3	3.80294920139804	0.186857	0.0491346	0.000160263	0.000229136	0.218808
rs12719778	Thyroid	ENSG00000198169.8	ZNF251	-3.80060205145798	0.0983003	0.0258644	0.000161997	0.000297018	0.693432
rs4776970	Thyroid	ENSG00000270964.1	RP11-502I4.3	3.79717266151081	-0.15403	0.0405644	0.00016419	0.000191794	0.987996
rs5213	Muscle_Skeletal	ENSG00000129159.7	KCNC1	-3.78296799426824	0.131254	0.0346961	0.000169596	0.000189843
rs13737	Thyroid	ENSG00000198794.11	SCAMP5	3.78719435652447	-0.167708	0.0442828	0.000170732	0.000362749
rs77136196	Adipose_Subcutaneous	ENSG00000198755.10	RPL10A	-3.78518436402541	-0.147739	0.0390307	0.000171816	0.000354037
rs12719778	Whole_Blood	ENSG00000147799.11	ARHGAP39	-3.77697594188683	0.16411	0.0434502	0.000174557	0.000197725	0.716994
rs2727301	Thyroid	ENSG00000198231.12	DDX42	-3.77958316204311	0.0829587	0.0219492	0.000175886	0.000302066	0.0610311
rs115505614	Thyroid	ENSG00000145730.20	PAM	-3.77535099024726	-0.222772	0.0590071	0.000178816	0.000411747	0.257913
rs601945	Colon_Transverse	ENSG00000204536.13	CCHCR1	-3.79289192228523	-0.152549	0.0402198	0.00018029	0.0002445
rs8107974	Thyroid	ENSG00000213996.12	TM6SF2	3.77297359194342	0.315182	0.0835366	0.000180481	0.000265238	0.465021
rs1005752	Whole_Blood	ENSG00000159556.9	ISL2	3.76698583823702	0.148559	0.0394372	0.00018152	0.000396086
rs11926707	Adipose_Subcutaneous	ENSG00000181555.20	SETD2	3.77082972679283	0.0753069	0.0199709	0.000181722	0.000520468	0.999496
rs4688760	Small_Intestine_Terminal_Ileum	ENSG00000182179.12	UBA7	-3.84465631162984	-0.15521	0.0403702	0.000185775	0.000226314	0.961656
rs1005752	Thyroid	ENSG00000269951.1	RP11-797A18.6	3.76475757797001	0.155423	0.0412838	0.000186351	0.000439636	0.0646292
rs7115753	Adipose_Subcutaneous	ENSG00000121653.11	MAPK8IP1	-3.76333777858339	0.13197	0.0350674	0.000187103	0.000266939	0.0542299
rs1580278	Thyroid	ENSG00000246560.2	RP11-10L12.4	3.75434568649556	-0.174369	0.0464446	0.000194048	0.000369925	0.999773
rs601945	Thyroid	ENSG00000241106.6	HLA-DOB	3.74968807055992	0.207136	0.0552409	0.000197587	0.000329341	0.326884
rs2727301	Thyroid	ENSG00000266173.6	STRADA	3.74527113723479	-0.0959207	0.0256111	0.000200999	0.000333816	0.0147366
rs3768321	Thyroid	ENSG00000183682.7	BMP8A	3.74382391171453	0.131527	0.0351318	0.000202129	0.000212081	0.86031
rs4688760	Whole_Blood	ENSG00000164077.13	MON1A	-3.72807072279232	-0.0841644	0.0225759	0.000211218	0.000769069	0.942589
rs1260326	Thyroid	ENSG00000234072.1	AC074117.10	-3.73088496901568	-0.0887005	0.0237746	0.000212503	0.000353616	0.926187
rs1260326	Adipose_Subcutaneous	ENSG00000138085.16	ATRAID	3.72713444847336	0.0848551	0.0227669	0.000215291	0.000304816	0.951855
rs2268078	Thyroid	ENSG00000100991.11	TRPC4AP	-3.71700406860707	-0.0821864	0.0221109	0.000224188	0.000649741
rs4688760	Colon_Transverse	ENSG00000243477.5	NAT6	3.72984890462616	0.154072	0.0413078	0.000229328	0.000420847	0.817996
rs9828772	Thyroid	ENSG00000249846.6	LINC02021	3.71001591413481	-0.235496	0.0634757	0.000230297	0.000333101	1
rs2268078	Colon_Sigmoid	ENSG00000101464.10	PIGU	3.73480246515451	0.14431	0.0386391	0.000230353	0.00024501
rs55653563	Whole_Blood	ENSG00000232063.1	RP11-307E17.8	-3.70293614218786	0.161454	0.0436017	0.00023277	0.000259128	0.0278336
rs4688760	Adipose_Visceral_Omentum	ENSG00000164068.15	RNF123	3.70923096308073	0.109133	0.0294219	0.000237345	0.00060952	0.932334
rs601945	Adipose_Subcutaneous	ENSG00000204301.6	NOTCH4	3.696378499526	0.123084	0.0332985	0.000242333	0.00026645	0.603621
rs6518681	Thyroid	ENSG00000100296.13	THOC5	-3.69414986413706	-0.280633	0.0759669	0.000244754	0.000393903
rs117483894	Muscle_Skeletal	ENSG00000274667.1	RP11-31H5.3	3.68861358824752	0.389949	0.105717	0.000244769	0.000271776	0.012411
rs11070332	Muscle_Skeletal	ENSG00000243789.10	JMJD7	3.68514325288224	0.105704	0.0286839	0.000248057	0.000337932	0.364977
rs28638142	Thyroid	ENSG00000135124.14	P2RX4	3.68949464144555	0.334035	0.0905368	0.000249155	0.000283046	0.854486
rs8046545	Thyroid	ENSG00000184730.10	APOBR	-3.68778654374334	0.107901	0.0292591	0.000250788	0.000251143	0.0121442
rs5758223	Adipose_Subcutaneous	ENSG00000167077.12	MEI1	3.68079068263579	0.168816	0.0458641	0.000257229	0.000409904
rs4688760	Pancreas	ENSG00000173540.12	GMPPB	3.69461787558999	0.124179	0.0336107	0.000270531	0.00041981	0.805725
rs8107974	Thyroid	ENSG00000089639.10	GMIP	3.66750444227044	0.20301	0.0553537	0.00027097	0.000272403	0.513214
rs11642430	Thyroid	ENSG00000102882.11	MAPK3	-3.66650914809589	-0.0940343	0.0256468	0.000271999	0.000461894	0.0800789
rs1783541	Thyroid	ENSG00000172543.7	CTSW	-3.65555962065214	-0.186166	0.0509268	0.00028356	0.000461751	0.0130371
rs11070332	Whole_Blood	ENSG00000137877.9	SPTBN5	3.65024215807526	0.116432	0.031897	0.000284844	0.000294873	0.42423
rs4688760	Colon_Transverse	ENSG00000164078.12	MST1R	3.65258828382367	0.0852715	0.0233455	0.000306609	0.000475244	0.804484
rs601945	Adipose_Subcutaneous	ENSG00000137411.16	VARS2	3.62440457260809	0.201221	0.0555183	0.000318618	0.00036927
rs7124681	Whole_Blood	ENSG00000165915.13	SLC39A13	3.60551425727282	0.0916564	0.0254212	0.000337441	0.00059363	0.151881
rs2102278	Muscle_Skeletal	ENSG00000188993.3	LRRC66	3.58914178827847	0.0864262	0.0240799	0.000357304	0.000596179	0.0143686
rs114447556	Muscle_Skeletal	ENSG00000226950.6	DANCR	3.58316381797449	0.180688	0.0504269	0.000365418	0.000390968	0.995643
rs2727301	Thyroid	ENSG00000007312.12	CD79B	3.58660016961238	-0.14454	0.0403	0.000367673	0.000377091	0.0435374
rs7124681	Colon_Transverse	ENSG00000165917.9	RAPSN	-3.58899780147398	-0.1699	0.0473391	0.000387977	0.000417059	0.158931
rs1783541	Adipose_Subcutaneous	ENSG00000172803.17	SNX32	3.56731101427542	0.22881	0.0641408	0.000394606	0.000417193	0.0925843
rs11070332	Thyroid	ENSG00000062524.15	LTK	3.56161124988586	0.191585	0.0537916	0.000403552	0.000421046	0.51762
rs75423501	Adipose_Subcutaneous	ENSG00000160801.13	PTH1R	-3.54353042135081	-0.189458	0.053466	0.000431014	0.000480212	0.621303
rs75423501	Thyroid	ENSG00000114650.18	SCAP	-3.52197056655032	-0.157416	0.0446953	0.000467266	0.000607662	0.709825
rs4688760	Thyroid	ENSG00000114378.16	HYAL1	-3.51988494131539	-0.121768	0.0345943	0.000470866	0.000973216	0.812654
rs4688760	Muscle_Skeletal	ENSG00000185614.4	FAM212A	3.49664096202534	0.103634	0.0296381	0.000503959	0.00108152	0.840046
rs7124681	Adipose_Subcutaneous	ENSG00000165917.9	RAPSN	-3.48153586075164	-0.138141	0.0396782	0.000541257	0.000687243	0.100627
rs75423501	Thyroid	ENSG00000164048.13	ZNF589	-3.39855084822502	-0.220087	0.0647591	0.000731094	0.000857472
rs7124681	Thyroid	ENSG00000165915.13	SLC39A13	3.38182345136066	0.0690278	0.0204114	0.000776029	0.000883272	0.194421
